# Supplementary material for: Construction of dispirocyclohexanes via amine-catalyzed [2 + 2 + 2] annulations of Morita–Baylis–Hillman acetates with exocyclic alkenes
Source: Royal Society of Chemistry journal article supplement (doi:10.1039/c4ob01927j), 2014-10-14

*Electronic Supplementary Information*

**Construction of Dispirocyclohexanes via Amine-Catalyzed [2 + 2 + 2]**

**Annulations of Morita-Baylis-Hillman Acetates with Exocyclic Alkenes**

Rongshun Chen,<sup>a</sup> Silong Xu,<sup>b\*</sup> Xia Fan,<sup>a</sup> Hanyuan Li,<sup>a</sup> Yuhai Tang,<sup>b</sup> and Zhengjie He<sup>a\*</sup>

<sup>a</sup> The State Key Laboratory of Elemento-Organic Chemistry, Nankai University, Collaborative Innovation Center of Chemical Science and Engineering (Tianjin), 94 Weijin Road, Tianjin 300071, P. R. China.

Fax: +86 22 23501520; e-mail: [zhengjiehe@nankai.edu.cn](mailto:zhengjiehe@nankai.edu.cn)

<sup>b</sup> Department of Chemistry, School of Science, Xi'an Jiaotong University, Xi'an 710049, P. R. China.

Fax: +86 29 82655399; e-mail: [silongxu@mail.xjtu.edu.cn](mailto:silongxu@mail.xjtu.edu.cn)

**Table of Contents**

|                                                          |     |
|----------------------------------------------------------|-----|
| I. ORTEP Representation of <b>3r</b> and <b>5f</b> ..... | S2  |
| II. NMR Spectra for <b>3</b> and <b>5</b> .....          | S4  |
| III. NOESY Spectra for Compound <b>5a</b> .....          | S93 |

## I. ORTEP Representation of 3r and 5f

**Table S1.** Crystal data and structure refinement for **3r**

|                                   |                                                                                                  |
|-----------------------------------|--------------------------------------------------------------------------------------------------|
| Identification code               | <b>3r</b>                                                                                        |
| Empirical formula                 | C <sub>43</sub> H <sub>32</sub> F <sub>6</sub> O <sub>6</sub>                                    |
| Formula weight                    | 758.69                                                                                           |
| Temperature                       | 173(2) K                                                                                         |
| Wavelength                        | 0.71073 Å,                                                                                       |
| Crystal system, space group       | Monoclinic, P2(1)/c                                                                              |
| Unit cell dimensions              | a = 12.174(2) Å    α = 90 °<br>b = 21.206(4) Å    β = 92.65(3) °<br>c = 14.570(3) Å,    γ = 90 ° |
| Volume                            | 3757.4(13) Å <sup>3</sup>                                                                        |
| Z, Calculated density             | 4, 1.379 Mg/m <sup>3</sup>                                                                       |
| Absorption coefficient            | 0.145 mm <sup>-1</sup>                                                                           |
| F(000)                            | 16100                                                                                            |
| Crystal size                      | 0.20 x 0.18 x 0.12 mm <sup>3</sup>                                                               |
| Theta range for data collection   | 1.70 to 27.94 °                                                                                  |
| Limiting indices                  | -16 ≤ h ≤ 14, -27 ≤ k ≤ 27, -19 ≤ l ≤ 19                                                         |
| Reflections collected / unique    | 37451 / 8963 [R(int) = 0.0769]                                                                   |
| Completeness to the θ = 25.02°    | 99.5 %                                                                                           |
| Absorption correction             | Semi-empirical from equivalents                                                                  |
| Max. and min. transmission        | 0.9828 and 0.9716                                                                                |
| Refinement method                 | Full-matrix least-squares on F <sup>2</sup>                                                      |
| Data / restraints / parameters    | 8963 / 78 / 551                                                                                  |
| Goodness-of-fit on F <sup>2</sup> | 0.981                                                                                            |
| Final R indices[I > 2σ(I)]        | R1 = 0.0613, wR2 = 0.1365                                                                        |
| R indices (all data)              | R1 = 0.1068, wR2 = 0.1590                                                                        |
| Largest diff. peak and hole       | 0.296 and -0.324 e. Å <sup>-3</sup>                                                              |

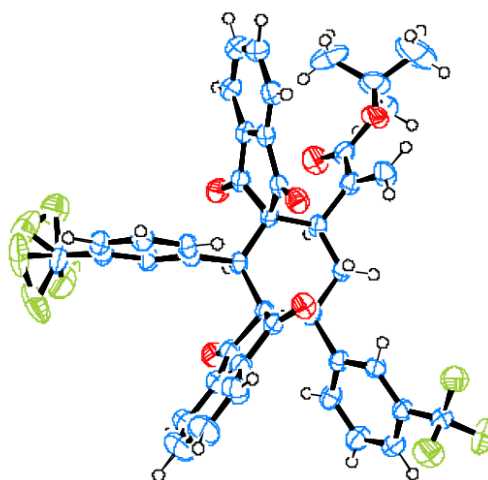

**Figure S1.** ORTEP Drawing for **3r**

**Table S2.** Crystal data and structure refinement for **5f**

|                                   |                                                                                                              |
|-----------------------------------|--------------------------------------------------------------------------------------------------------------|
| Identification code               | <b>5f</b>                                                                                                    |
| Empirical formula                 | C <sub>37</sub> H <sub>41</sub> N <sub>2</sub> O <sub>10</sub>                                               |
| Formula weight                    | 673.72                                                                                                       |
| Temperature                       | 293(2) K                                                                                                     |
| Wavelength                        | 0.71073 Å,                                                                                                   |
| Crystal system, space group       | Triclinic, P-1                                                                                               |
| Unit cell dimensions              | a = 10.530(2) Å    α = 65.69(3) °<br>b = 13.602(3) Å    β = 80.28(3) °<br>c = 13.650(3) Å,    γ = 81.84(3) ° |
| Volume                            | 1750.5(6) Å <sup>3</sup>                                                                                     |
| Z, Calculated density             | 2, 1.278 Mg/m <sup>3</sup>                                                                                   |
| Absorption coefficient            | 0.093 mm <sup>-1</sup>                                                                                       |
| F(000)                            | 714                                                                                                          |
| Crystal size                      | 0.20 x 0.18 x 0.12 mm <sup>3</sup>                                                                           |
| Theta range for data collection   | 1.81 to 29.07 °                                                                                              |
| Limiting indices                  | -14 ≤ h ≤ 14, -18 ≤ k ≤ 14, -18 ≤ l ≤ 17                                                                     |
| Reflections collected / unique    | 18820 / 8967 [R(int) = 0.0425]                                                                               |
| Completeness to the θ = 25.02°    | 95.6 %                                                                                                       |
| Absorption correction             | Semi-empirical from equivalents                                                                              |
| Max. and min. transmission        | 0.9889 and 0.9816                                                                                            |
| Refinement method                 | Full-matrix least-squares on F <sup>2</sup>                                                                  |
| Data / restraints / parameters    | 8967 / 84 / 472                                                                                              |
| Goodness-of-fit on F <sup>2</sup> | 0.998                                                                                                        |
| Final R indices[I > 2σ(I)]        | R1 = 0.0535, wR2 = 0.1128                                                                                    |
| R indices (all data)              | R1 = 0.1238, wR2 = 0.1361                                                                                    |
| Largest diff. peak and hole       | 0.366 and -0.361 e. Å <sup>-3</sup>                                                                          |

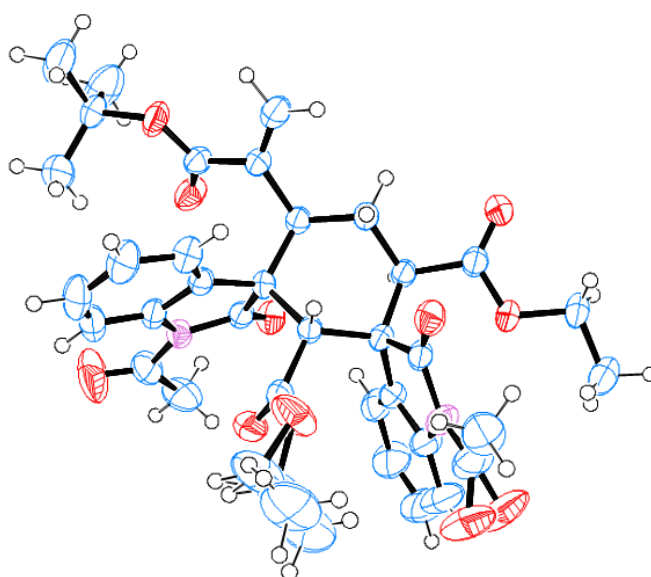**Figure S2.** ORTEP Drawing for **5f**

## II. NMR Spectra for 3 and 5

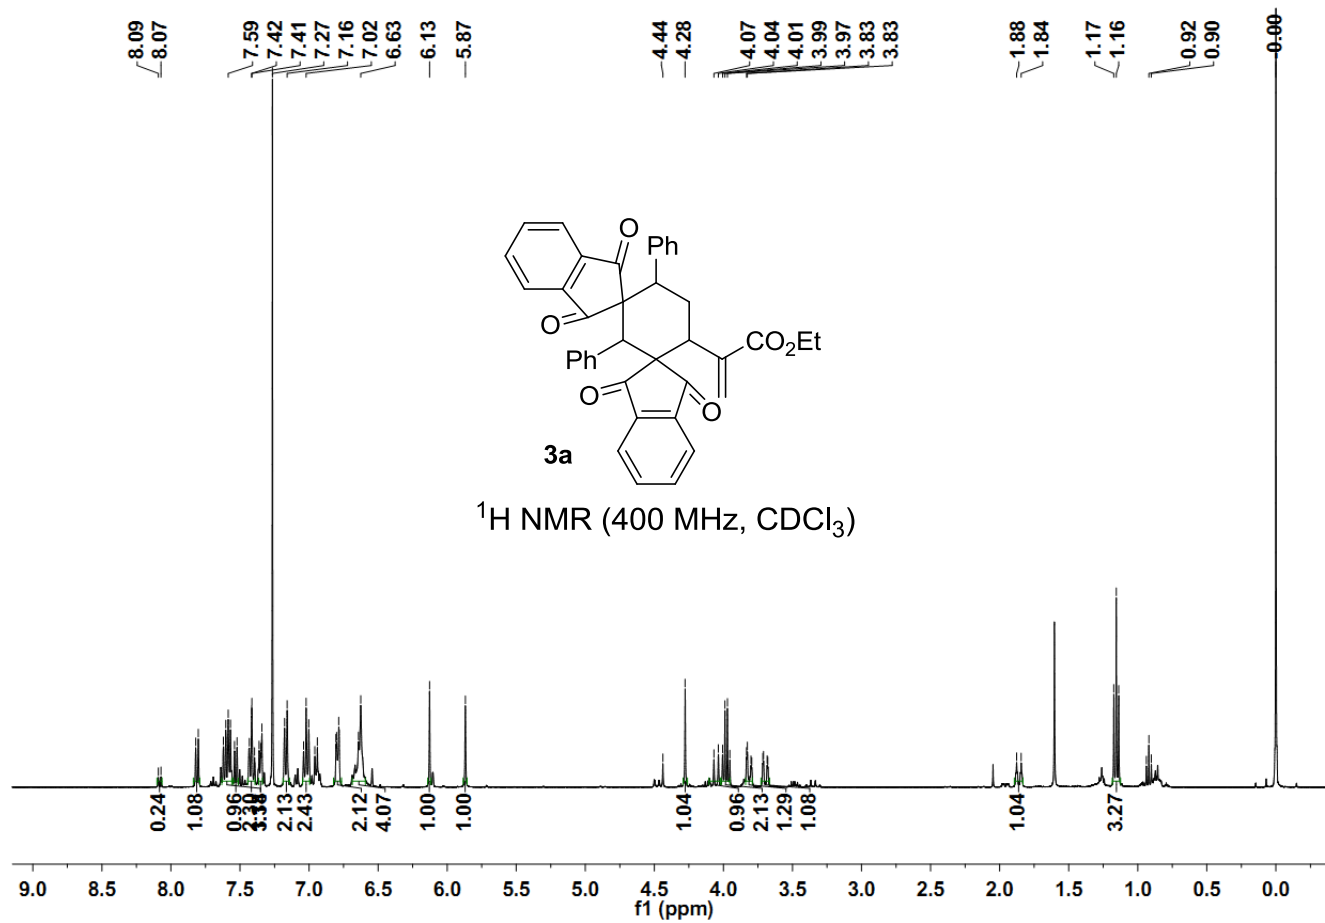

202.83  
200.90  
200.23  
200.04

166.39

135.54  
135.09  
134.72  
134.33

122.61  
122.38  
122.22  
122.02

77.32  
77.00  
76.68

63.09  
60.92

54.42  
48.83  
42.70

29.64

13.82

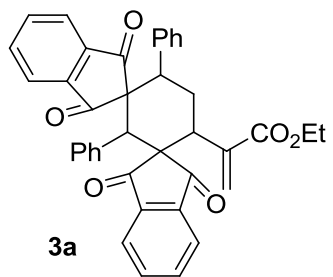

$^{13}\text{C}$  NMR (100 MHz,  $\text{CDCl}_3$ )

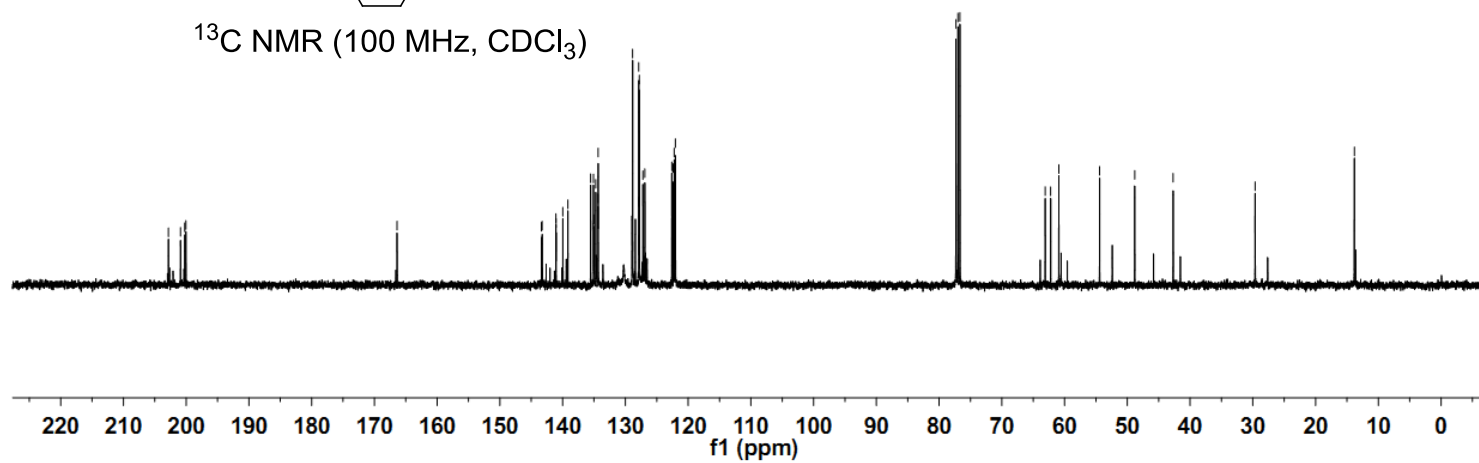

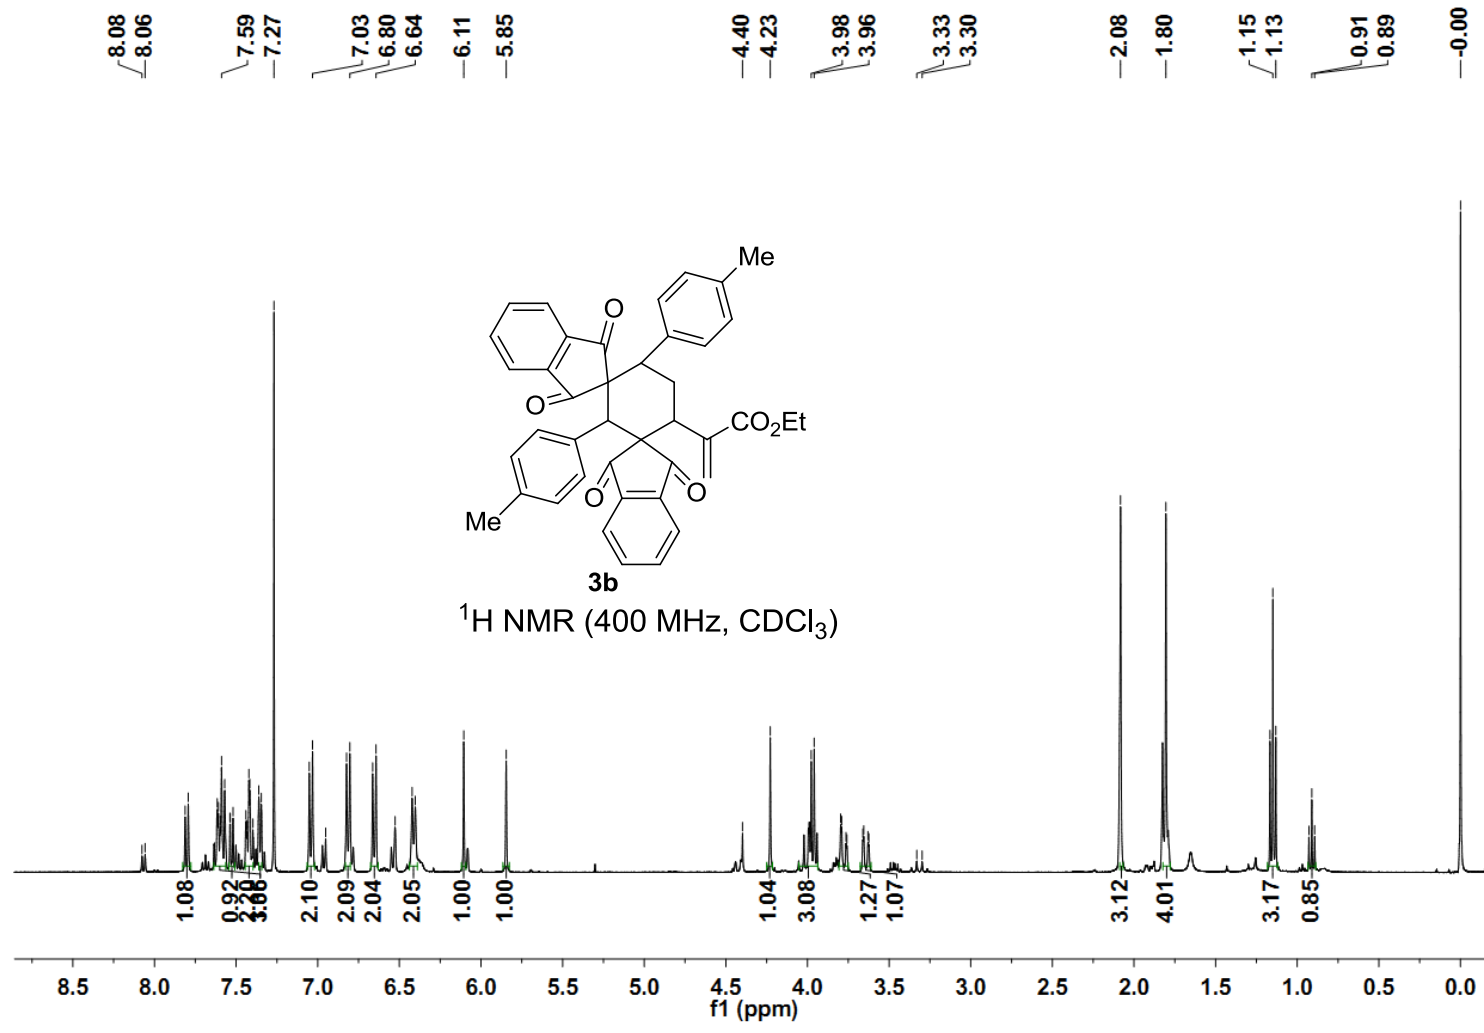

203.08  
201.05  
200.42  
200.14

166.41

135.48  
134.97  
134.63  
128.69  
128.54  
128.42

122.59  
122.37  
122.21  
122.01

77.32  
77.00  
76.68

63.20  
60.90  
54.00  
48.39  
42.78

29.84  
20.51  
13.82

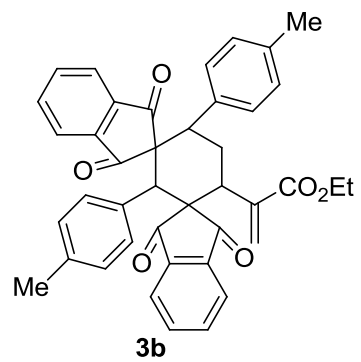

<sup>13</sup>C NMR (100 MHz, CDCl<sub>3</sub>)

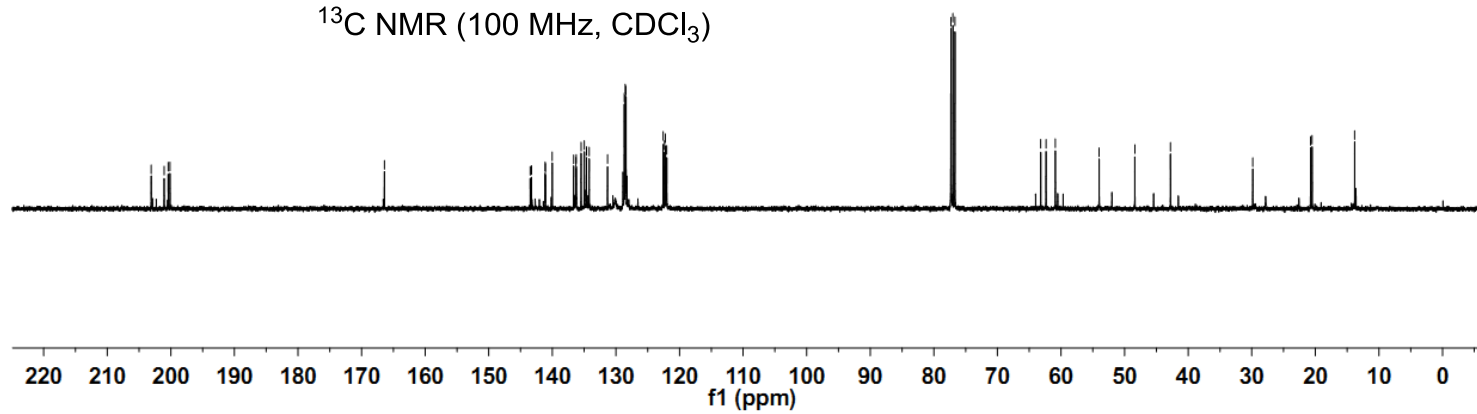

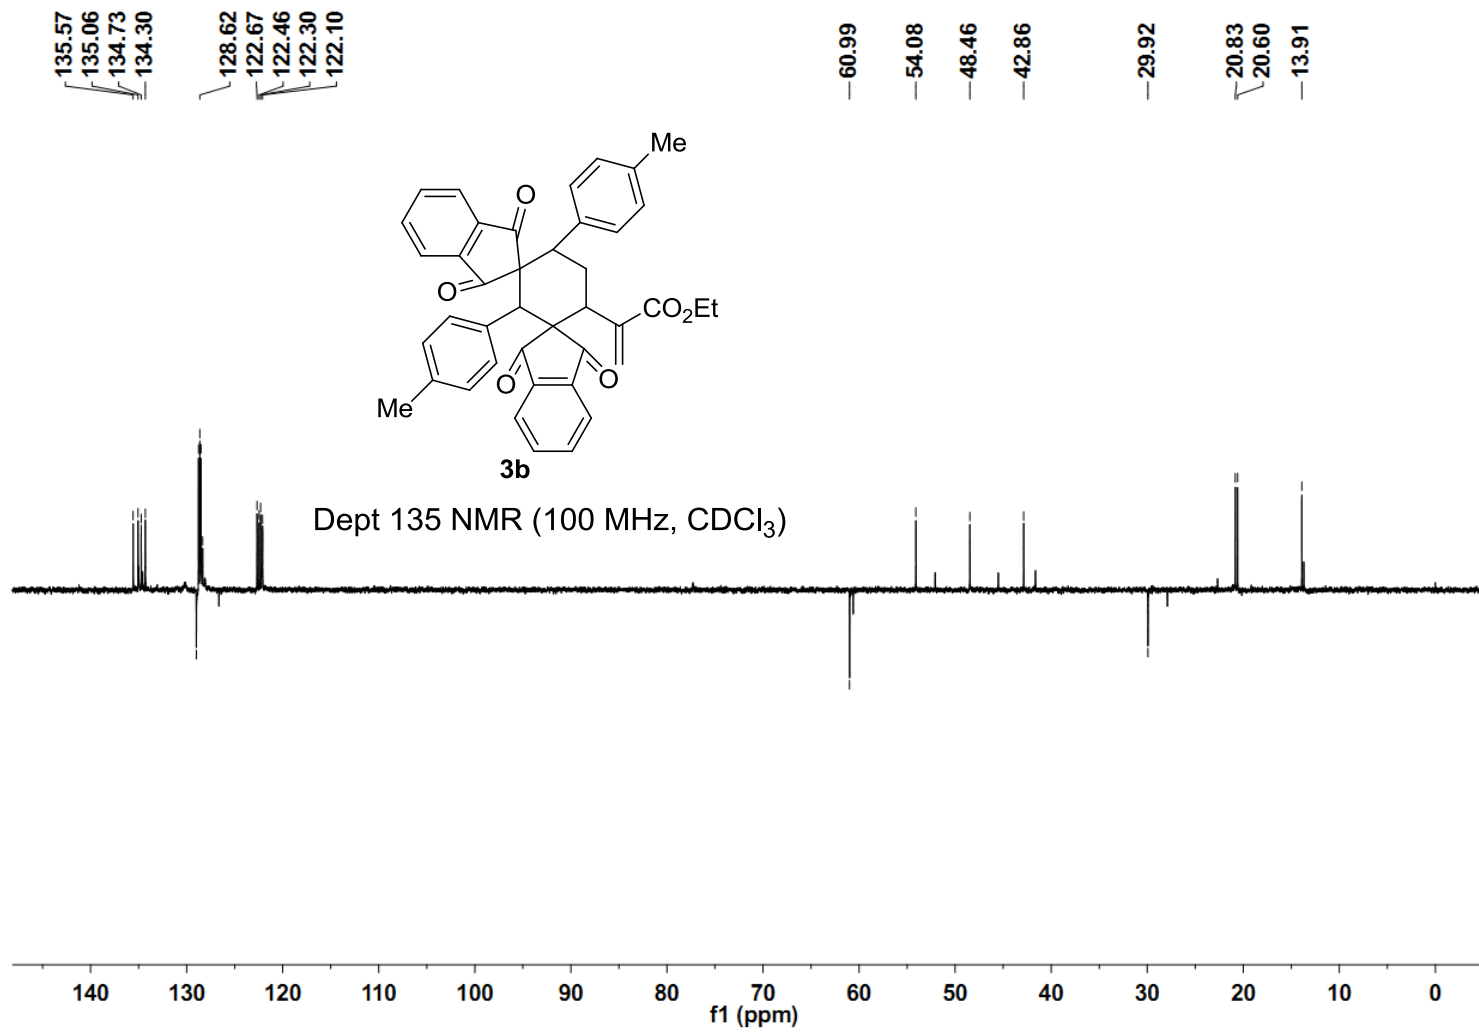



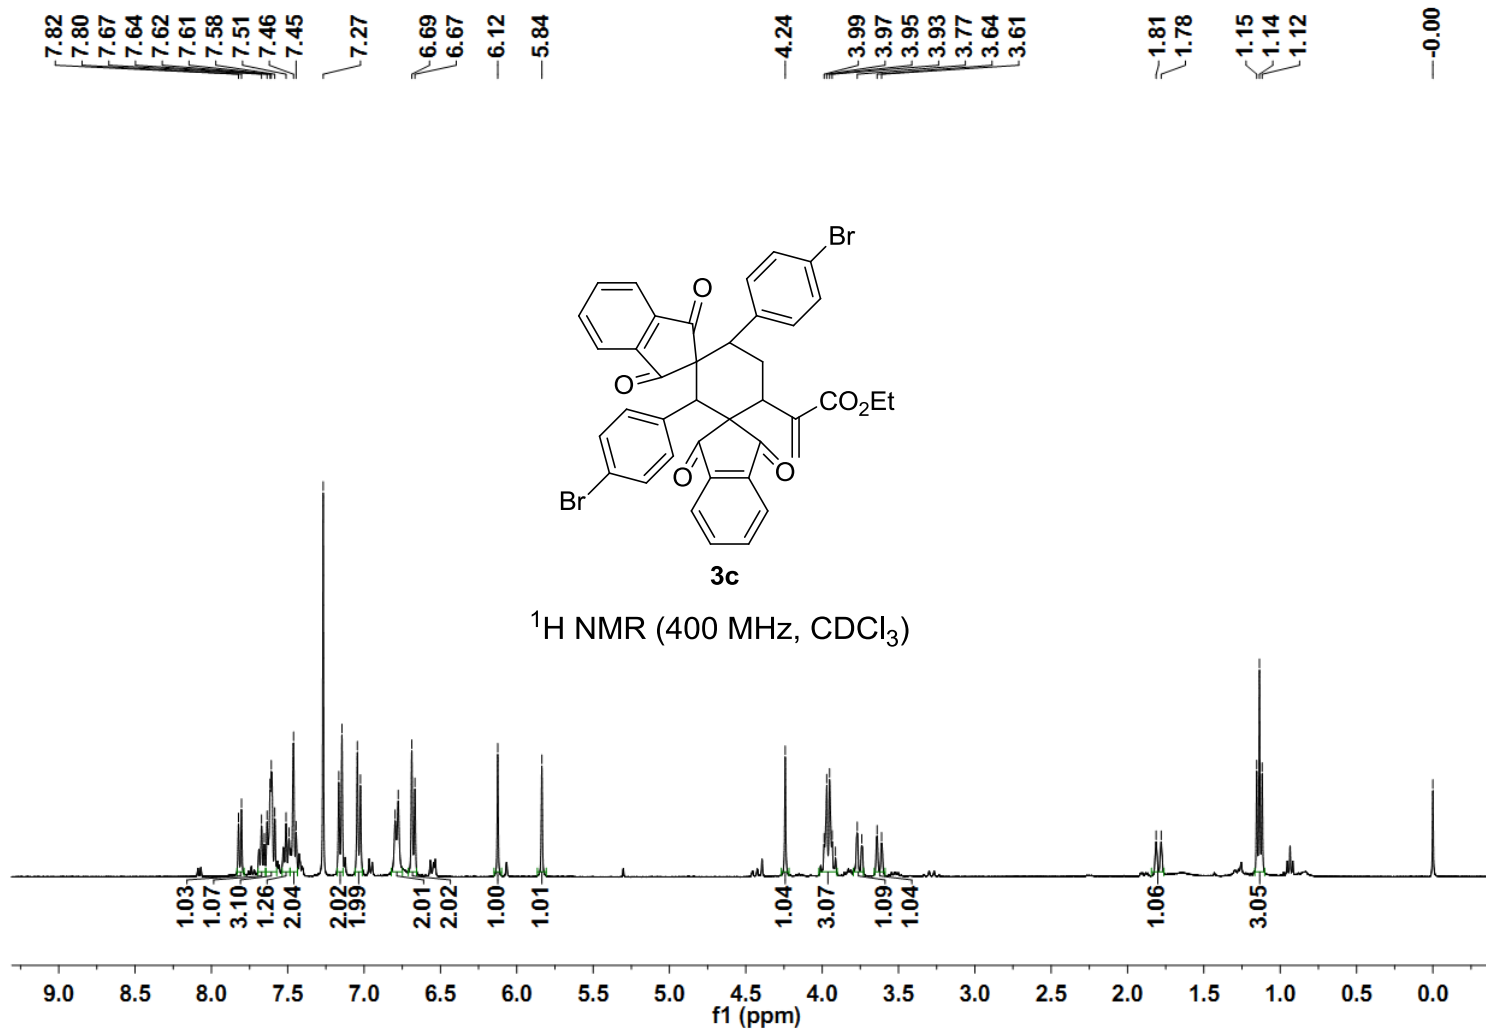

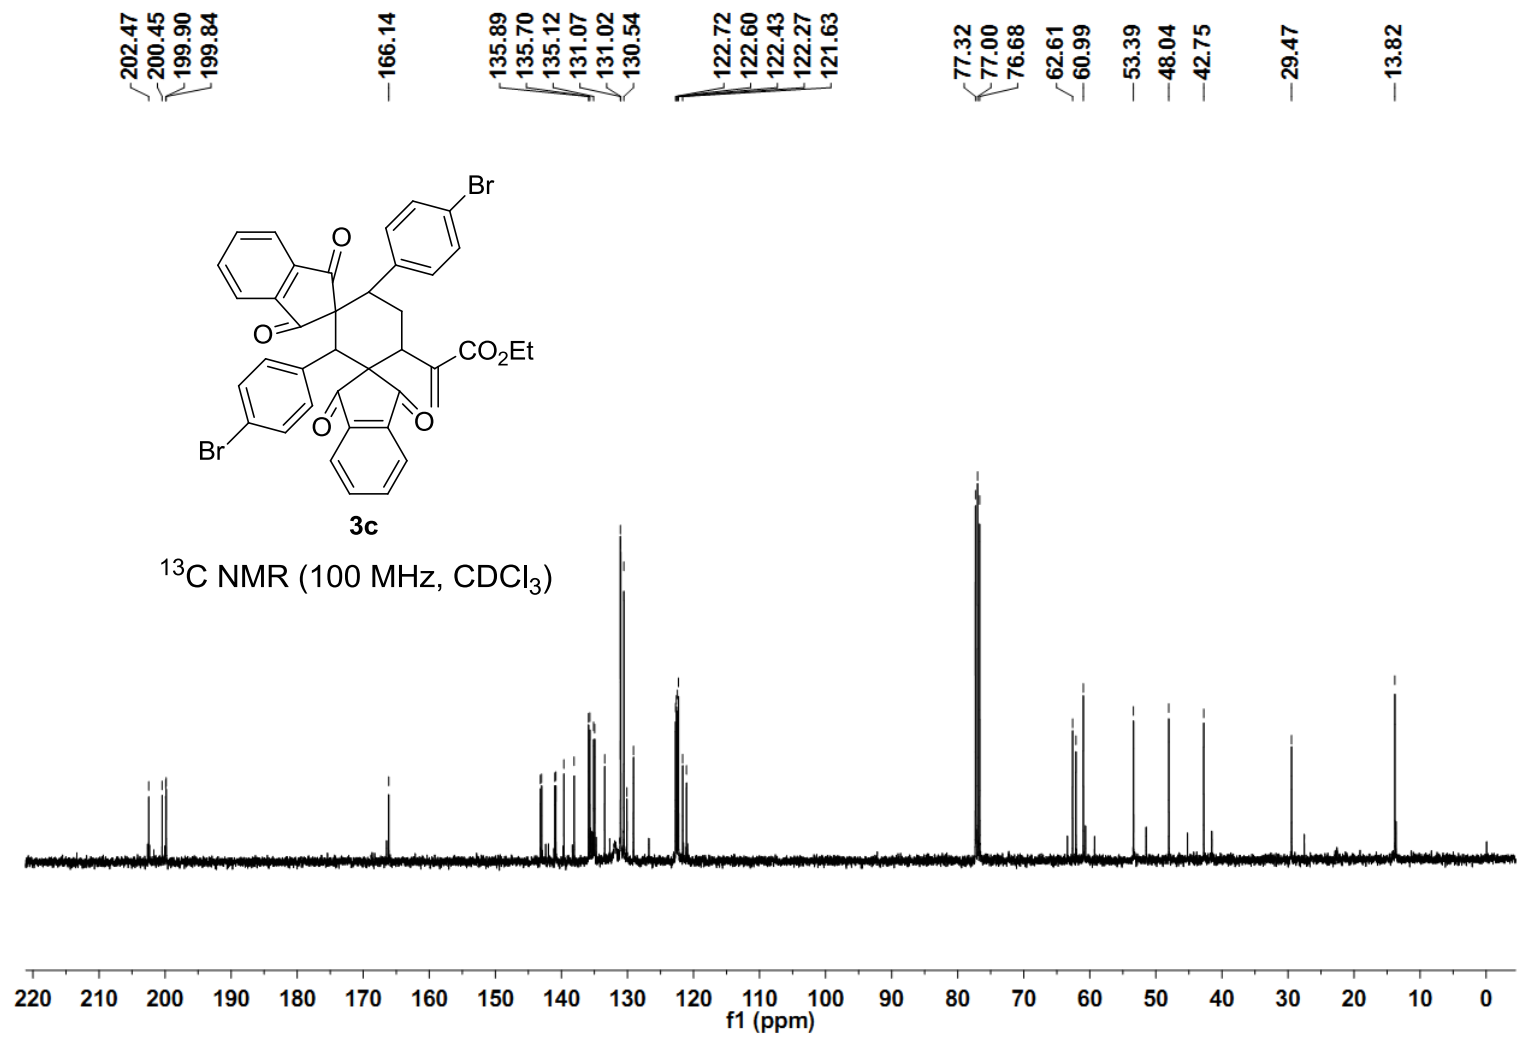

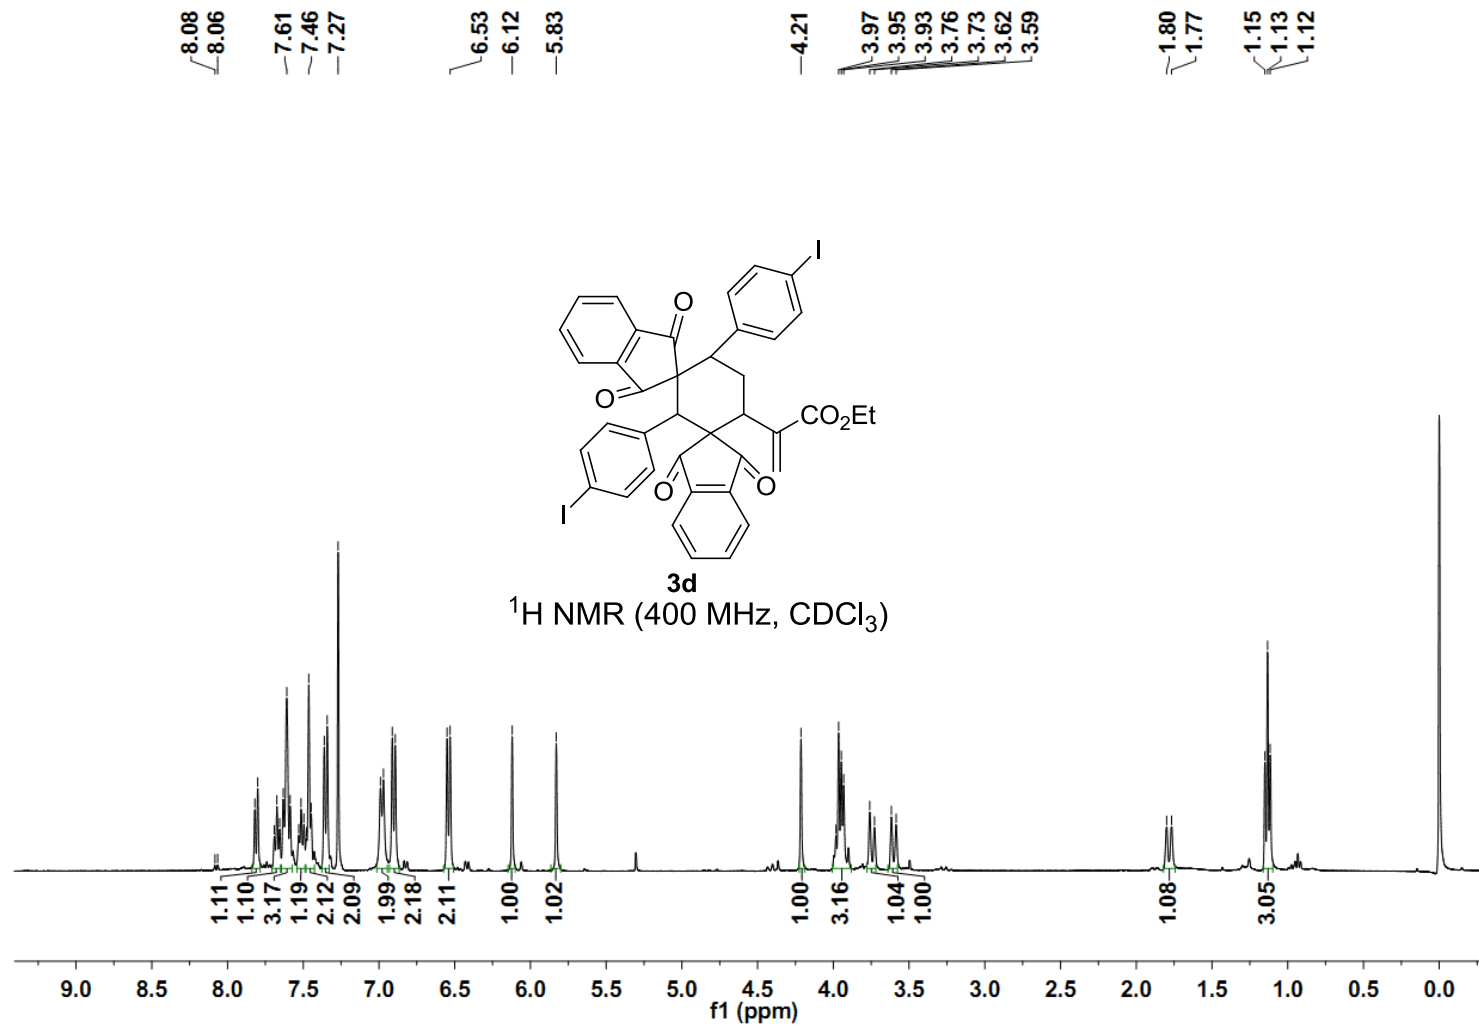

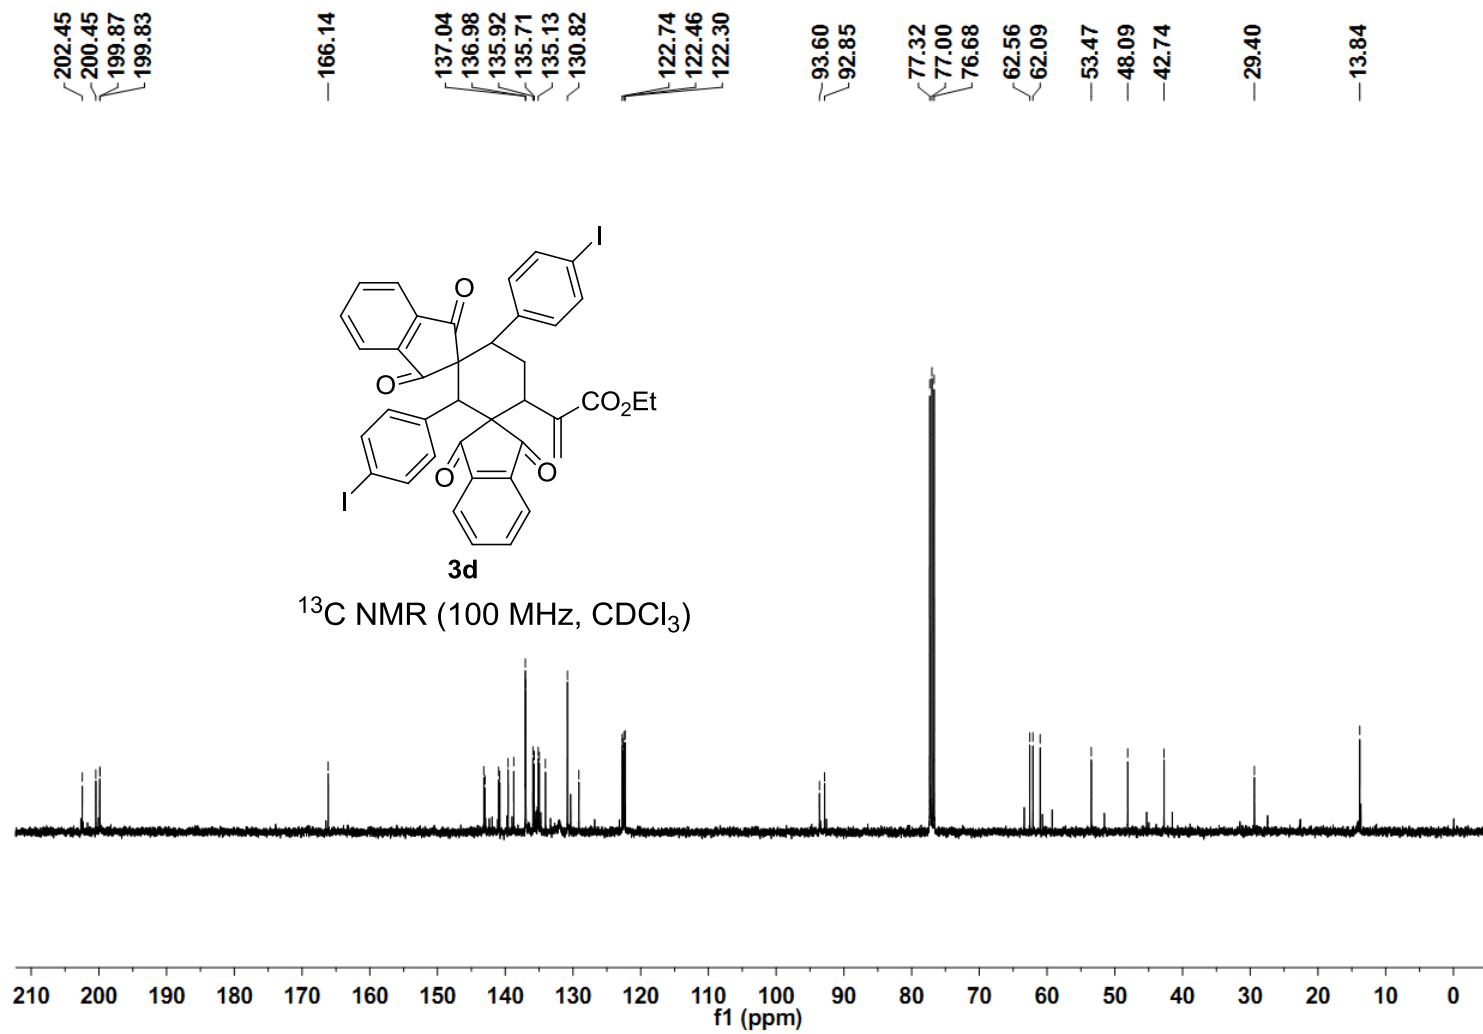

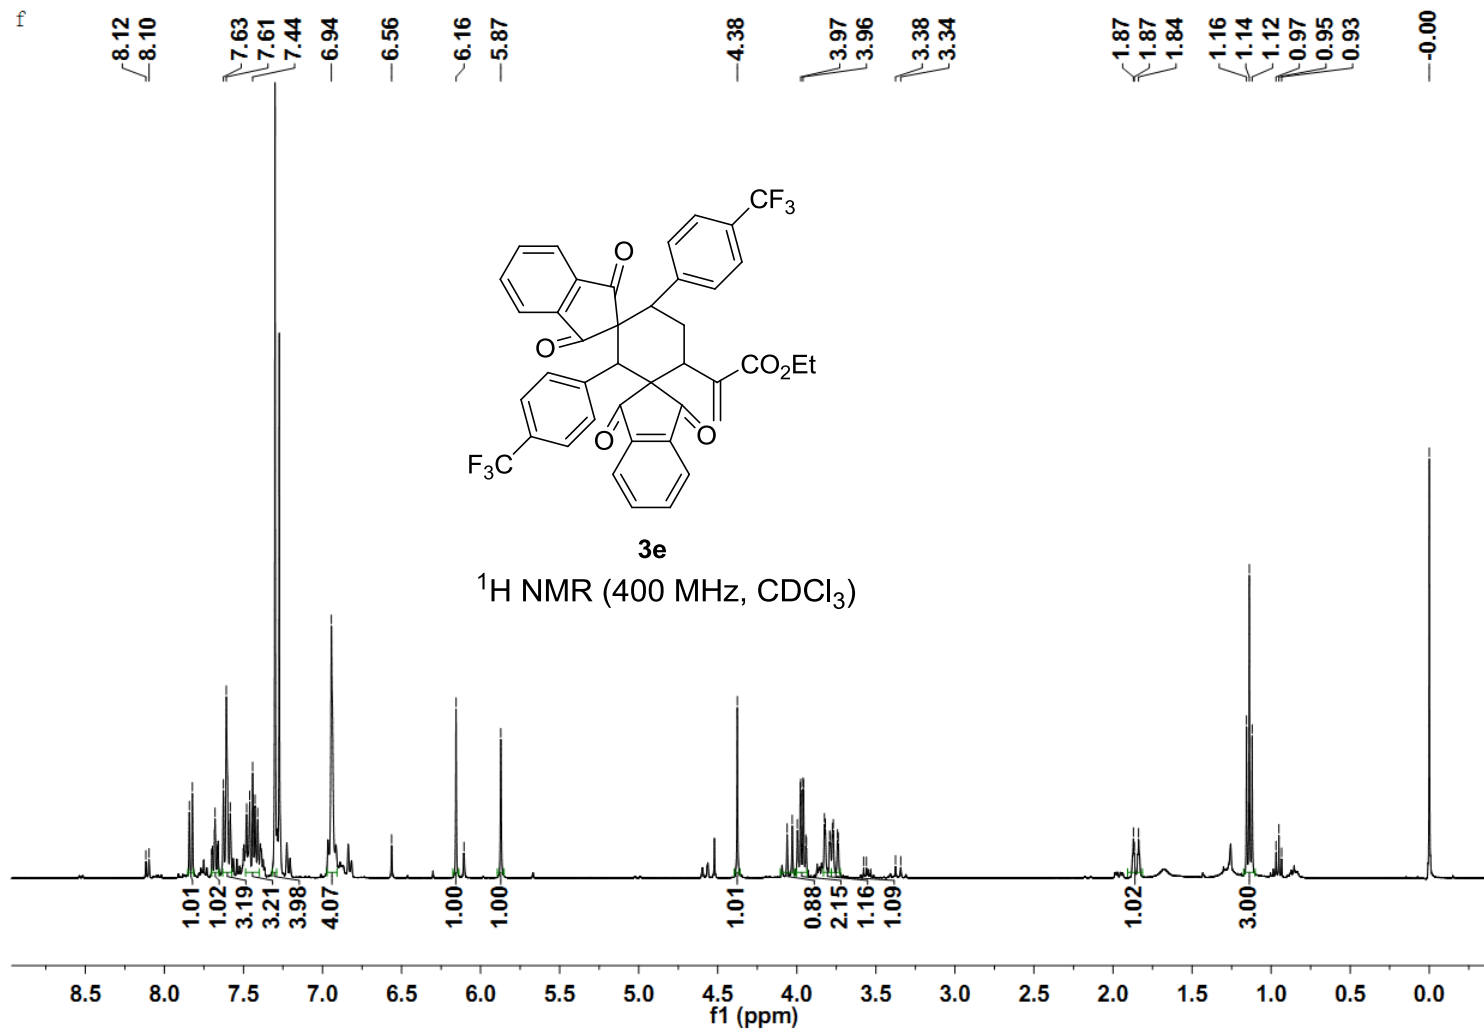

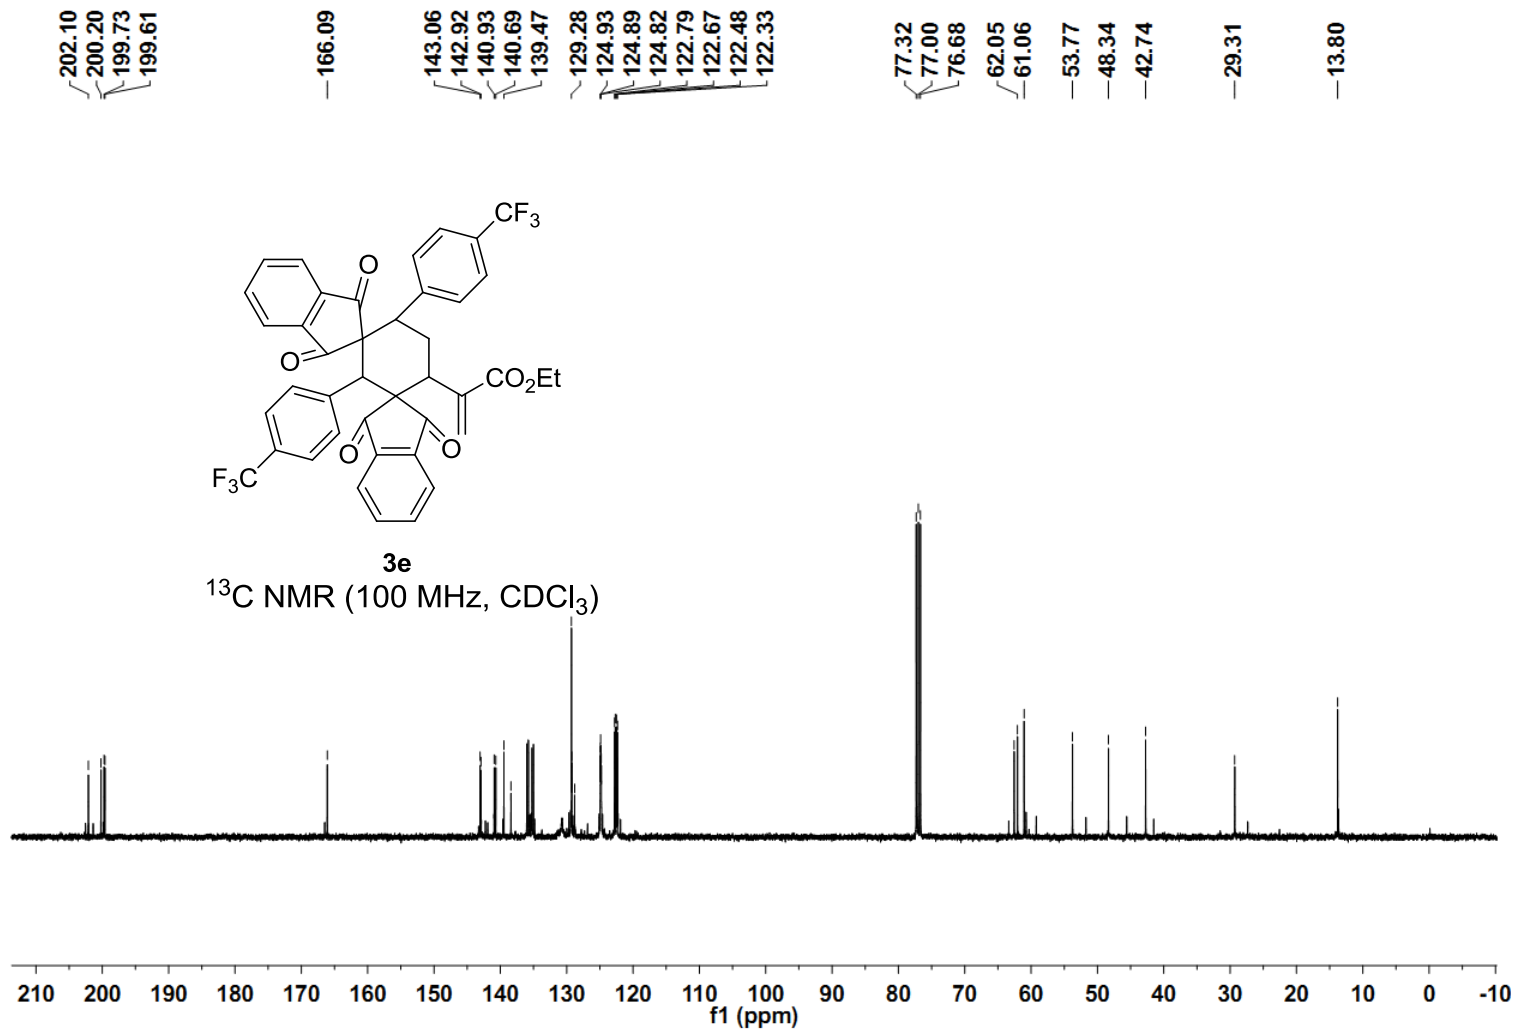

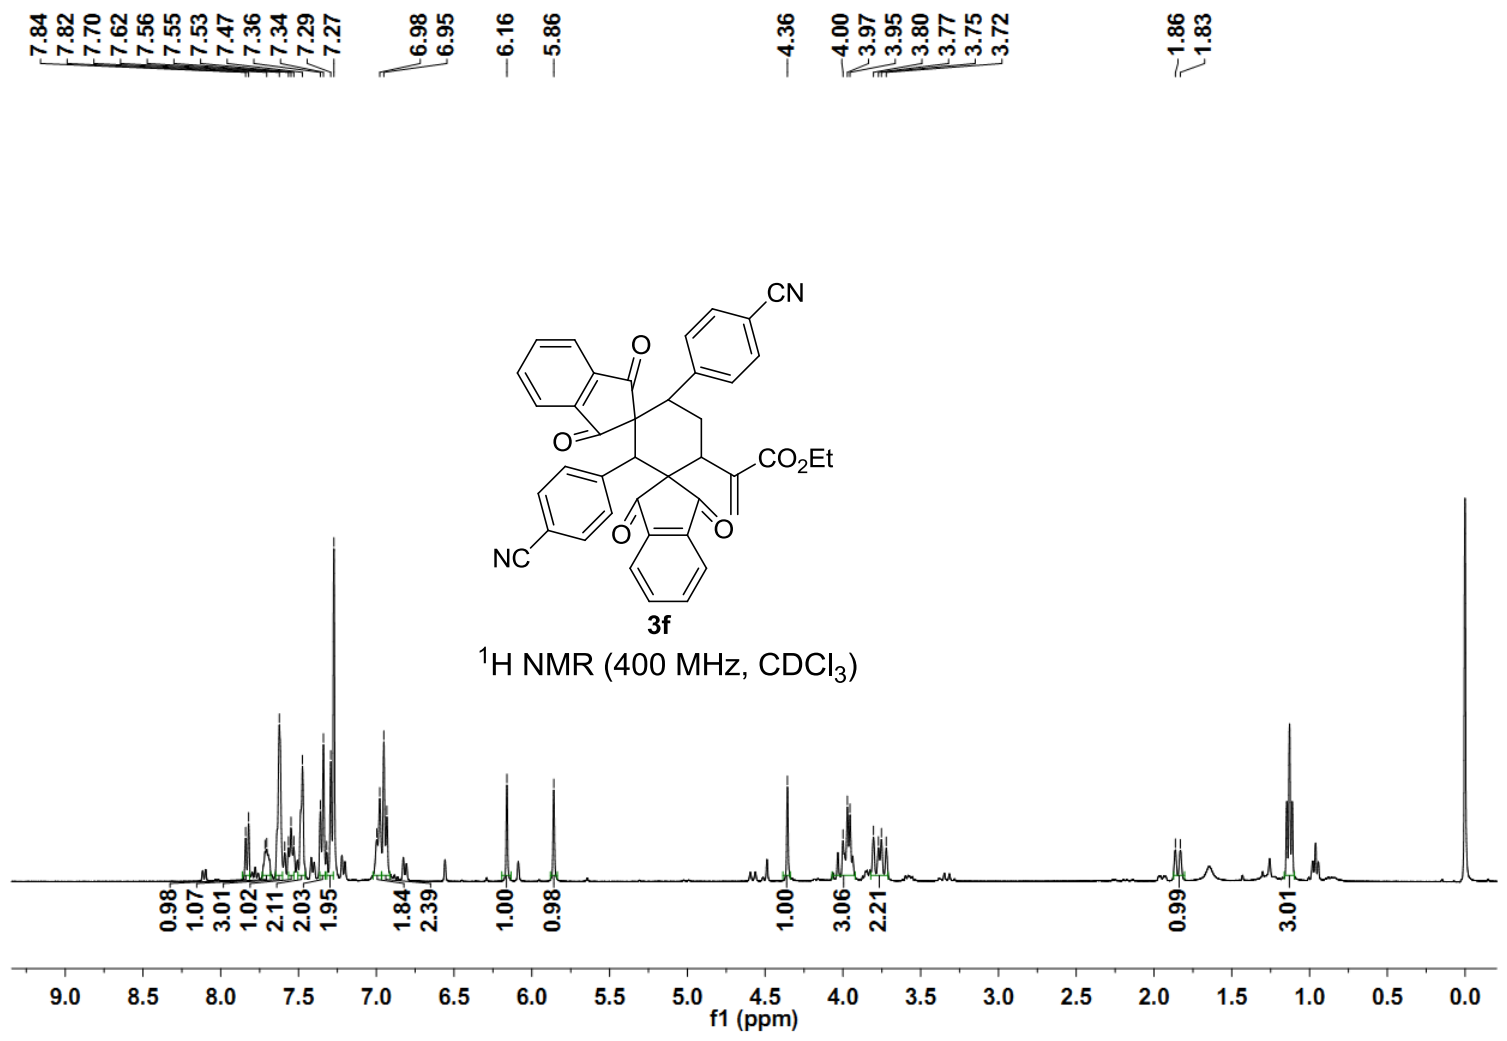

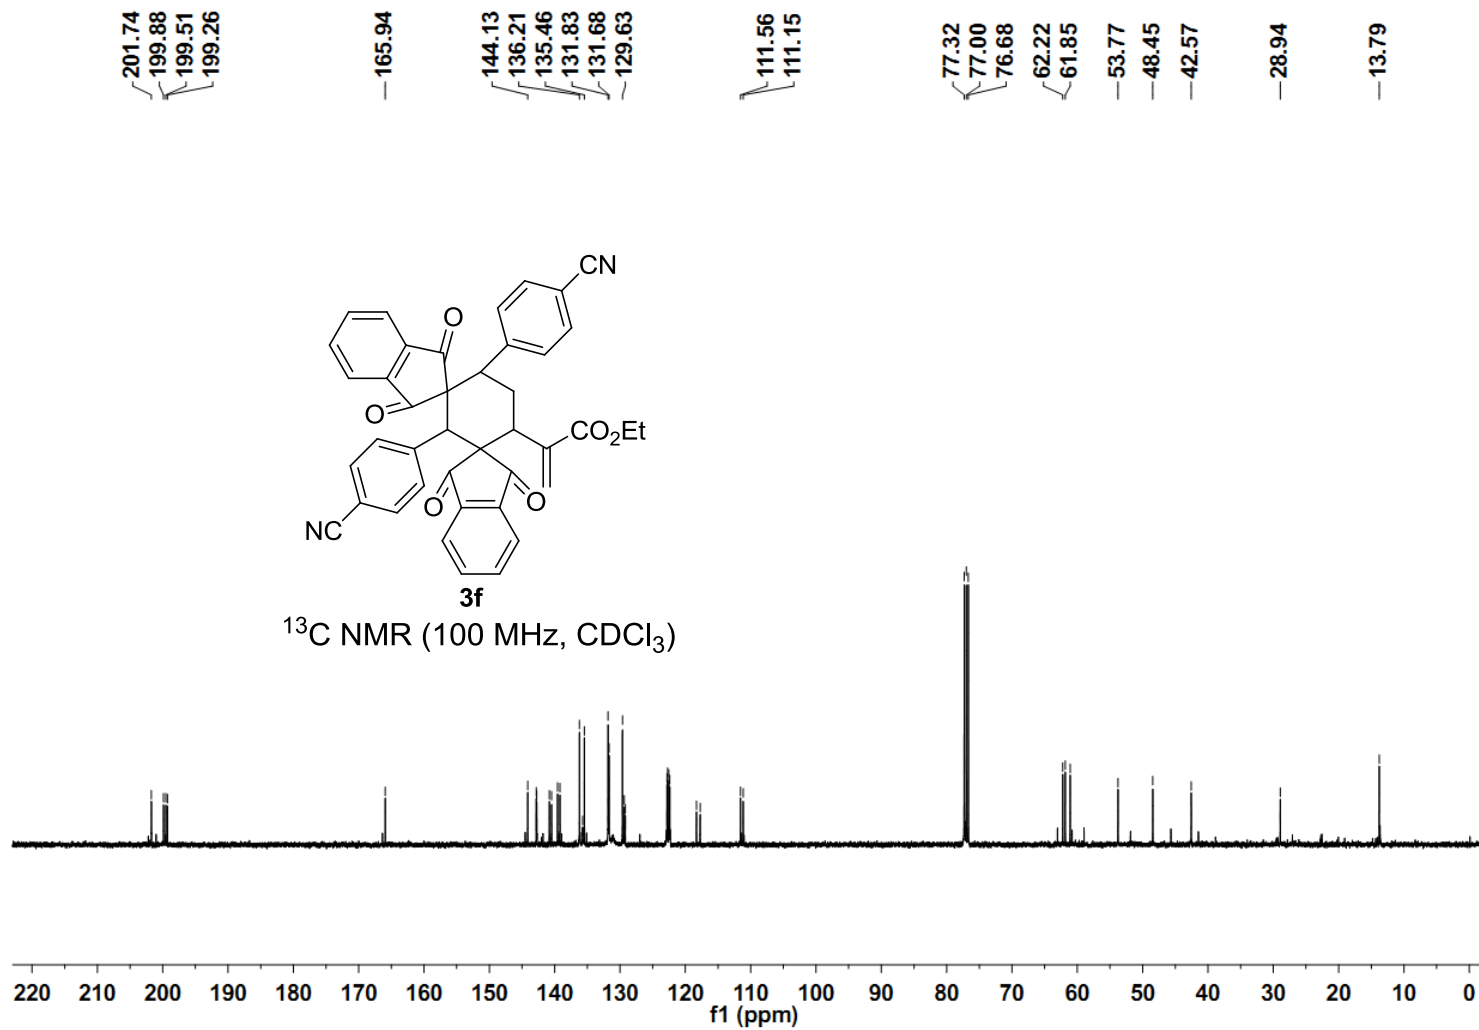



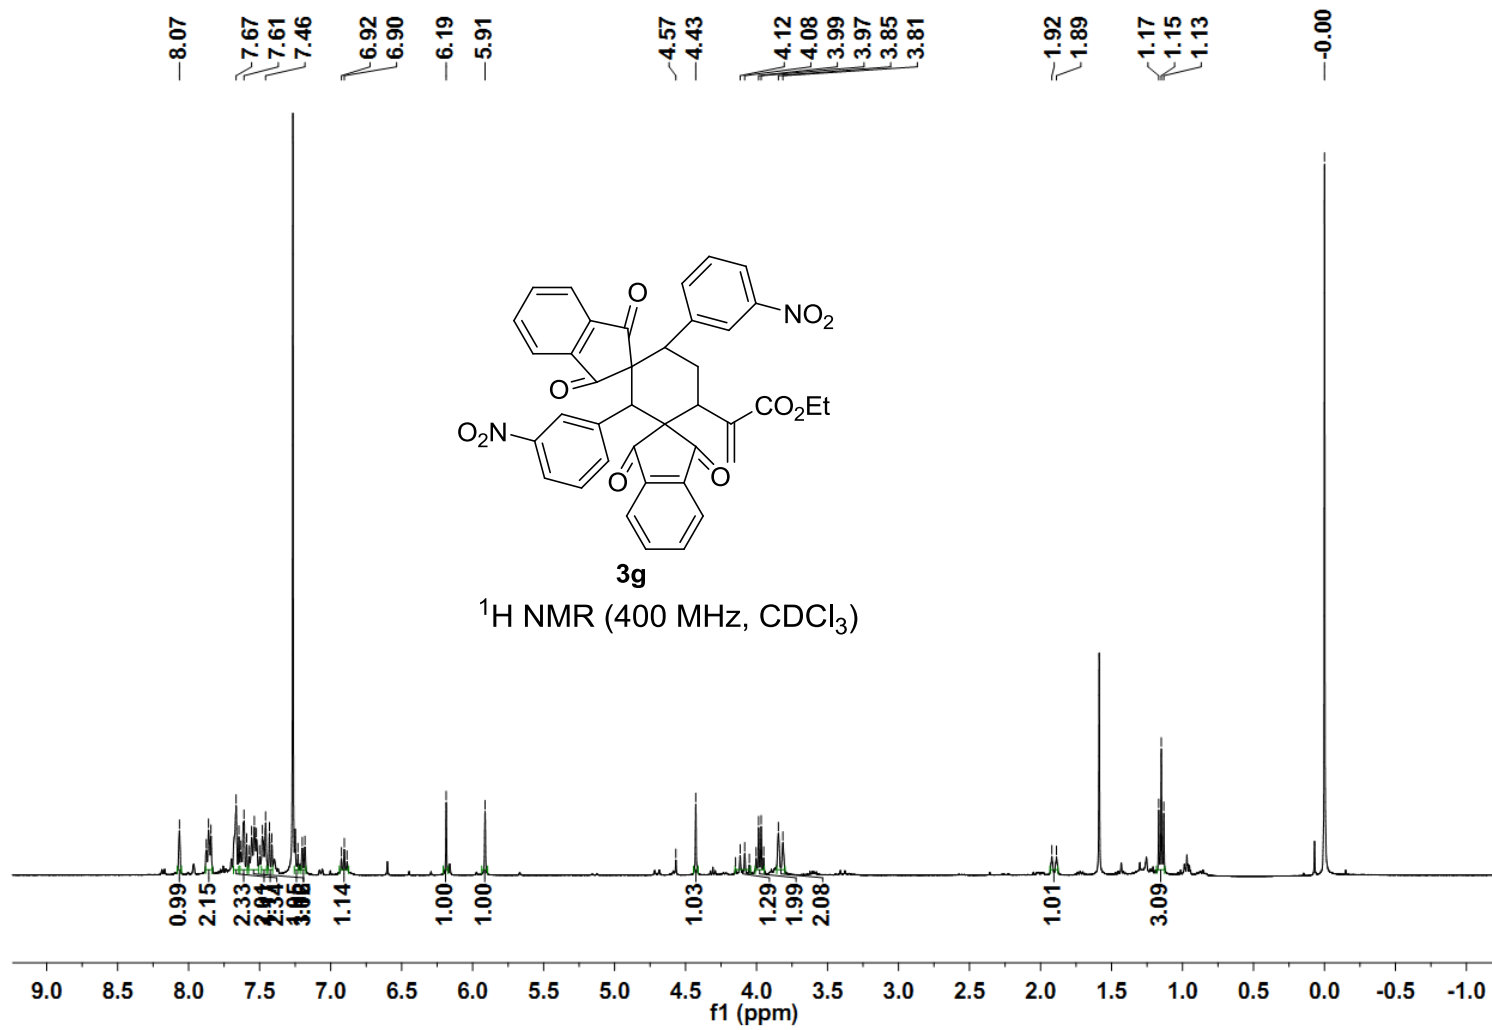

201.61  
199.82  
199.37  
199.02

165.97

136.23  
136.12  
135.43  
135.34  
135.17

122.95  
122.76  
122.69  
122.63  
122.48

77.32  
77.00  
76.68

62.30

53.52  
47.84  
42.64

29.21

13.84

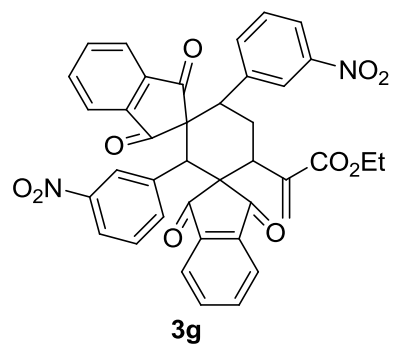

<sup>13</sup>C NMR (100 MHz, CDCl<sub>3</sub>)

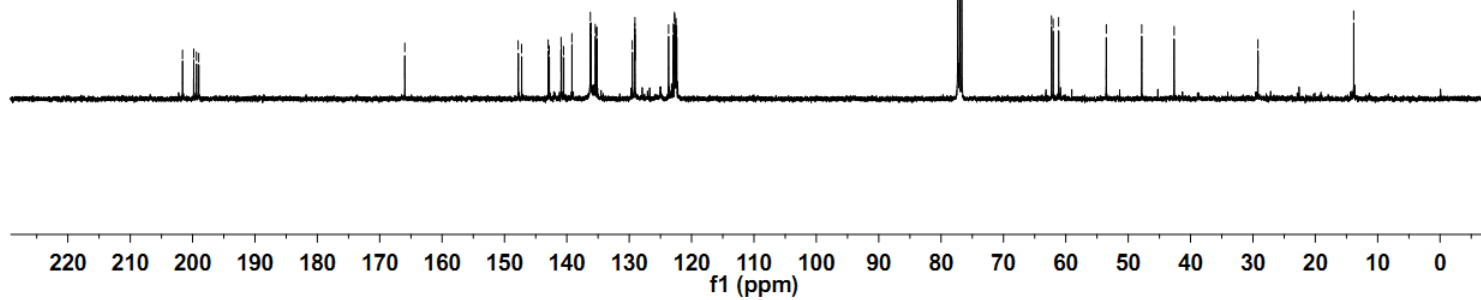

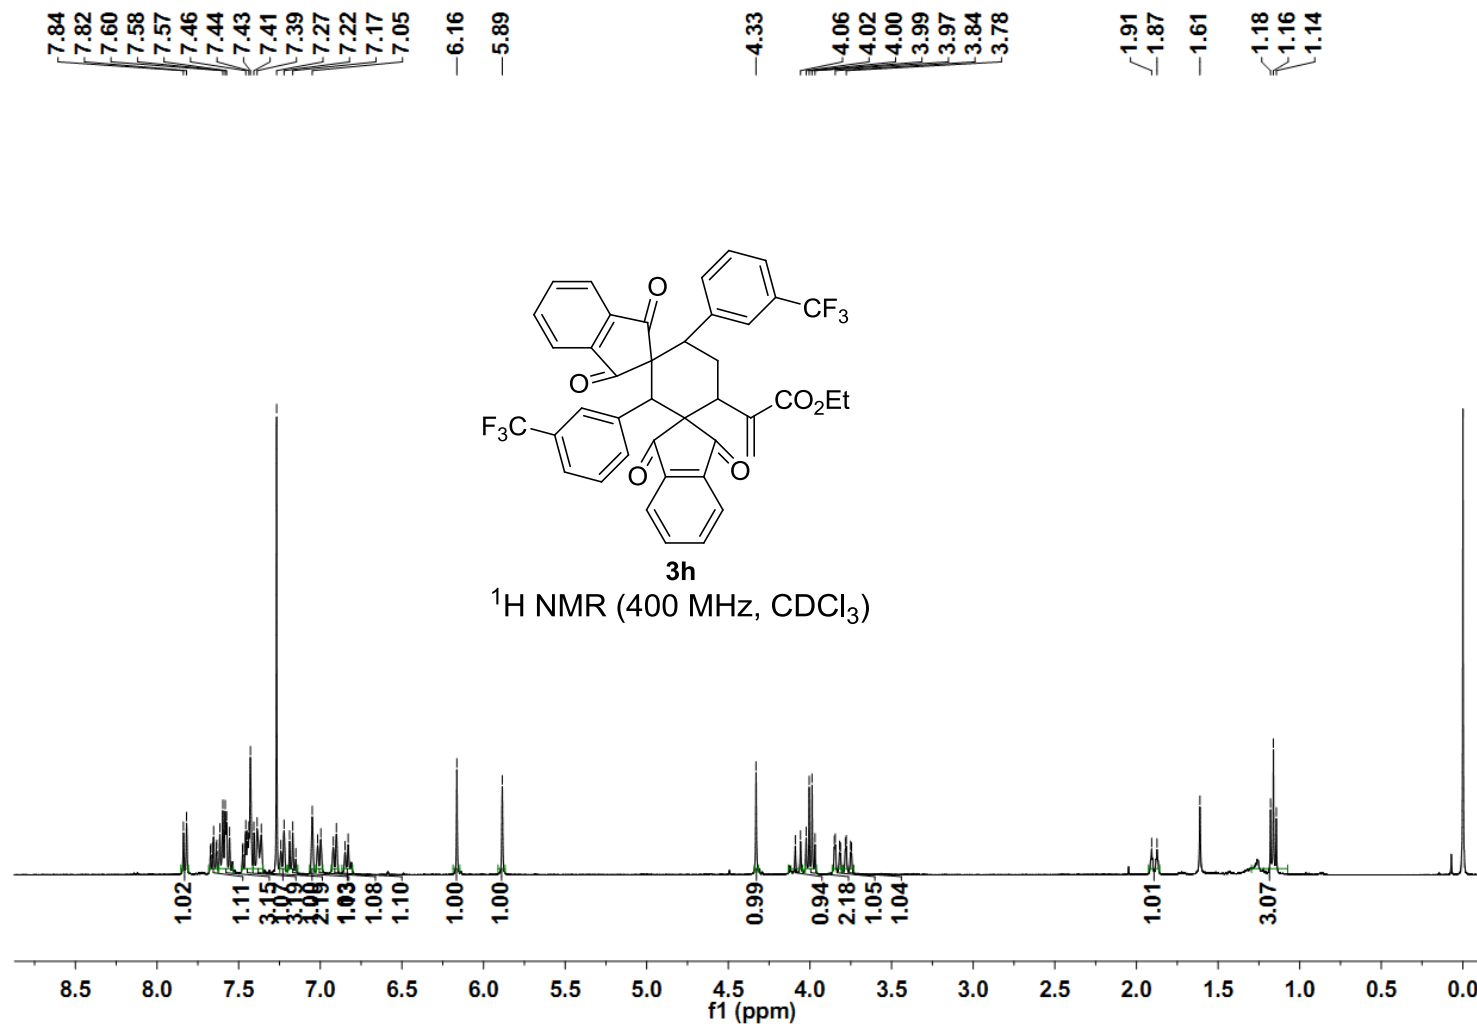

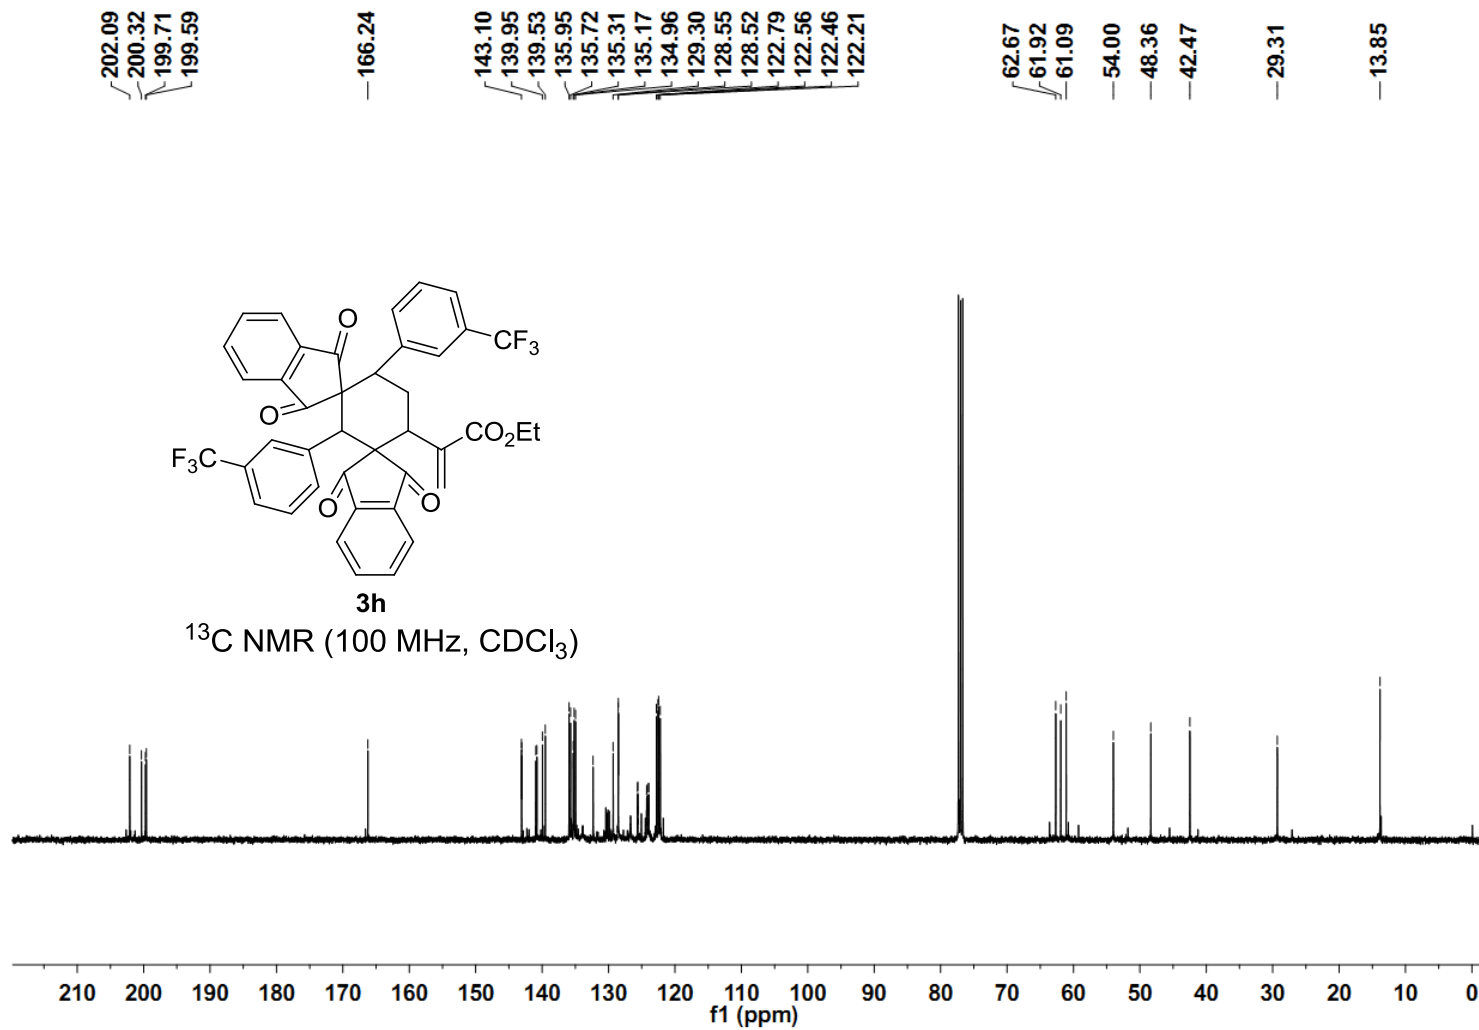

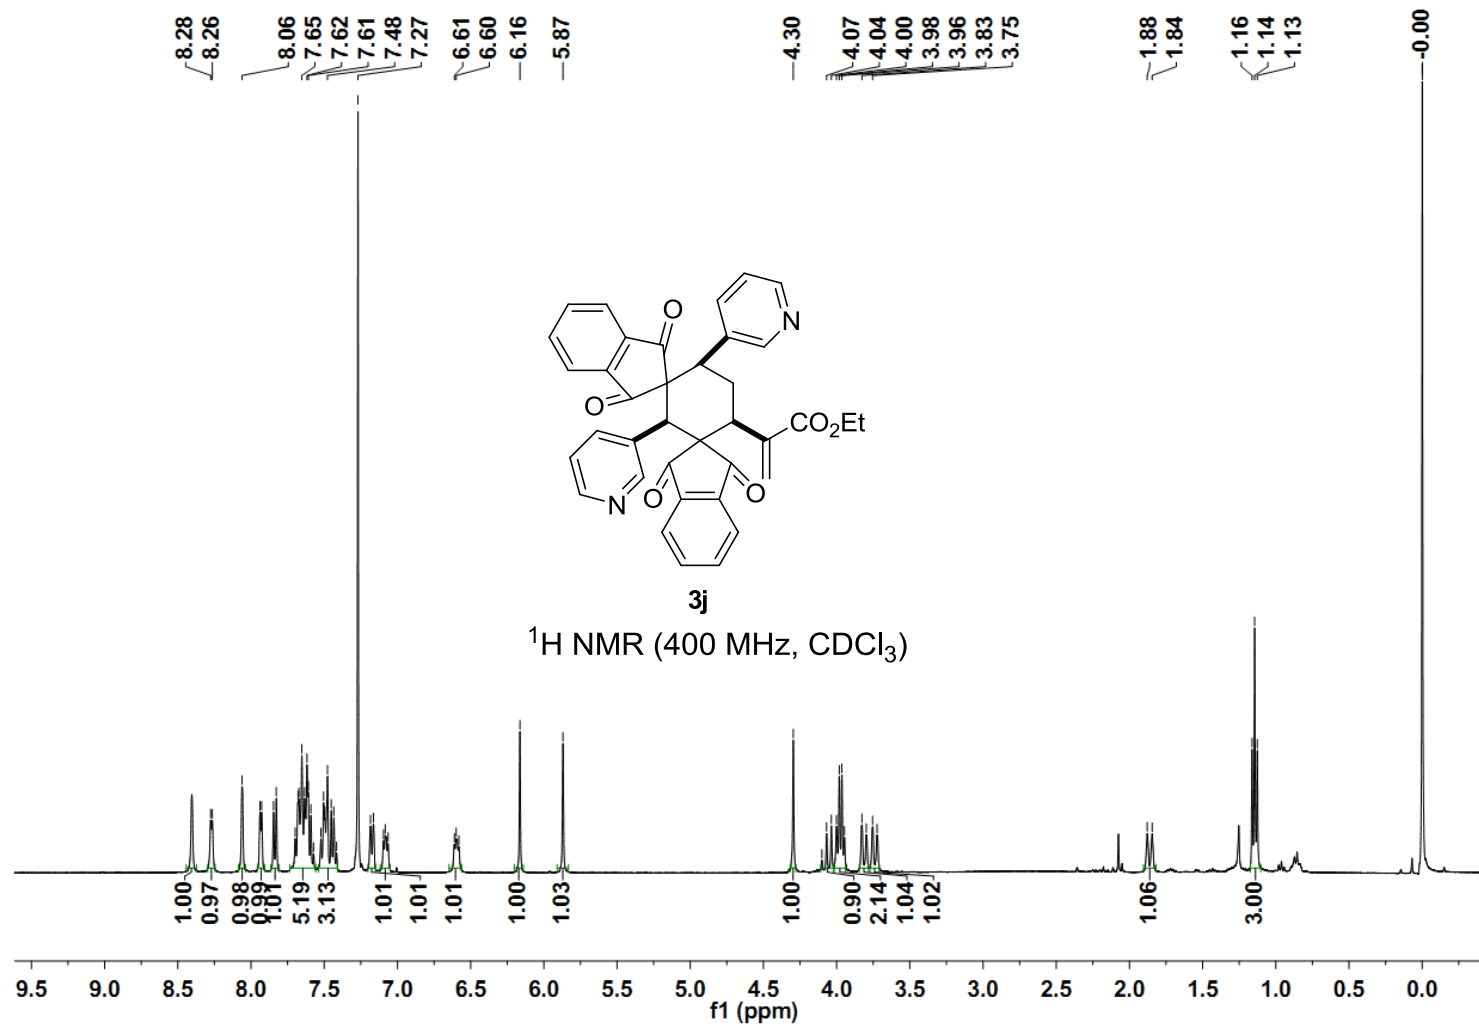

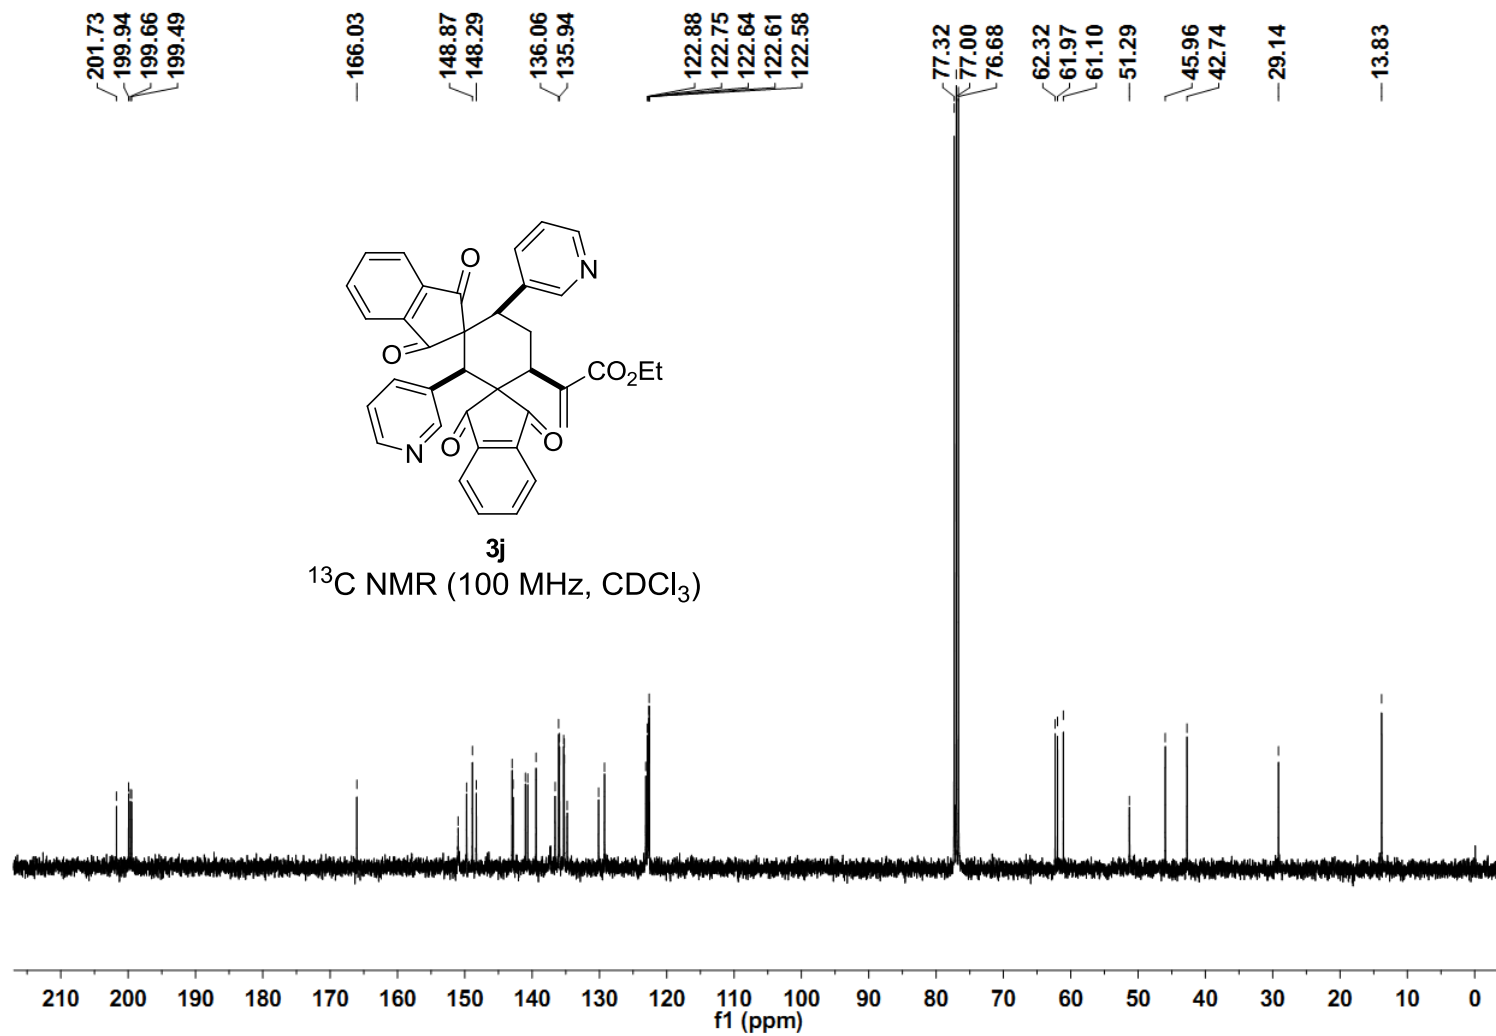

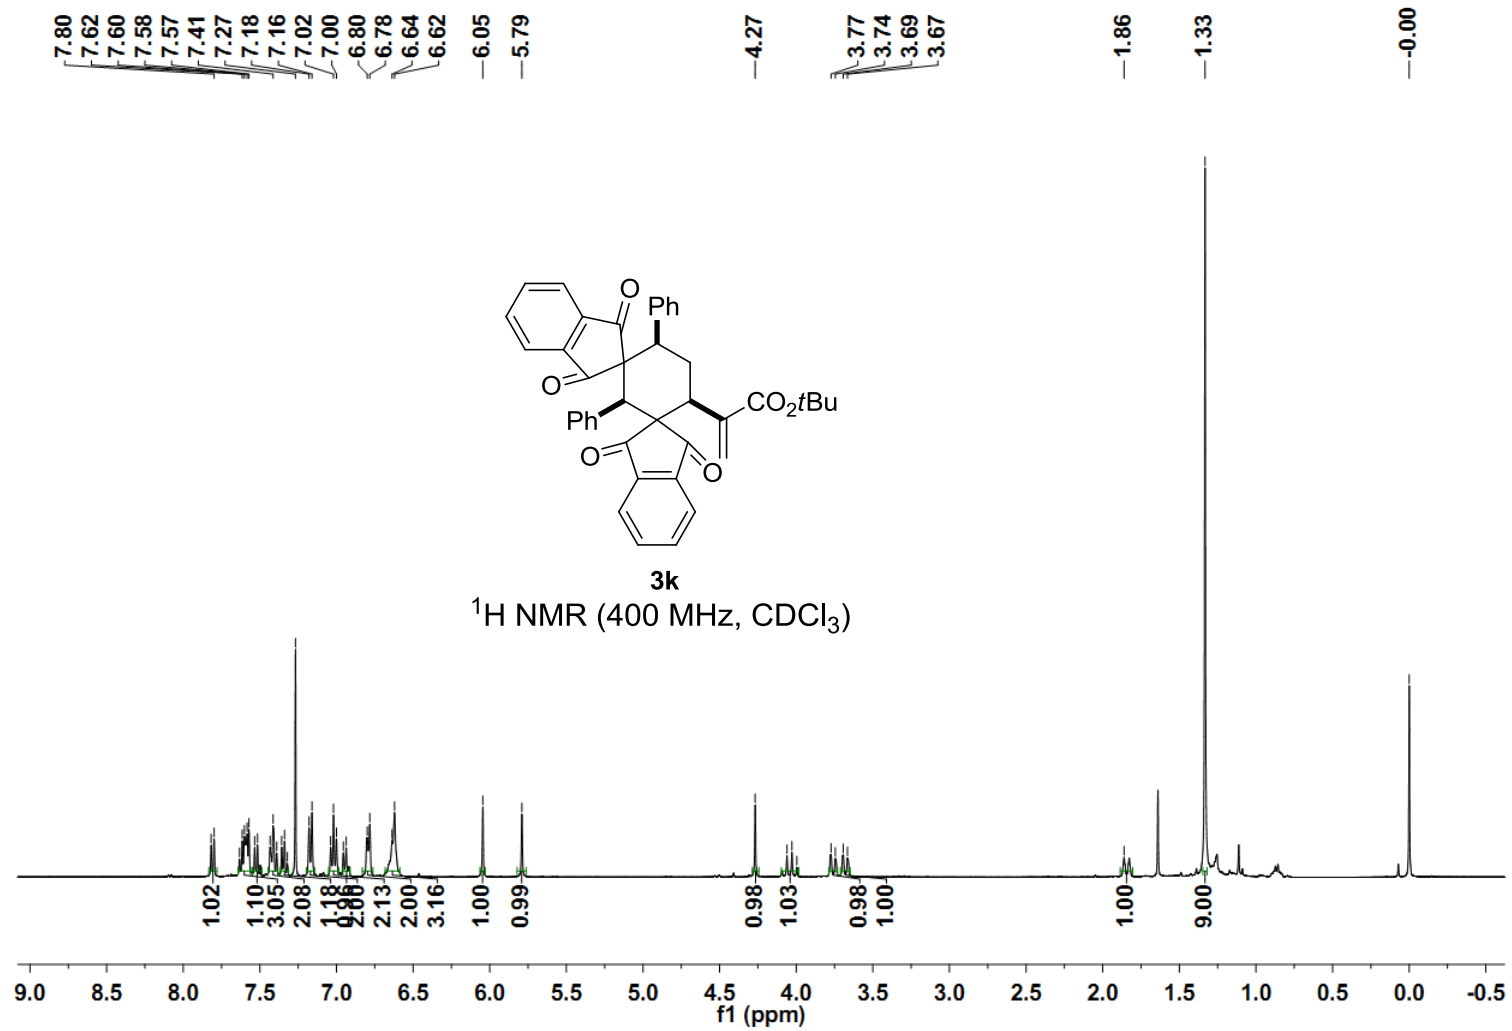

202.97  
200.94  
200.26  
200.17

165.56

135.49  
135.10  
134.61  
134.33

122.62  
122.26  
122.06

81.04

63.17  
62.29

54.49  
48.96

42.77

29.76  
27.63

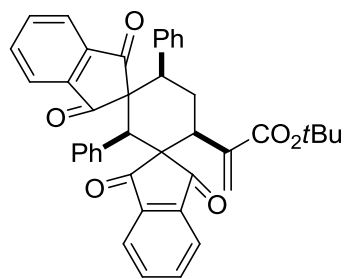

3k

$^{13}\text{C}$  NMR (100 MHz,  $\text{CDCl}_3$ )

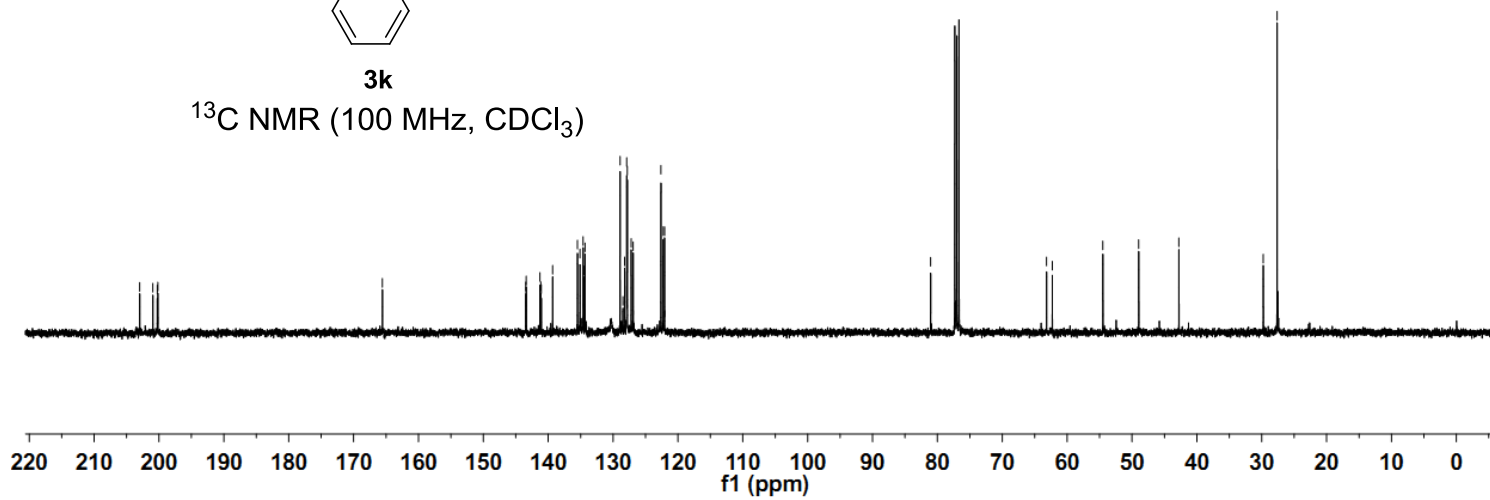



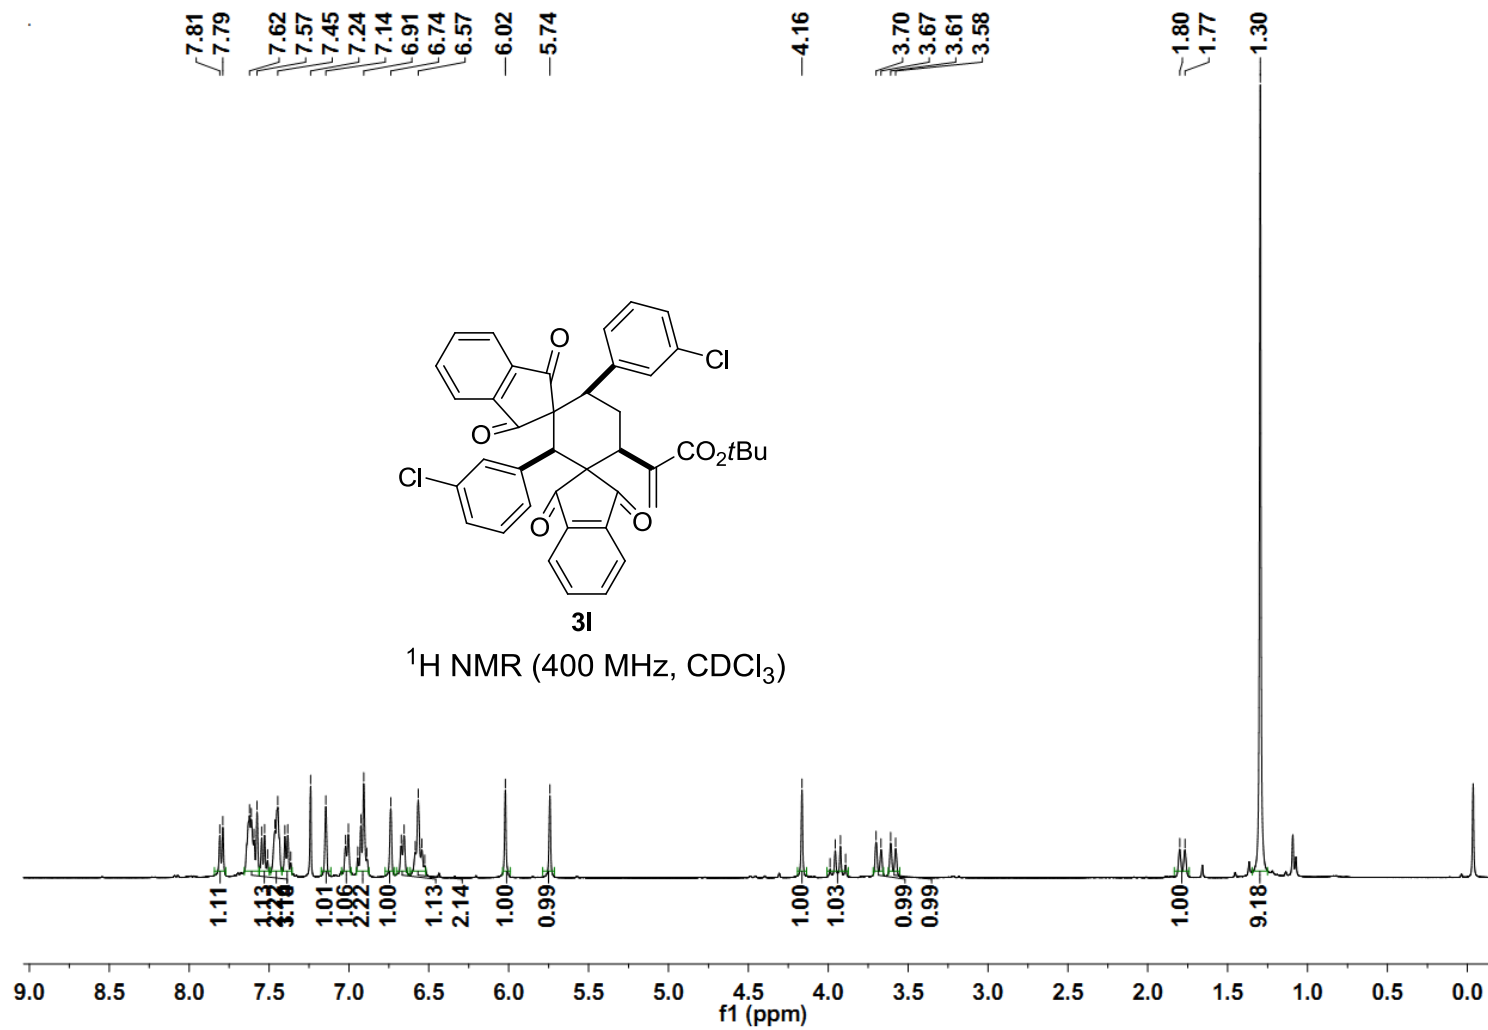

202.24  
200.38  
199.77  
199.58

165.36

141.21  
140.91  
140.86

122.81  
122.72  
122.45  
122.31

81.19  
77.32  
77.00  
76.68

62.00  
53.88  
48.34  
42.62

29.54  
27.63

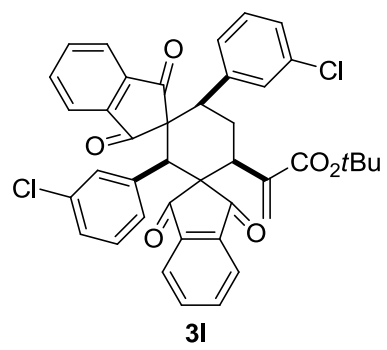

<sup>13</sup>C NMR (100 MHz, CDCl<sub>3</sub>)

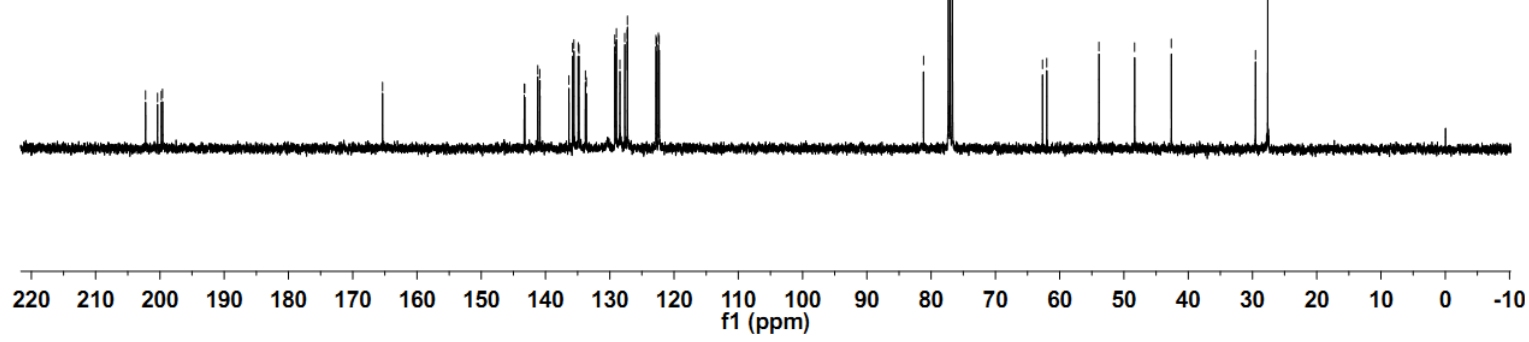

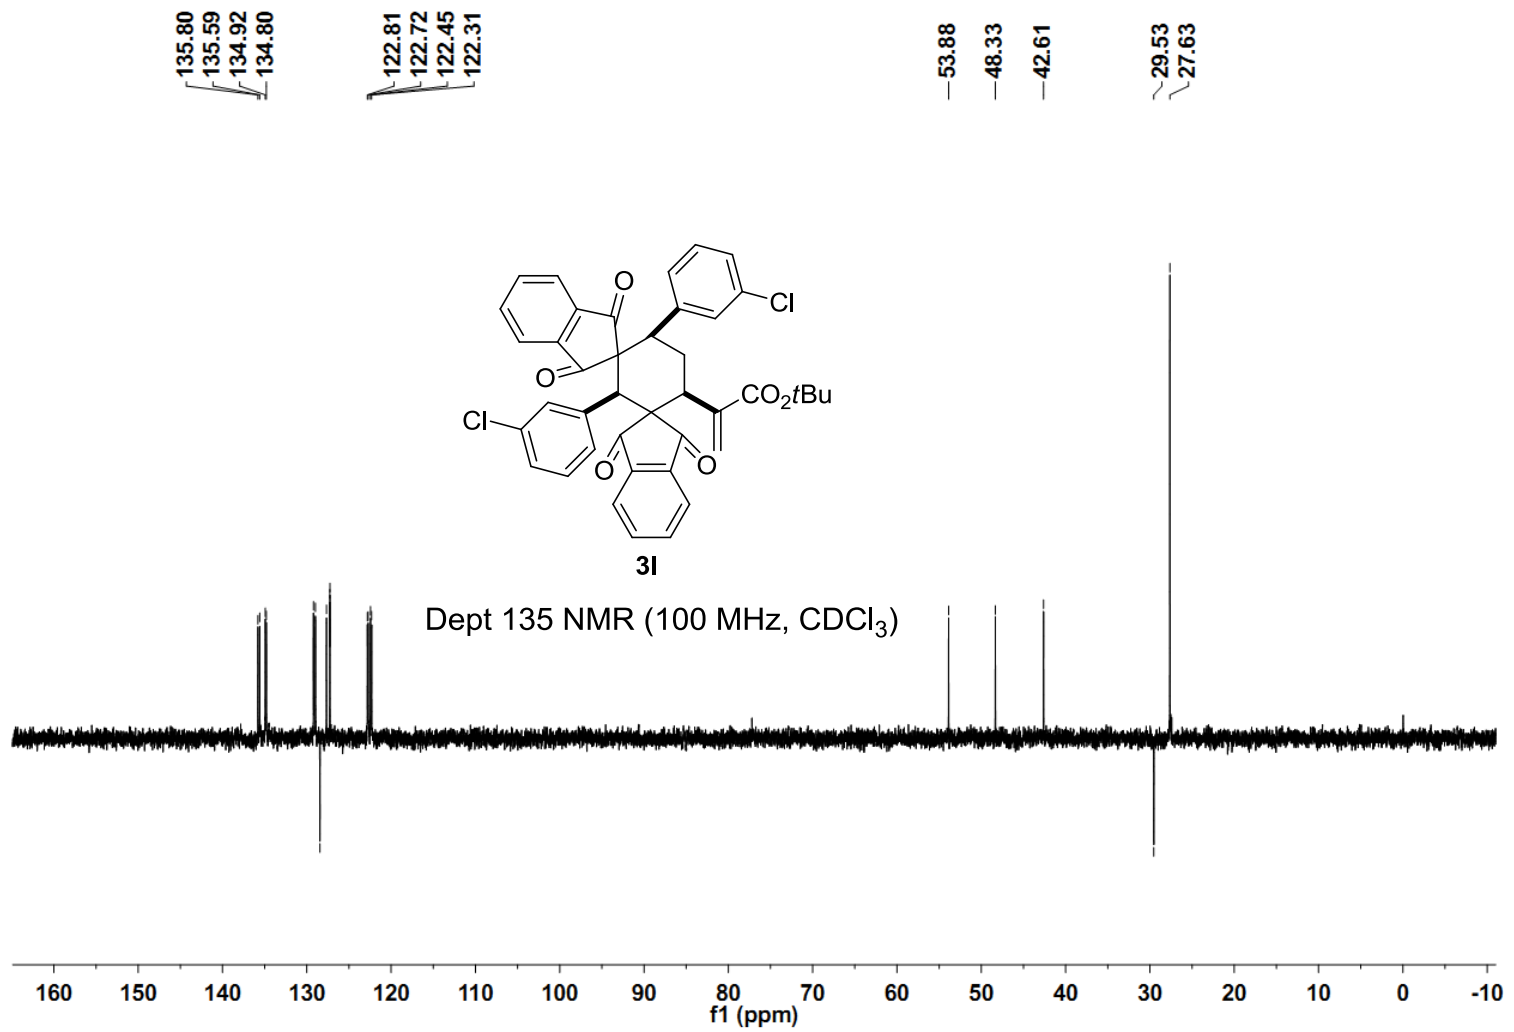

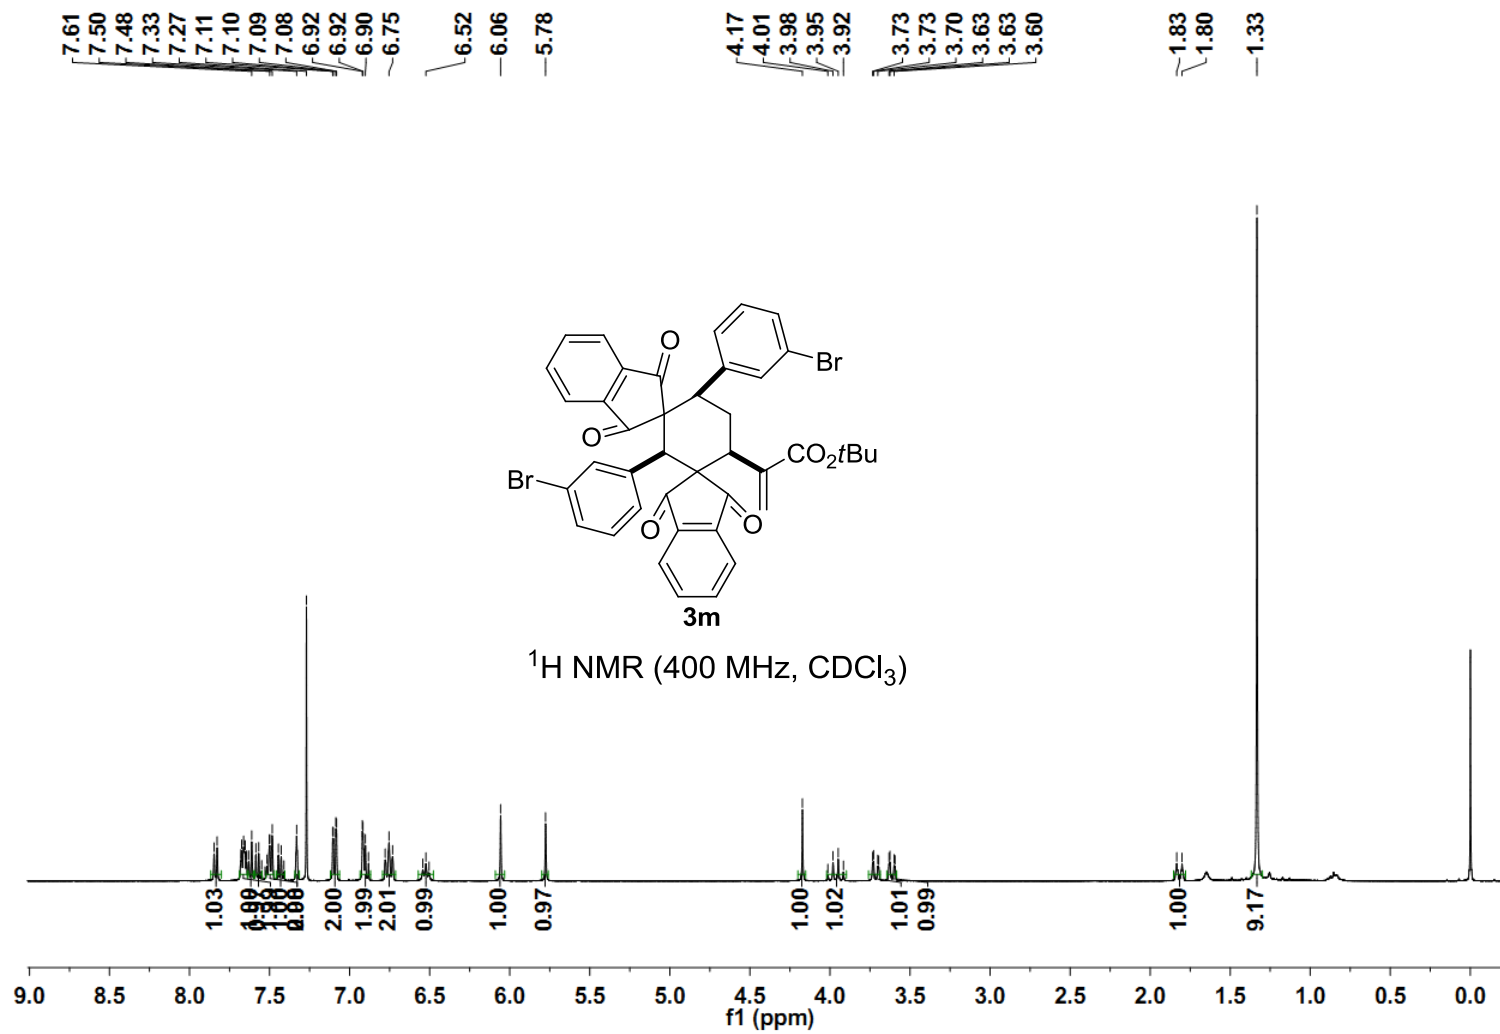

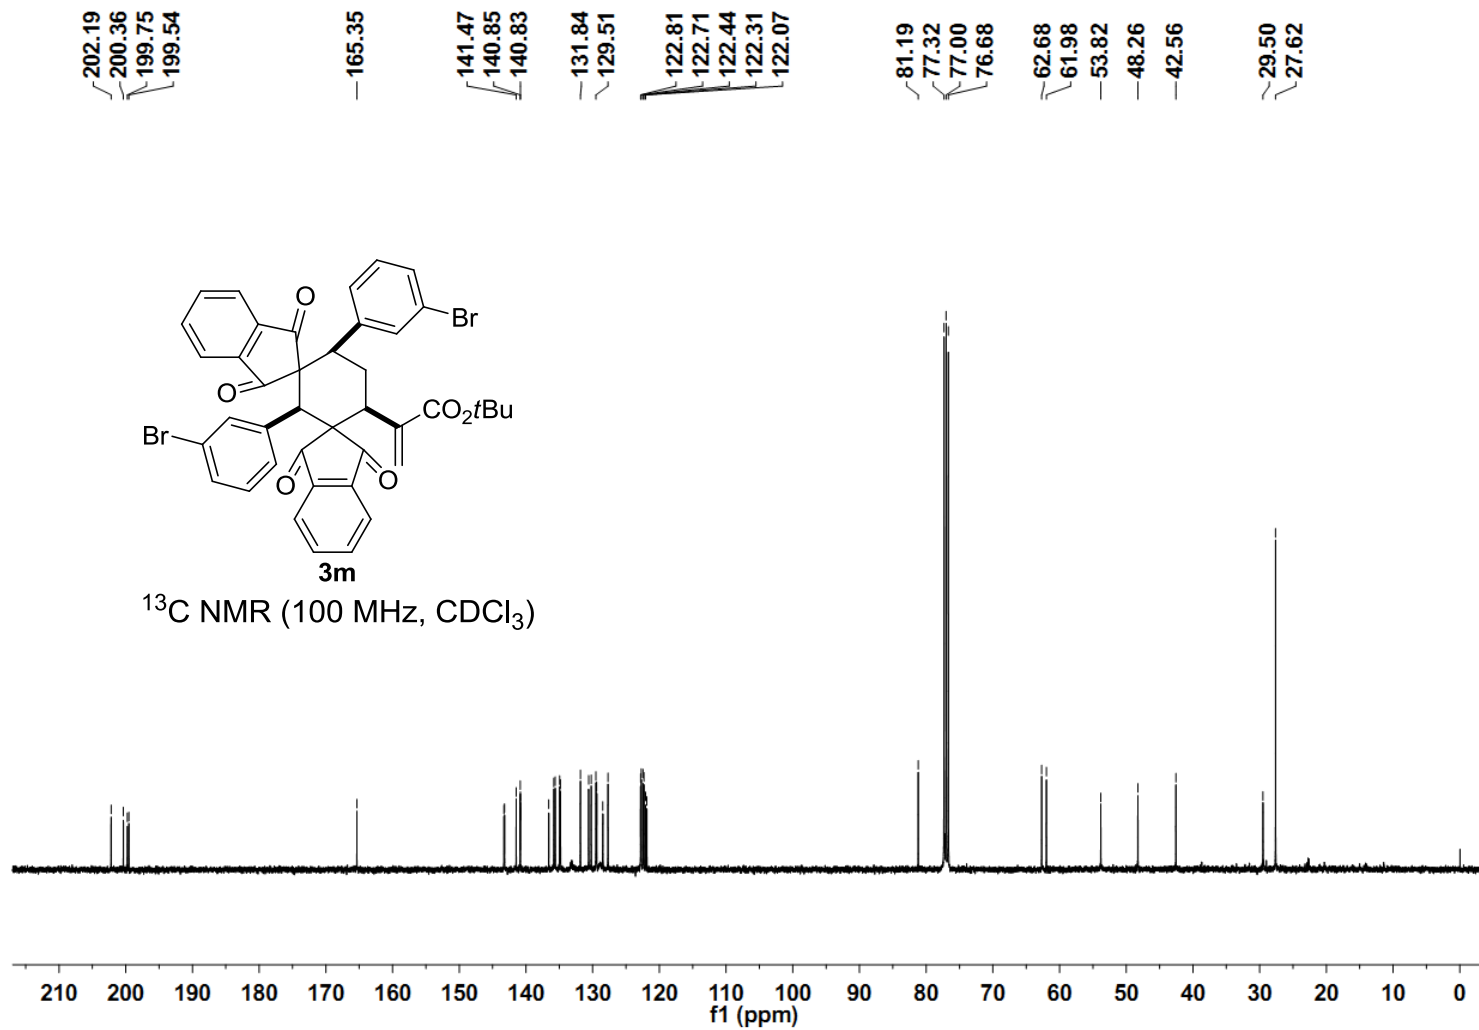

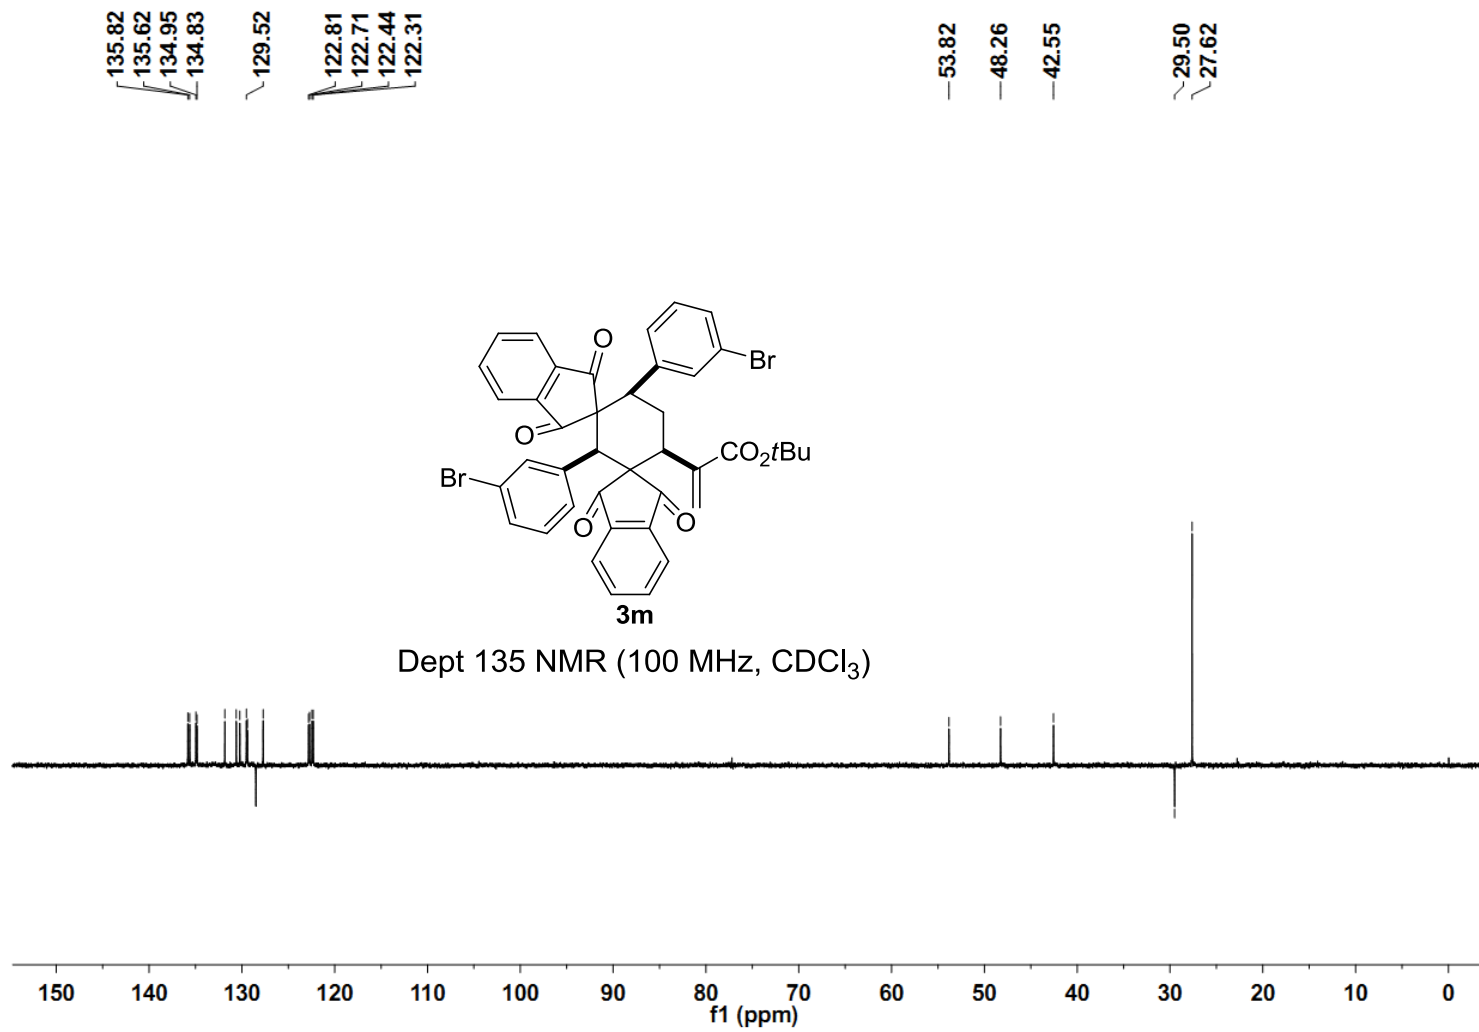

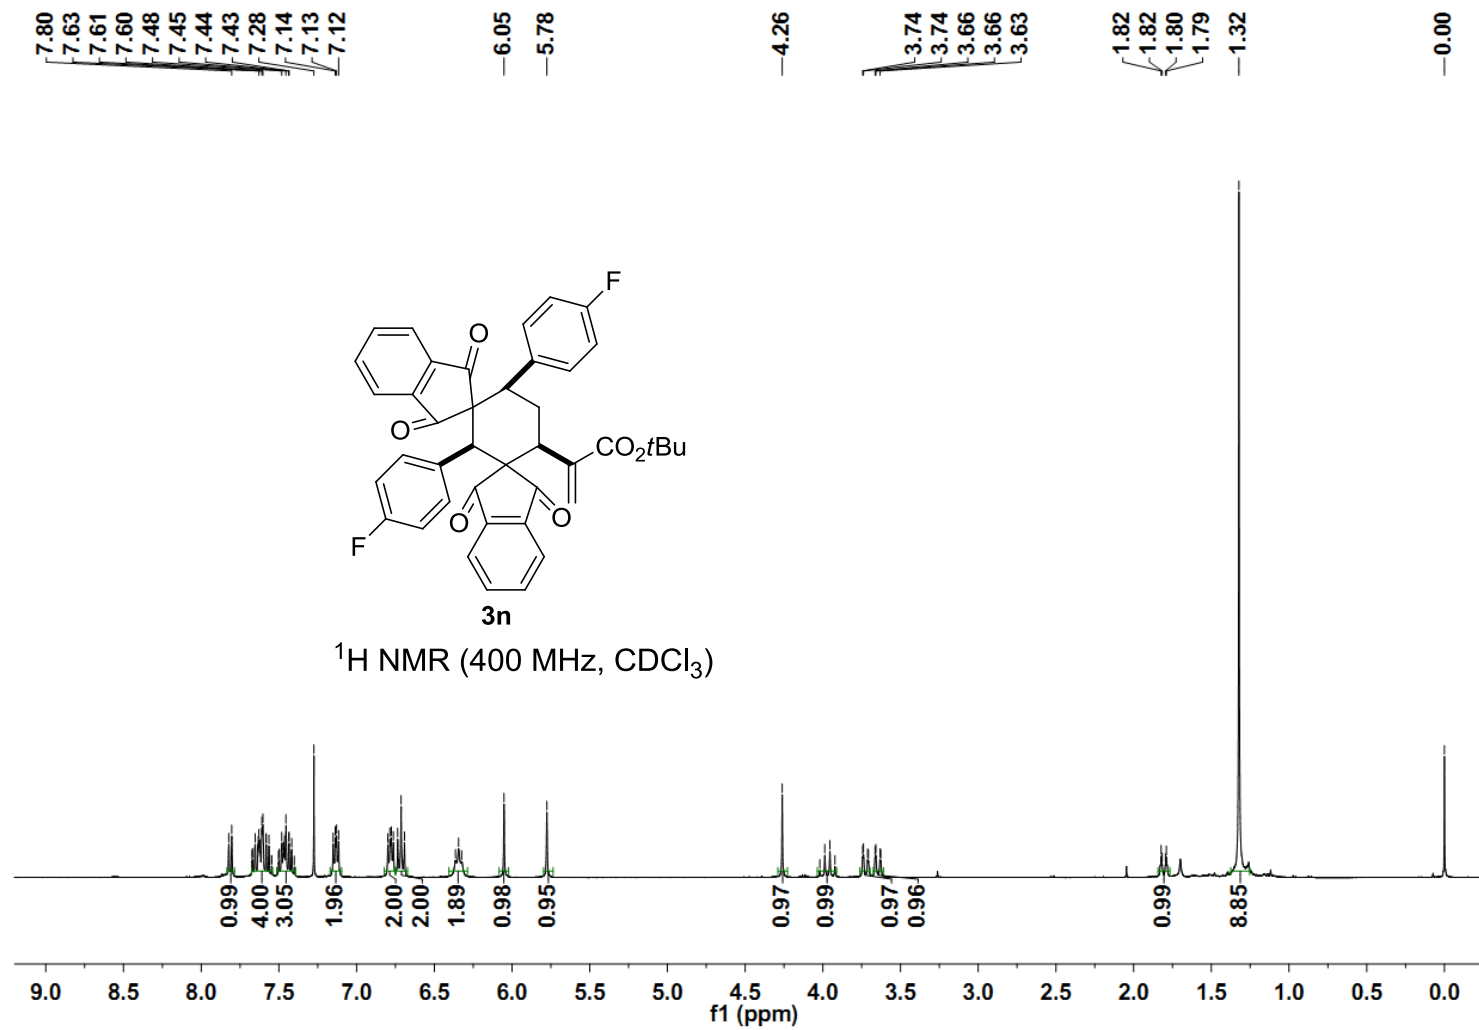

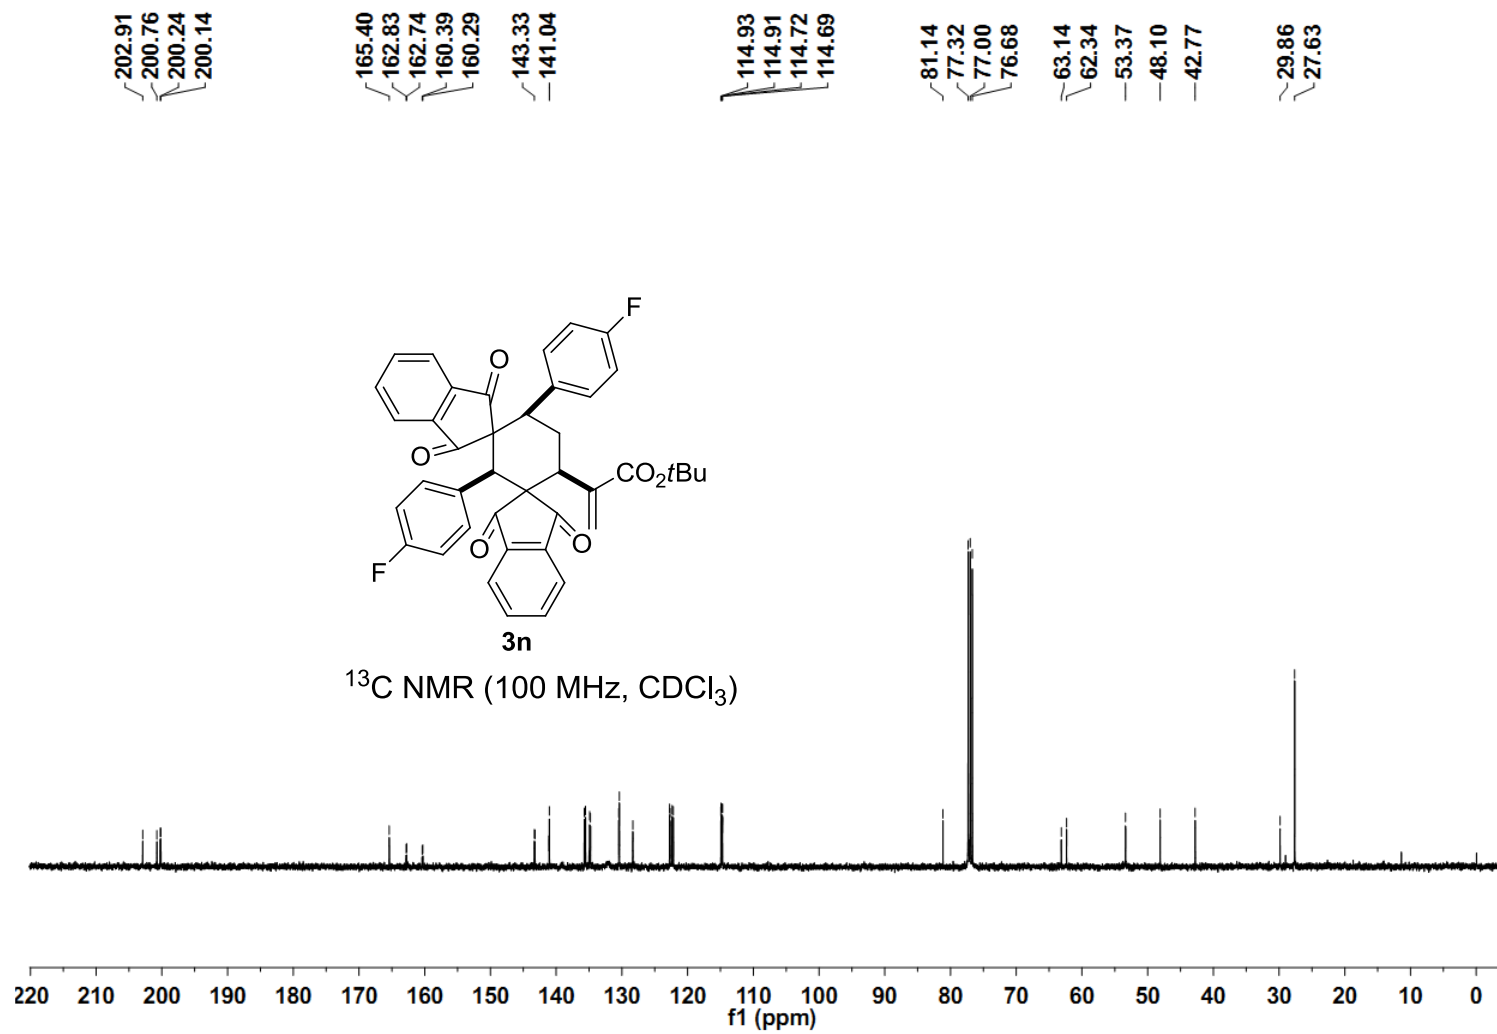



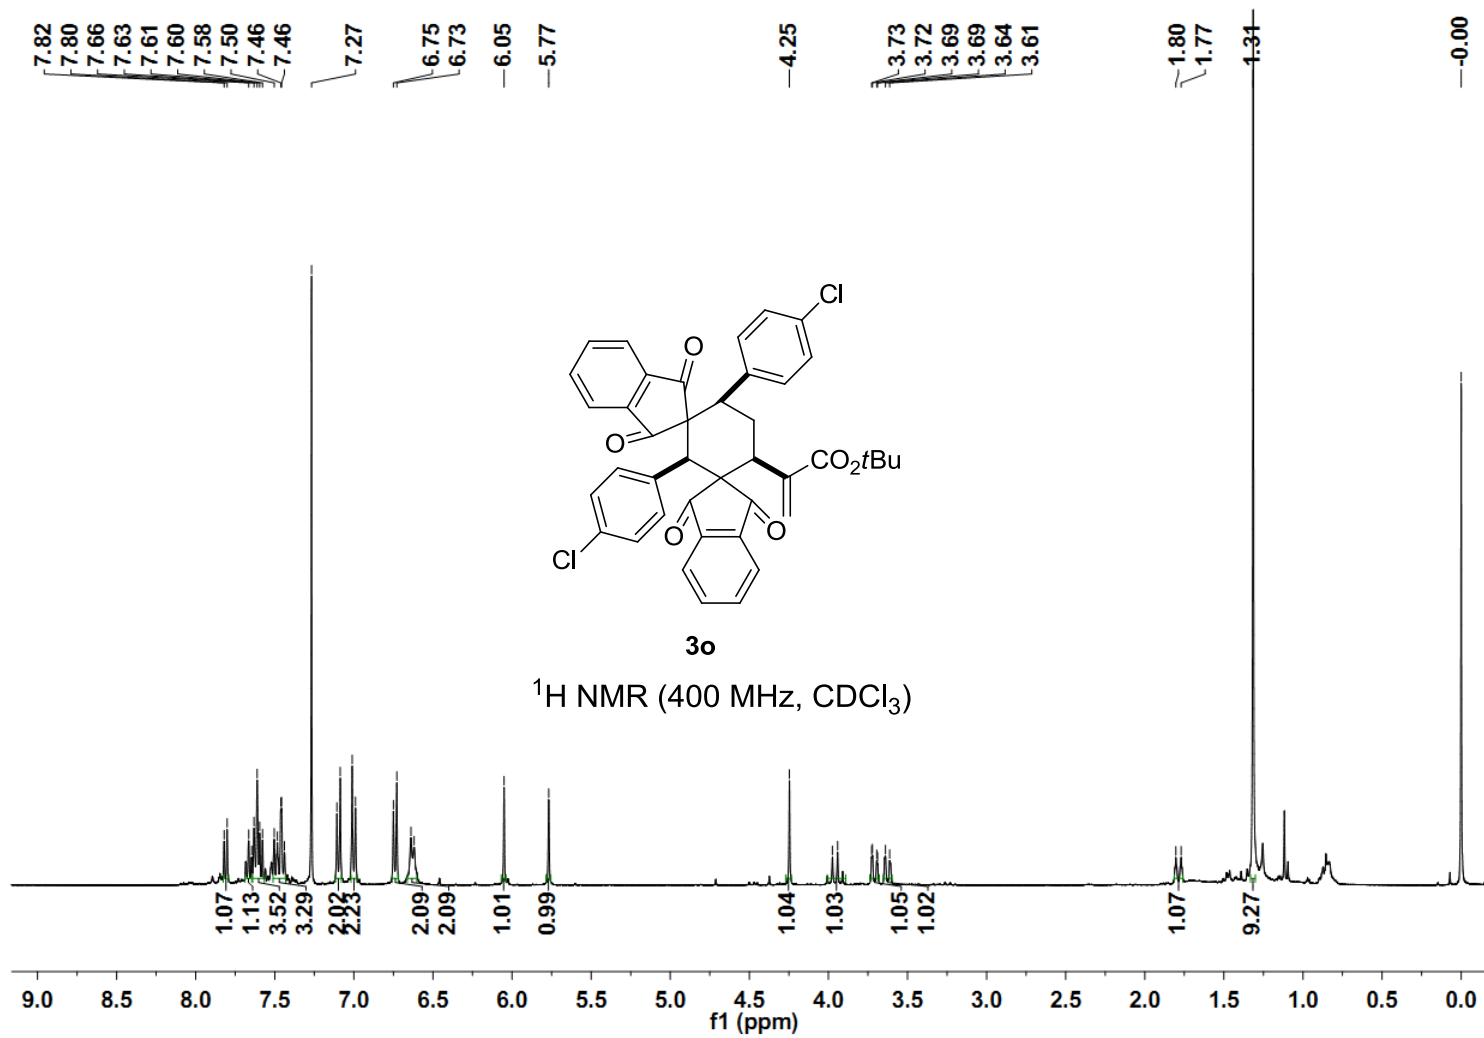

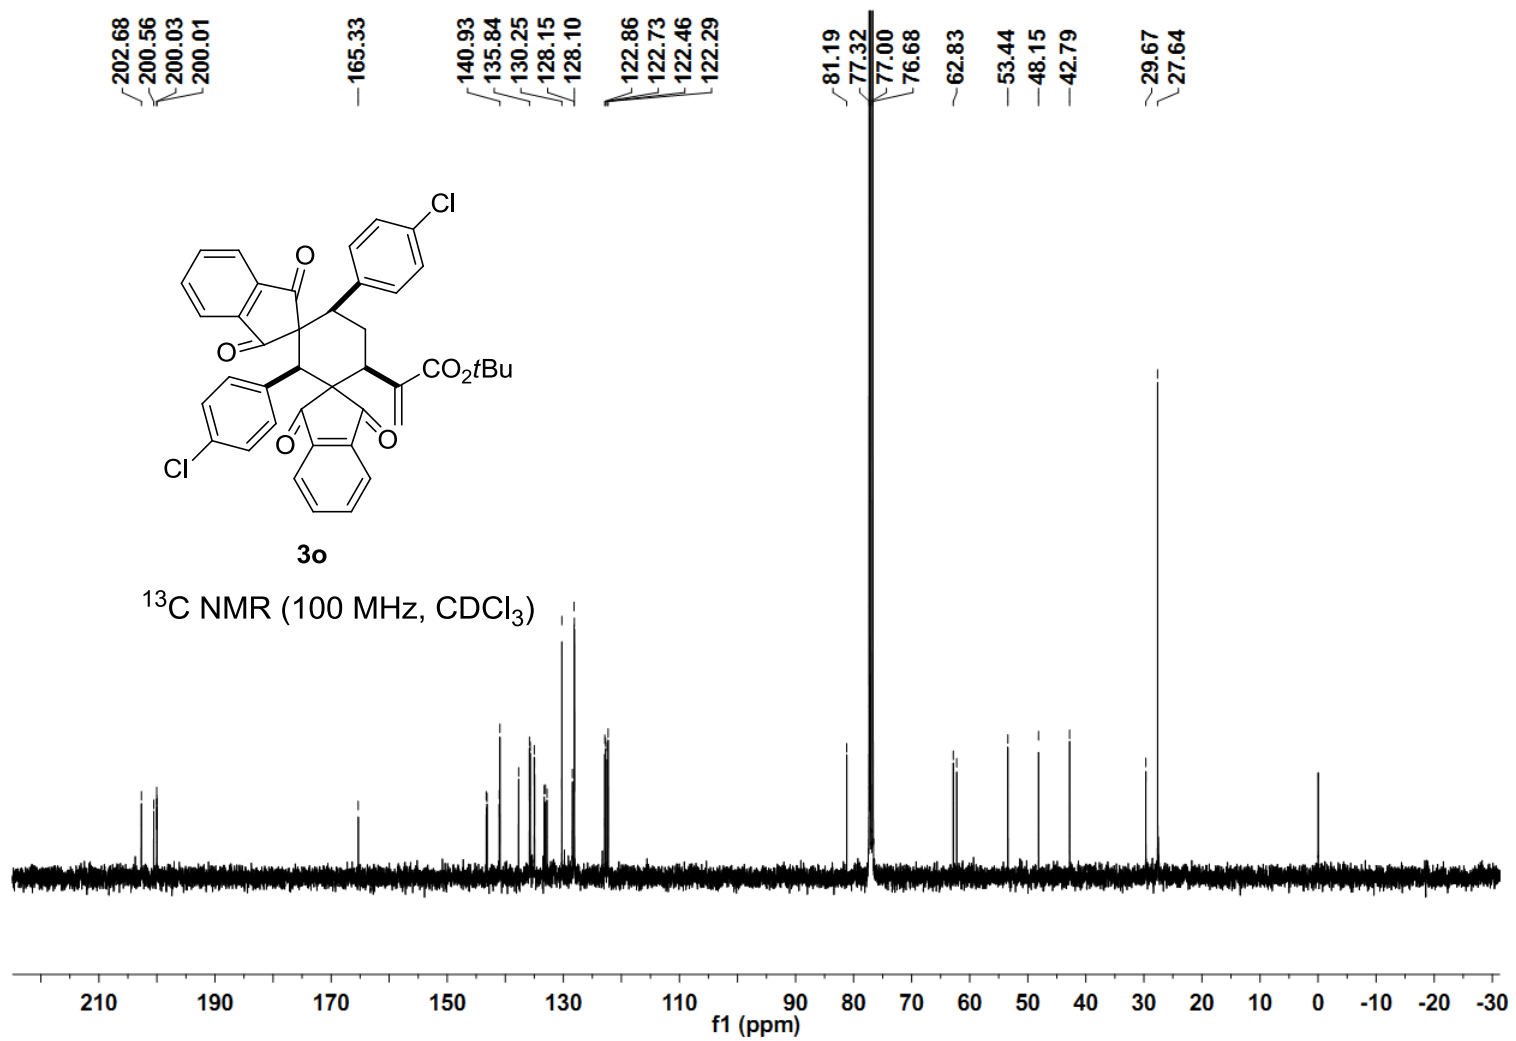

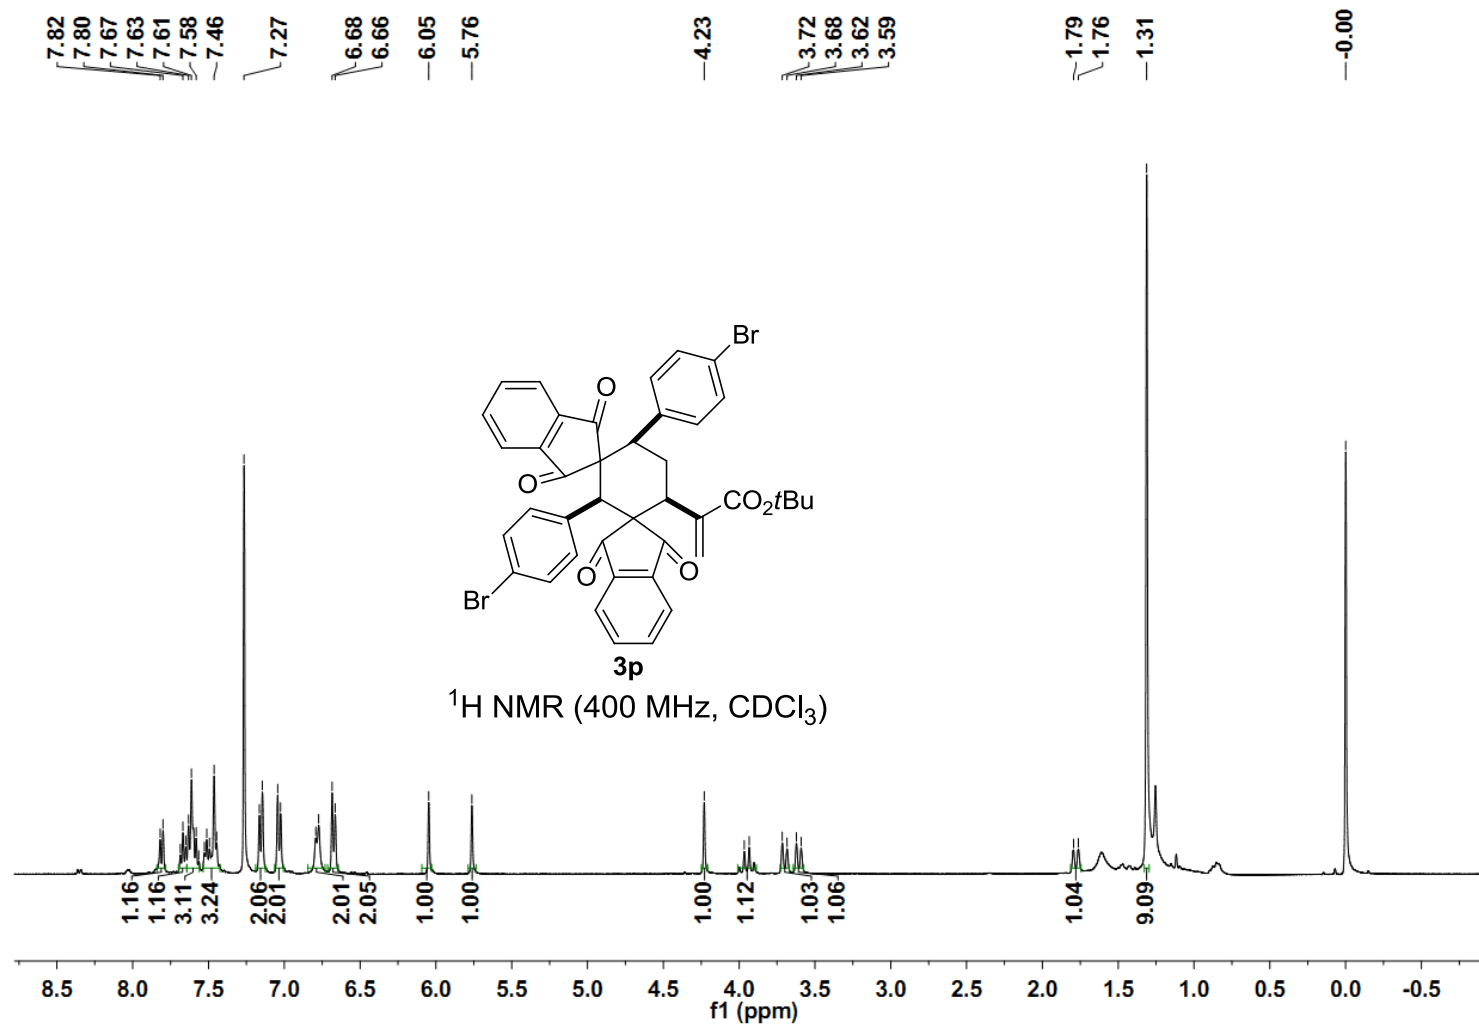

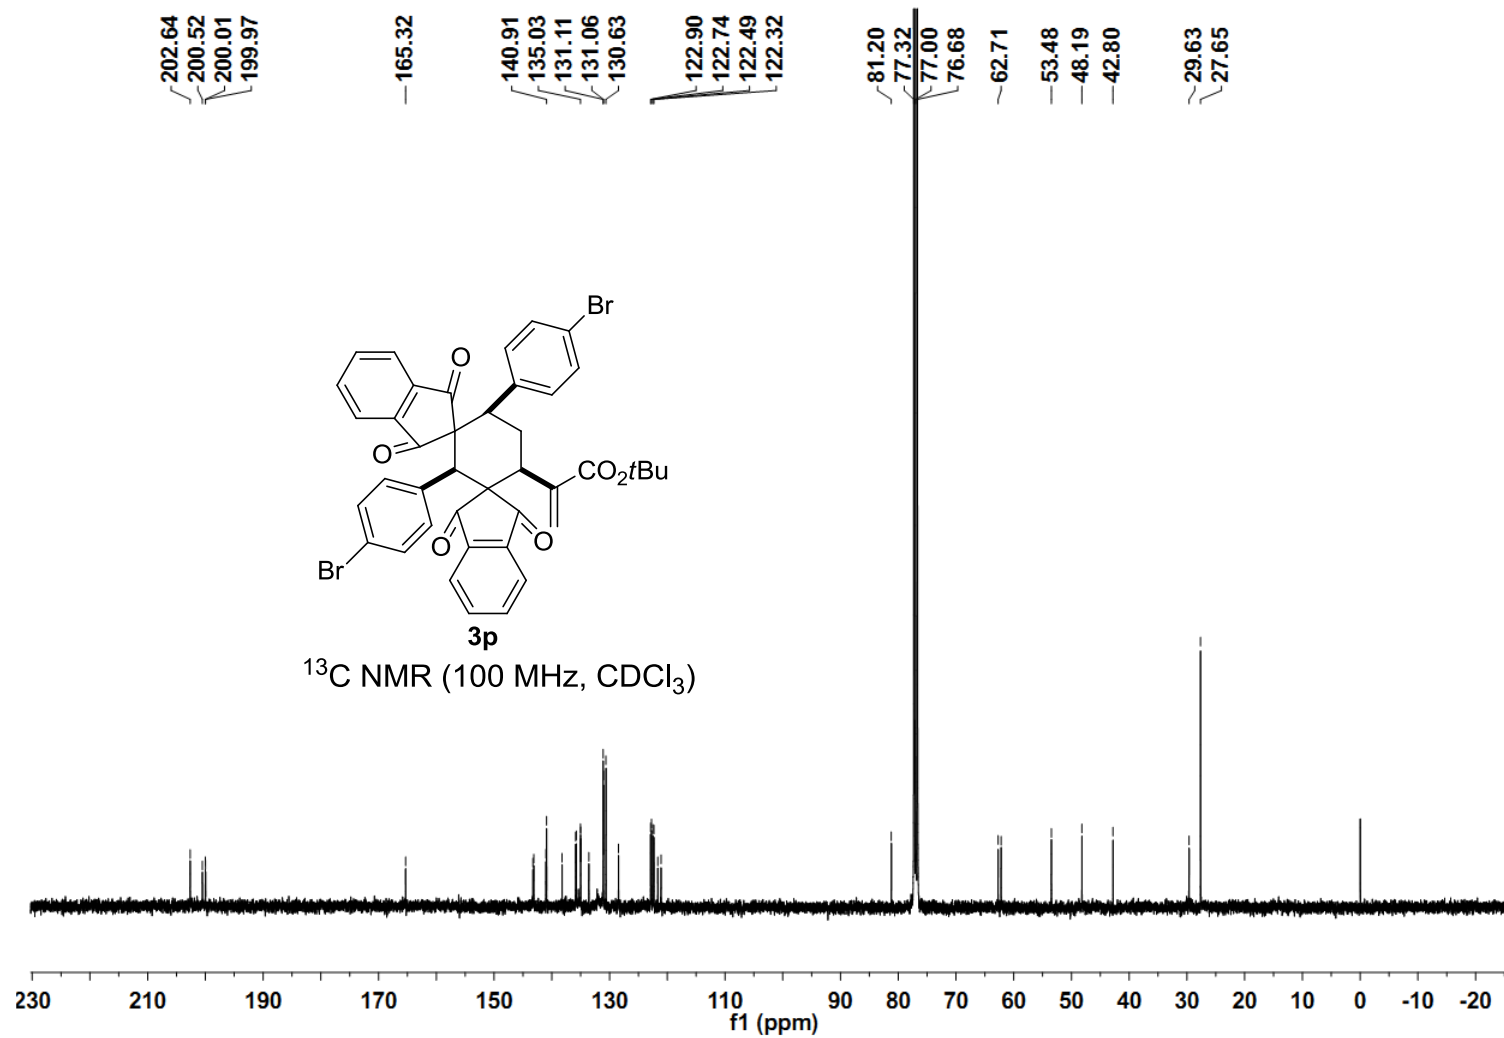

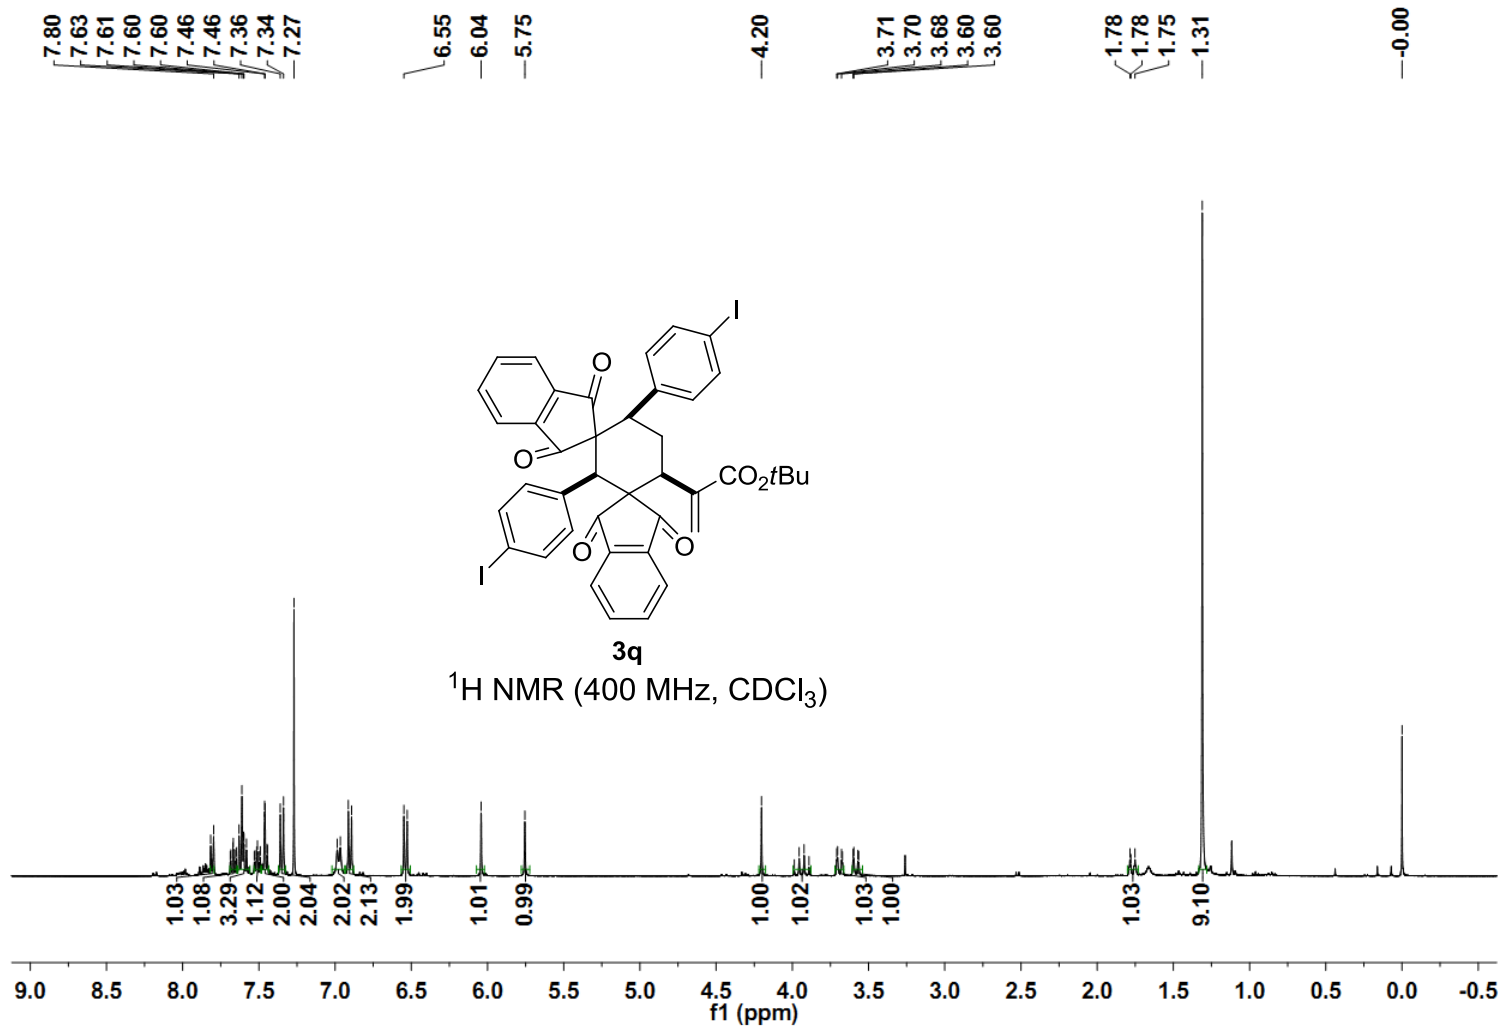

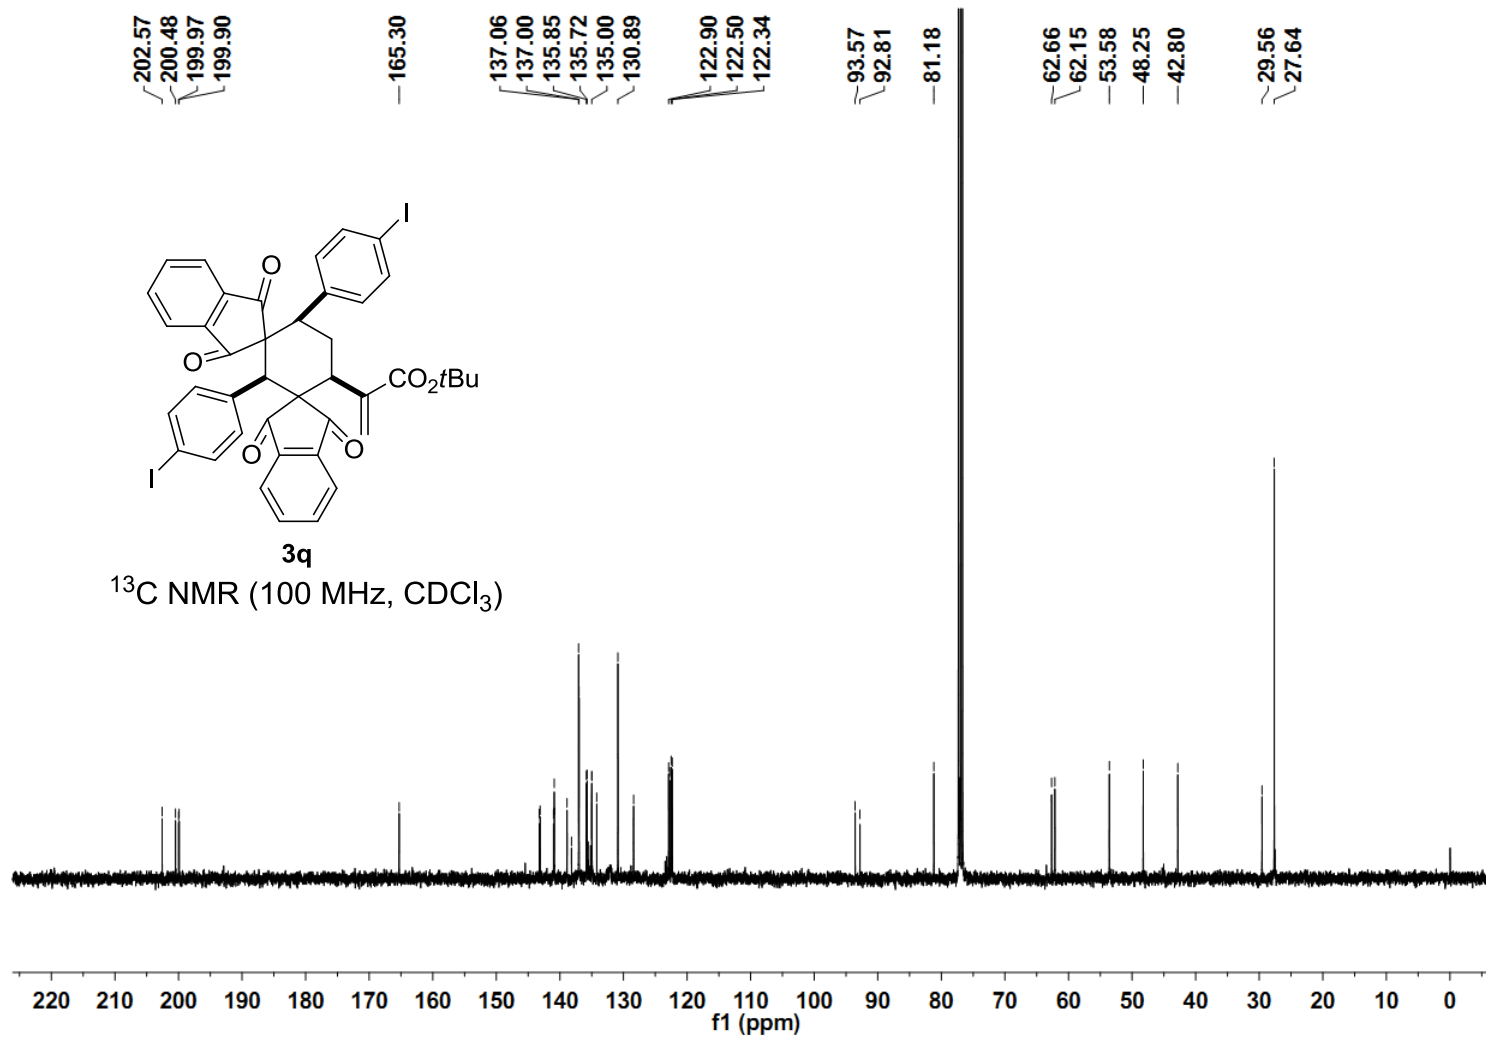

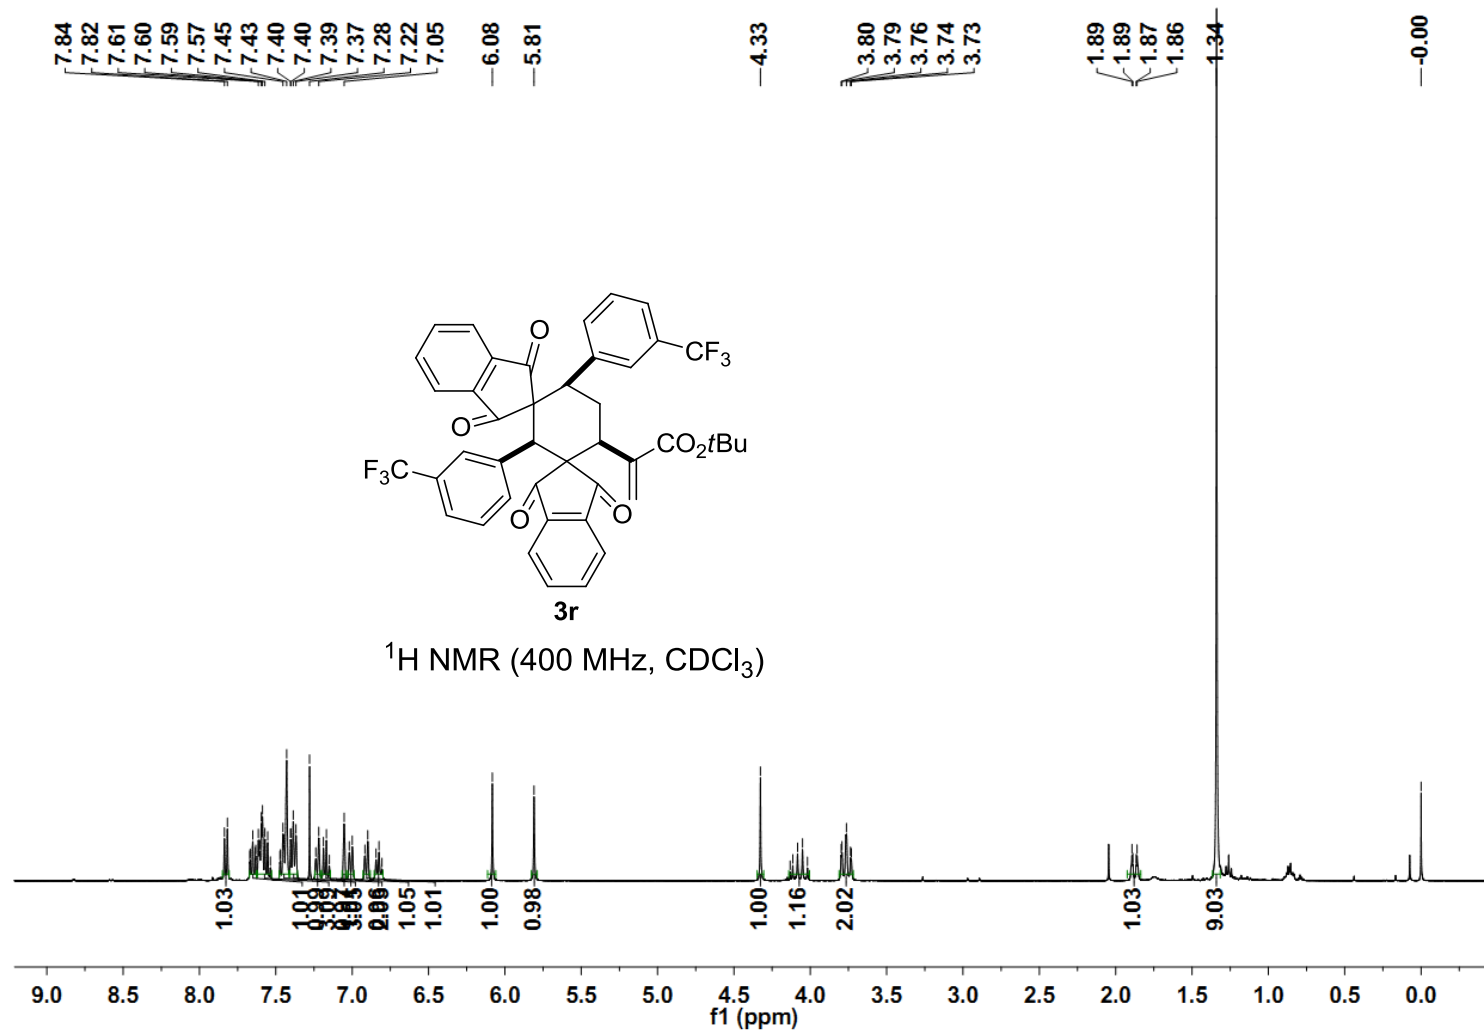

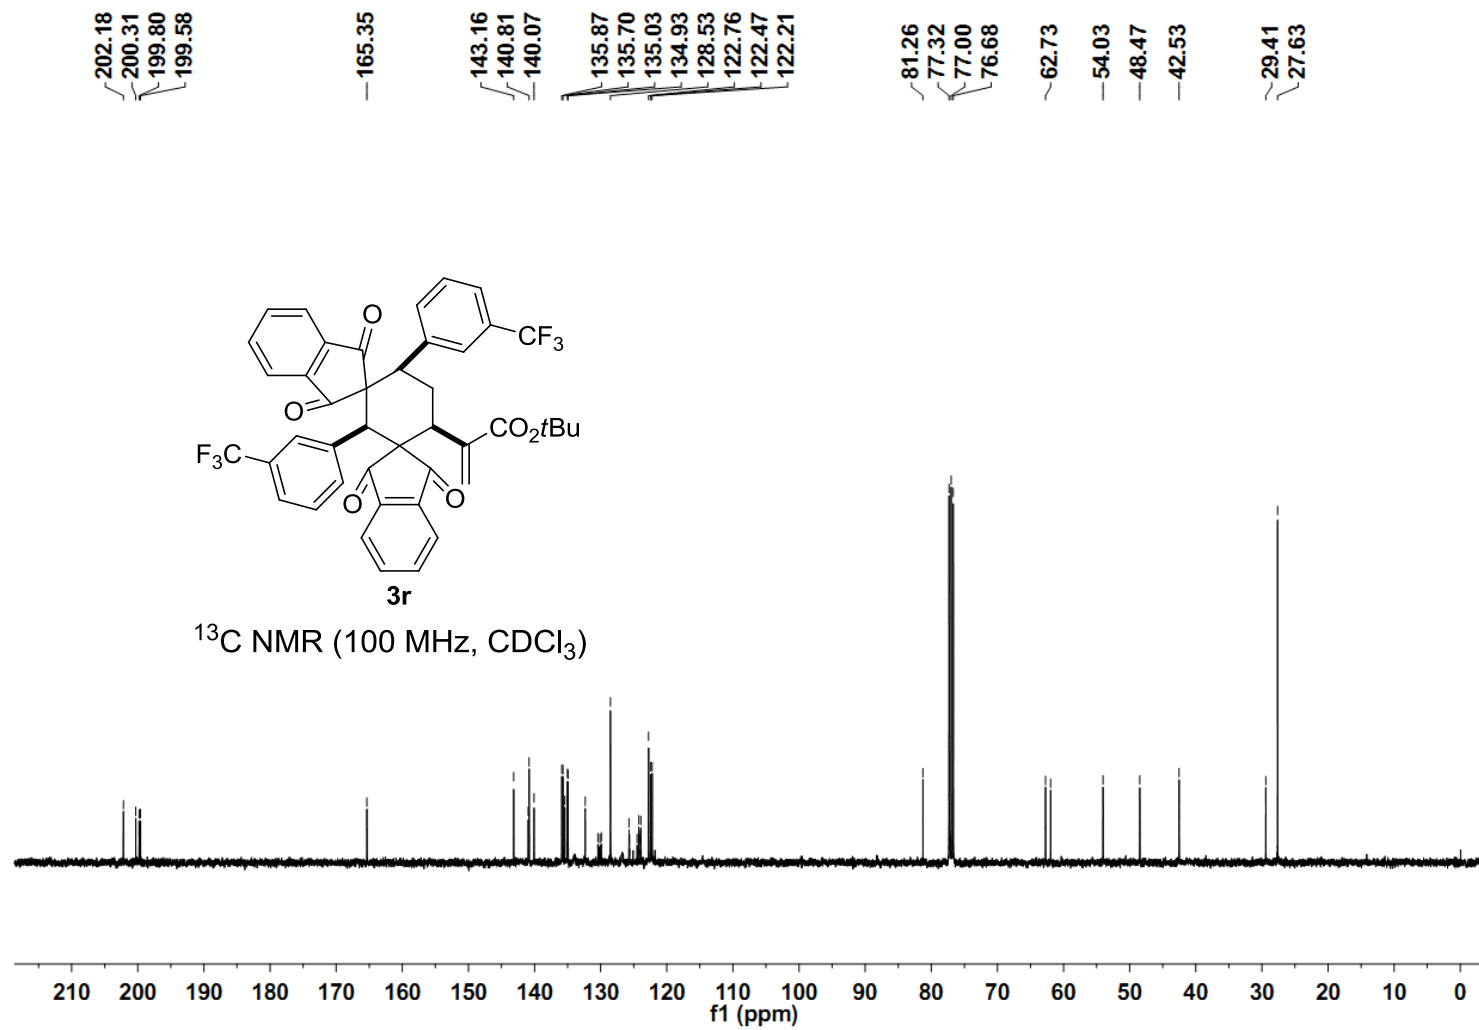



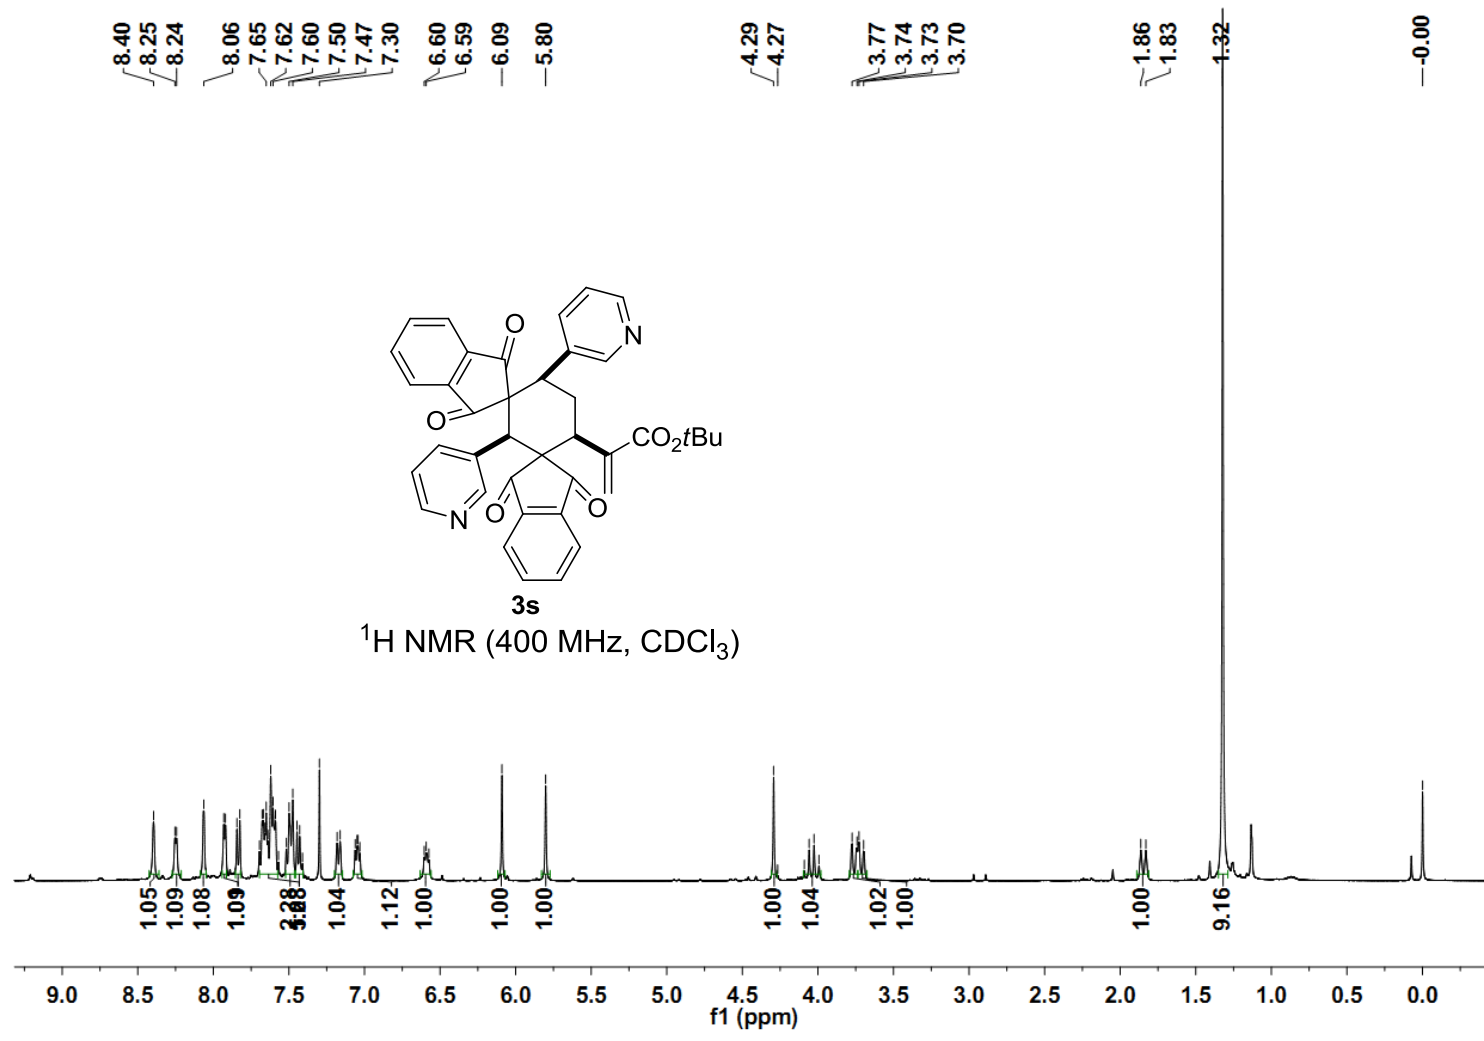

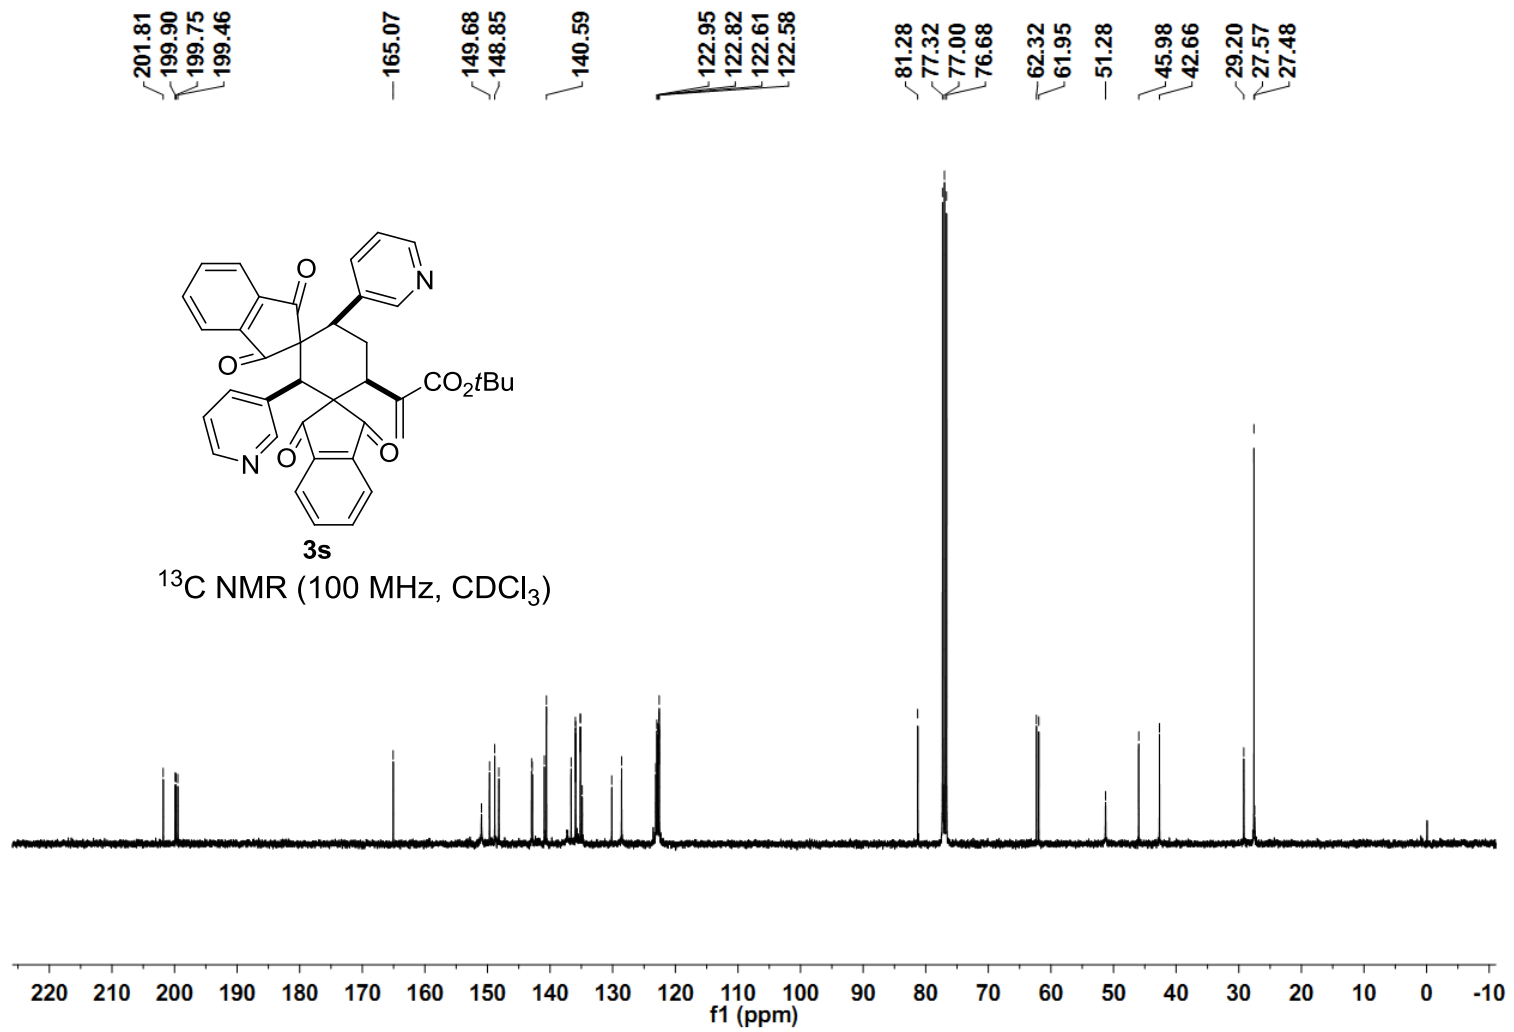

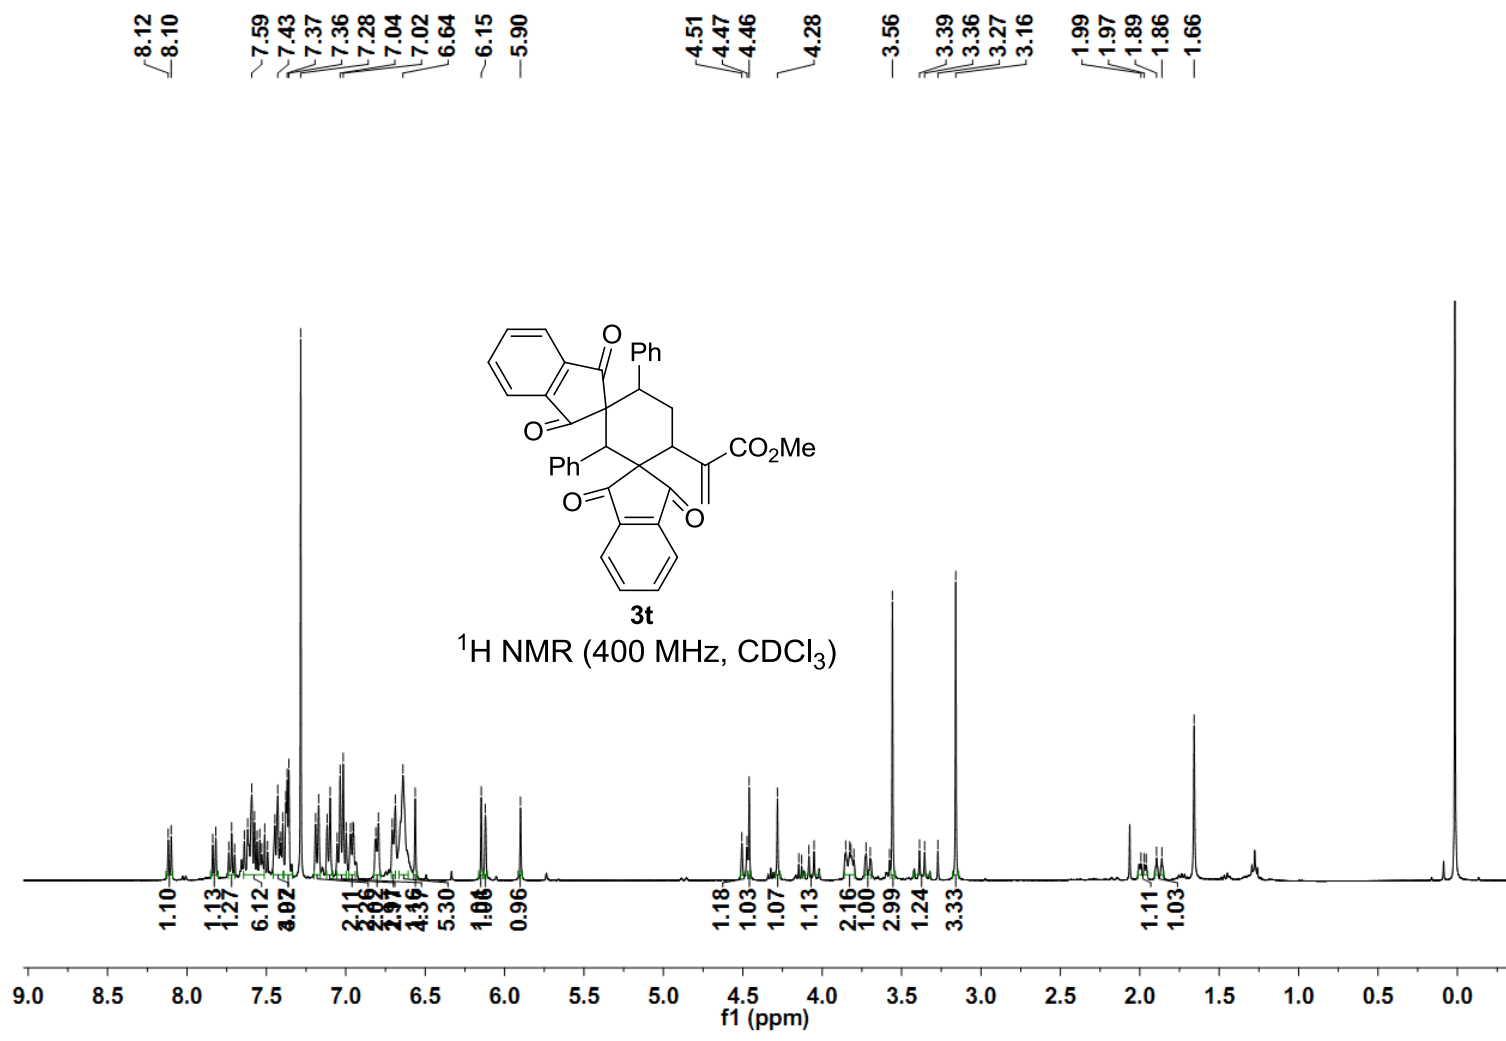

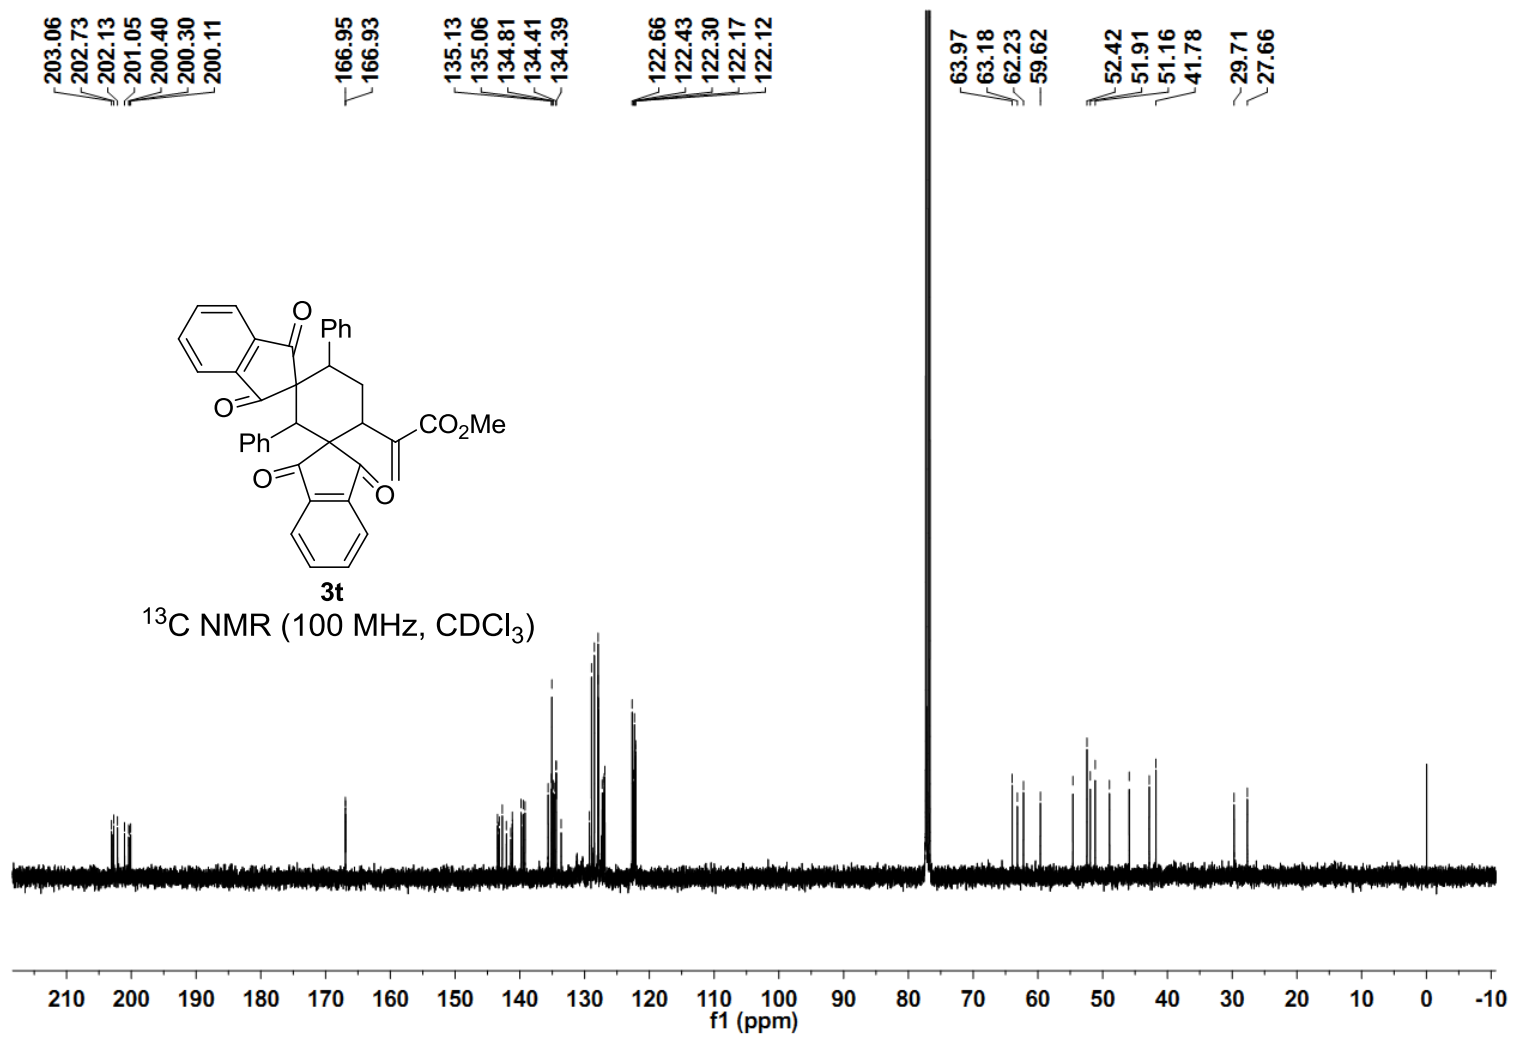

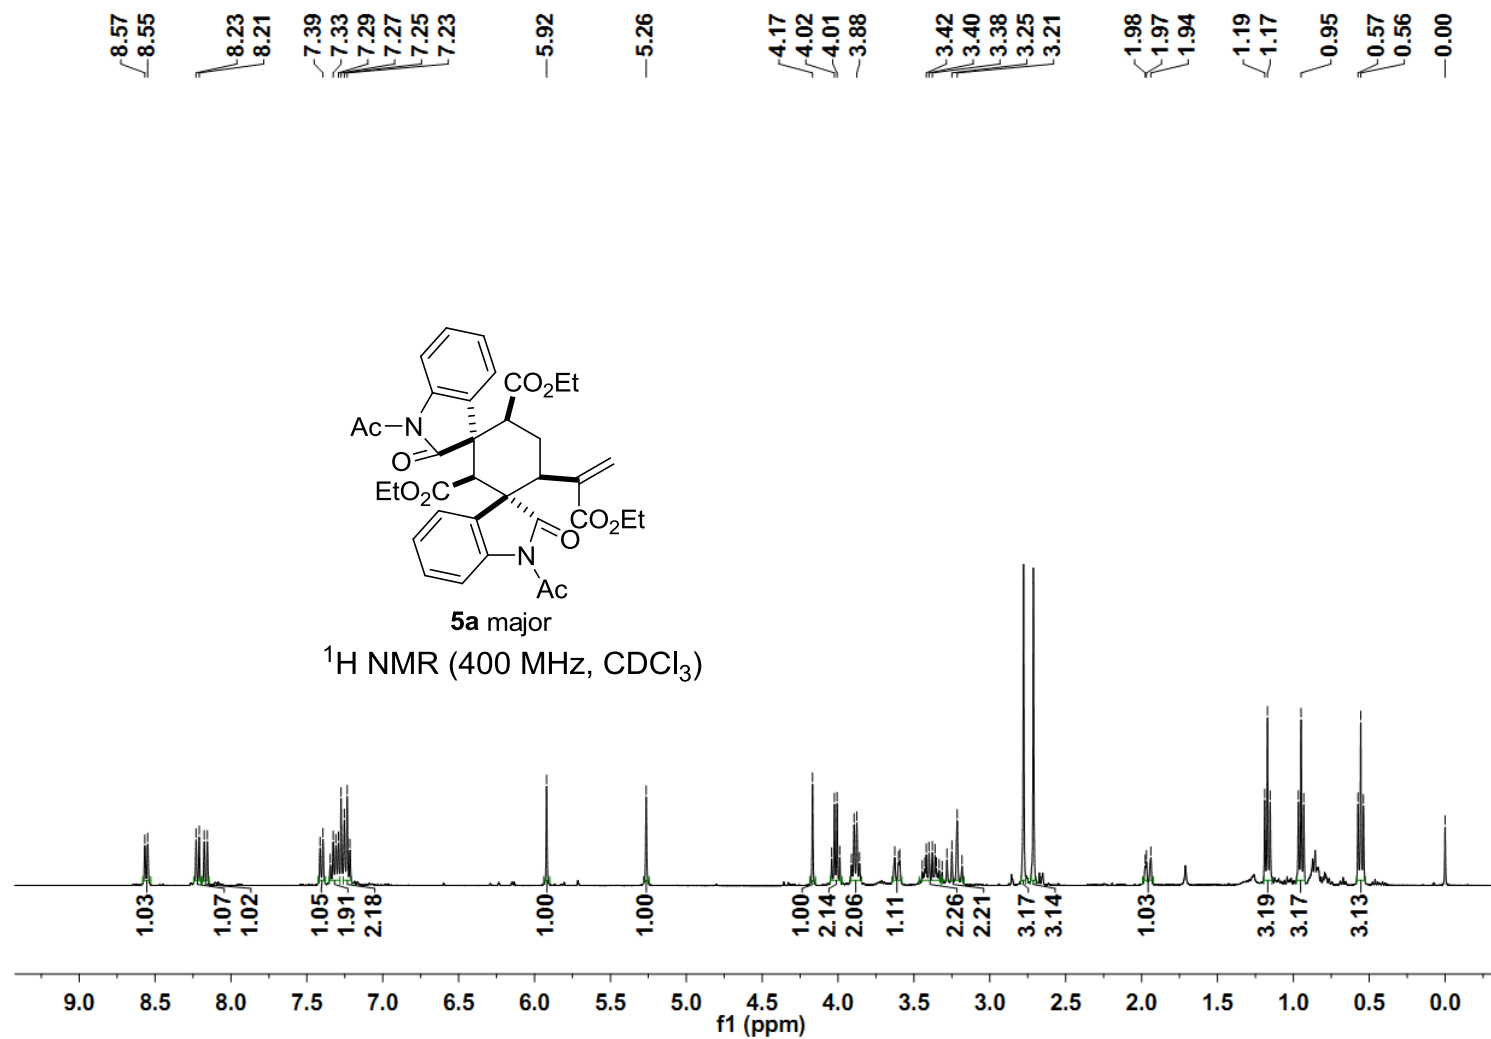

180.25  
178.01  
171.06  
170.78  
170.50  
167.85  
140.70  
140.34  
138.46  
128.94  
124.98  
116.39  
115.73  
77.32  
77.00  
76.68  
61.20  
61.06  
52.74  
48.55  
45.64  
26.74  
26.66  
26.42  
13.97  
13.63  
12.82

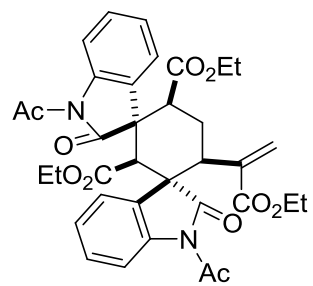

**5a major**

<sup>13</sup>C NMR (100 MHz, CDCl<sub>3</sub>)

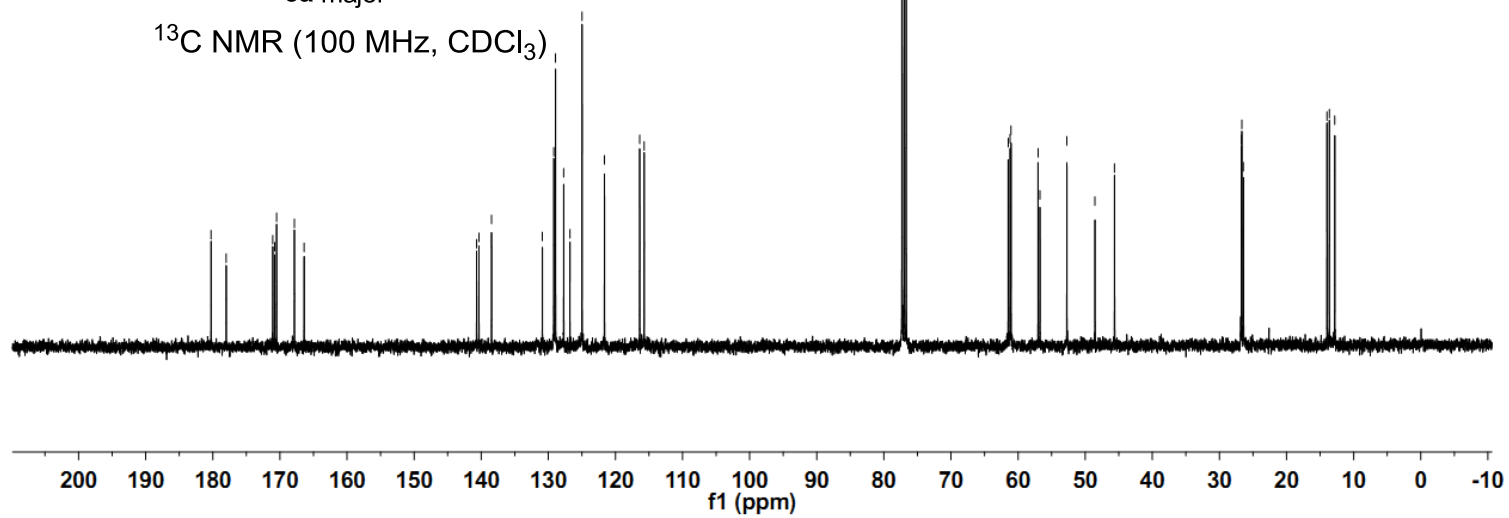

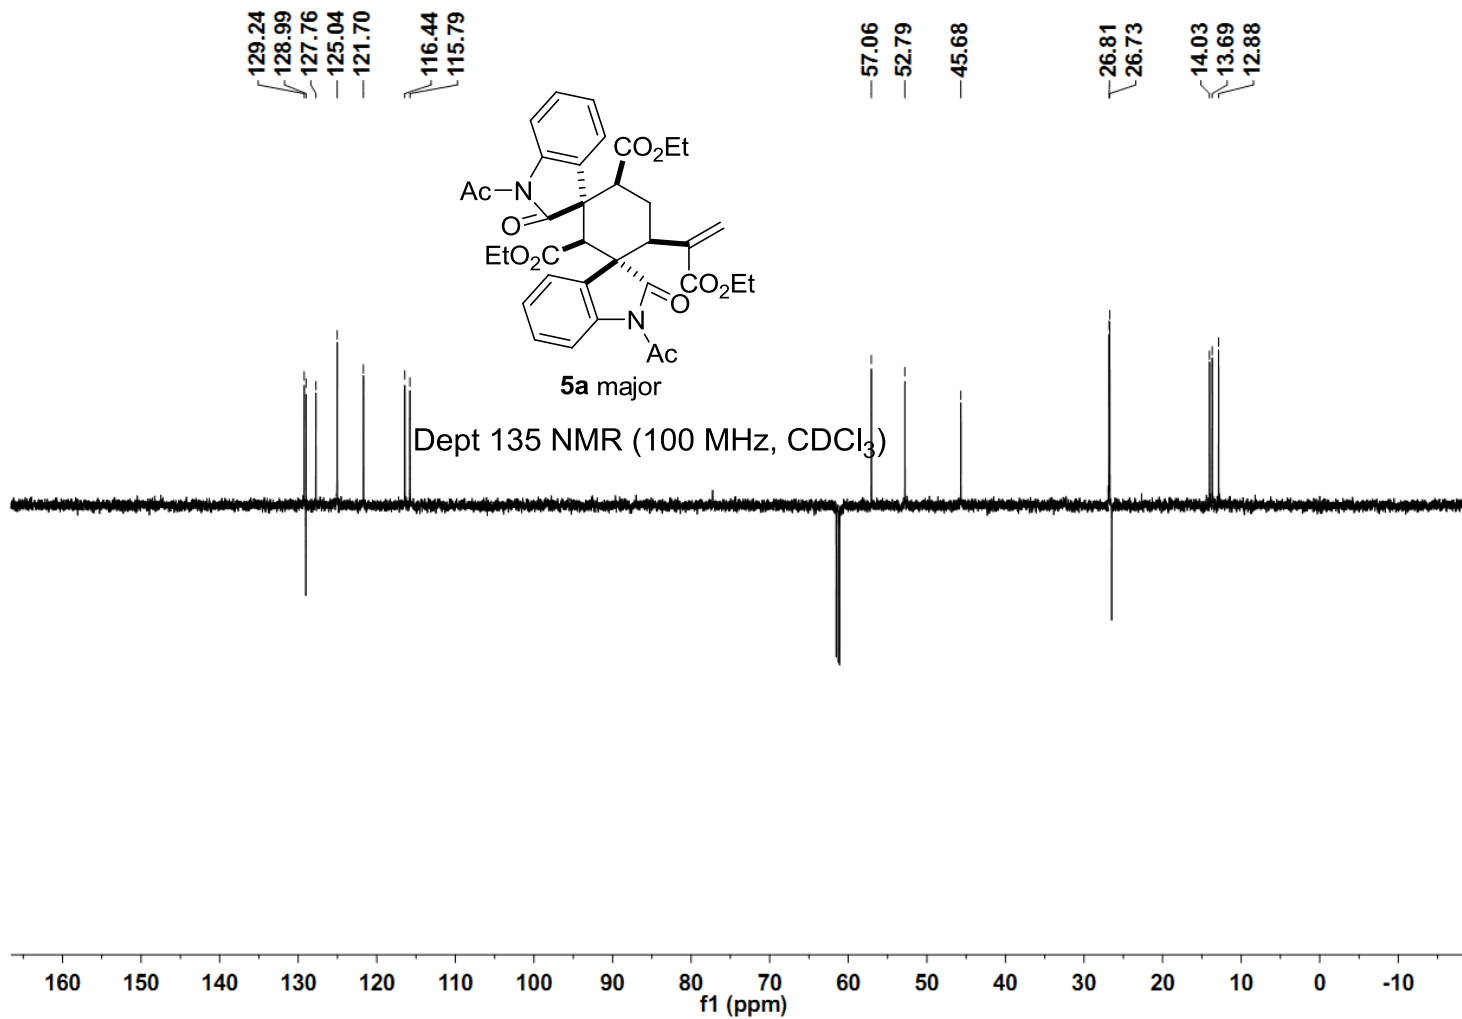

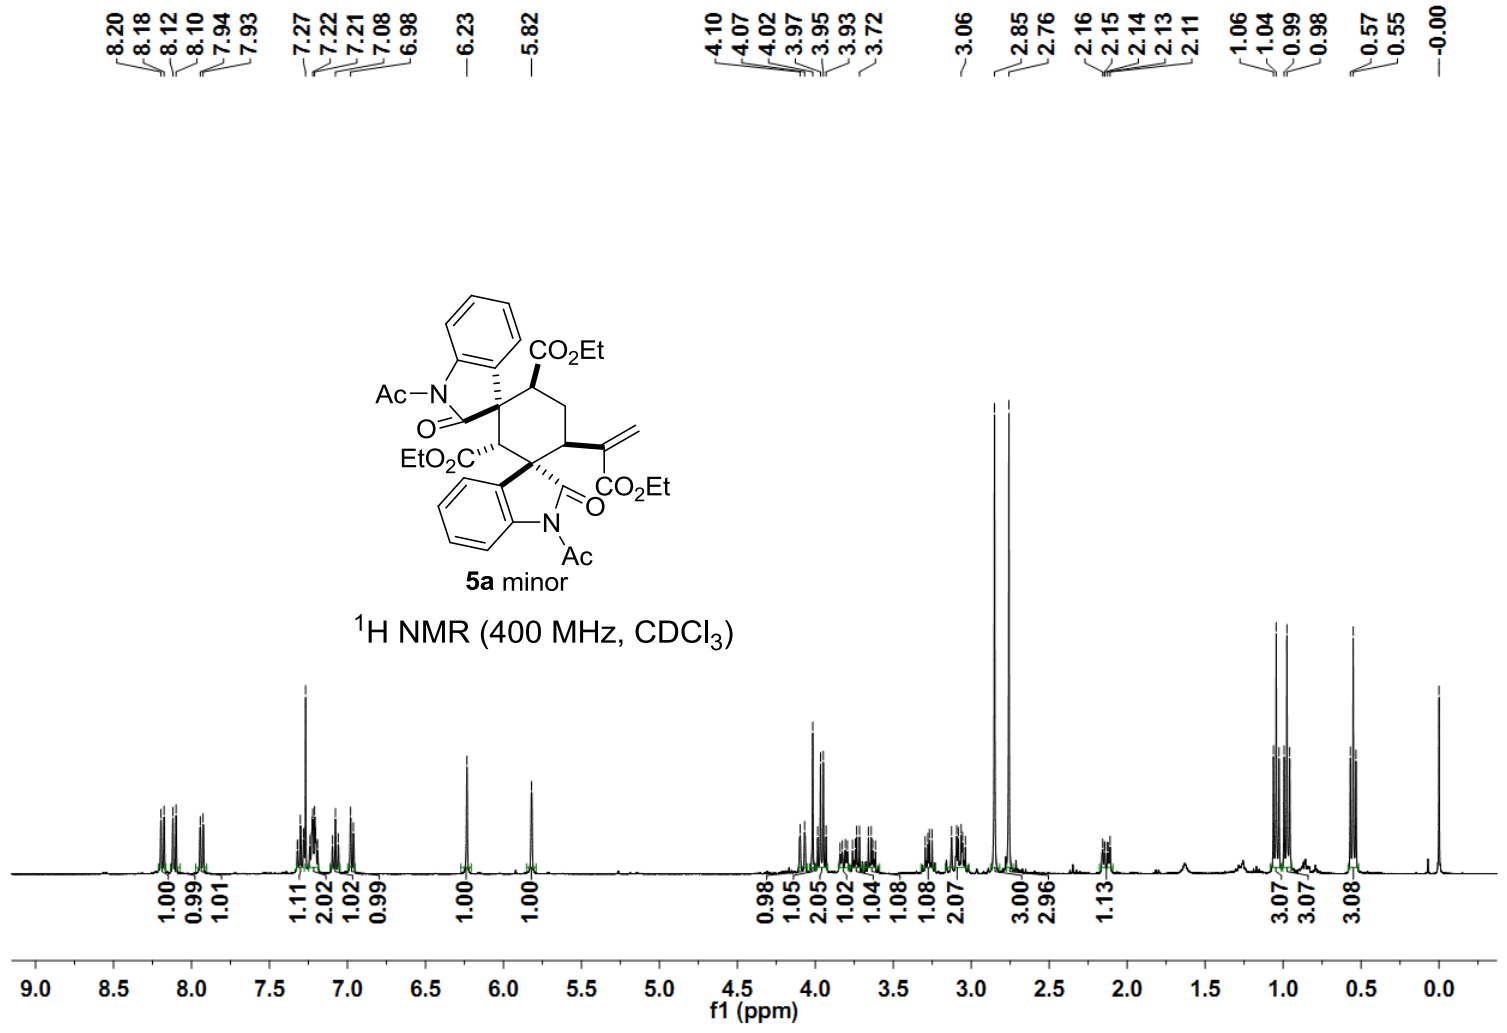



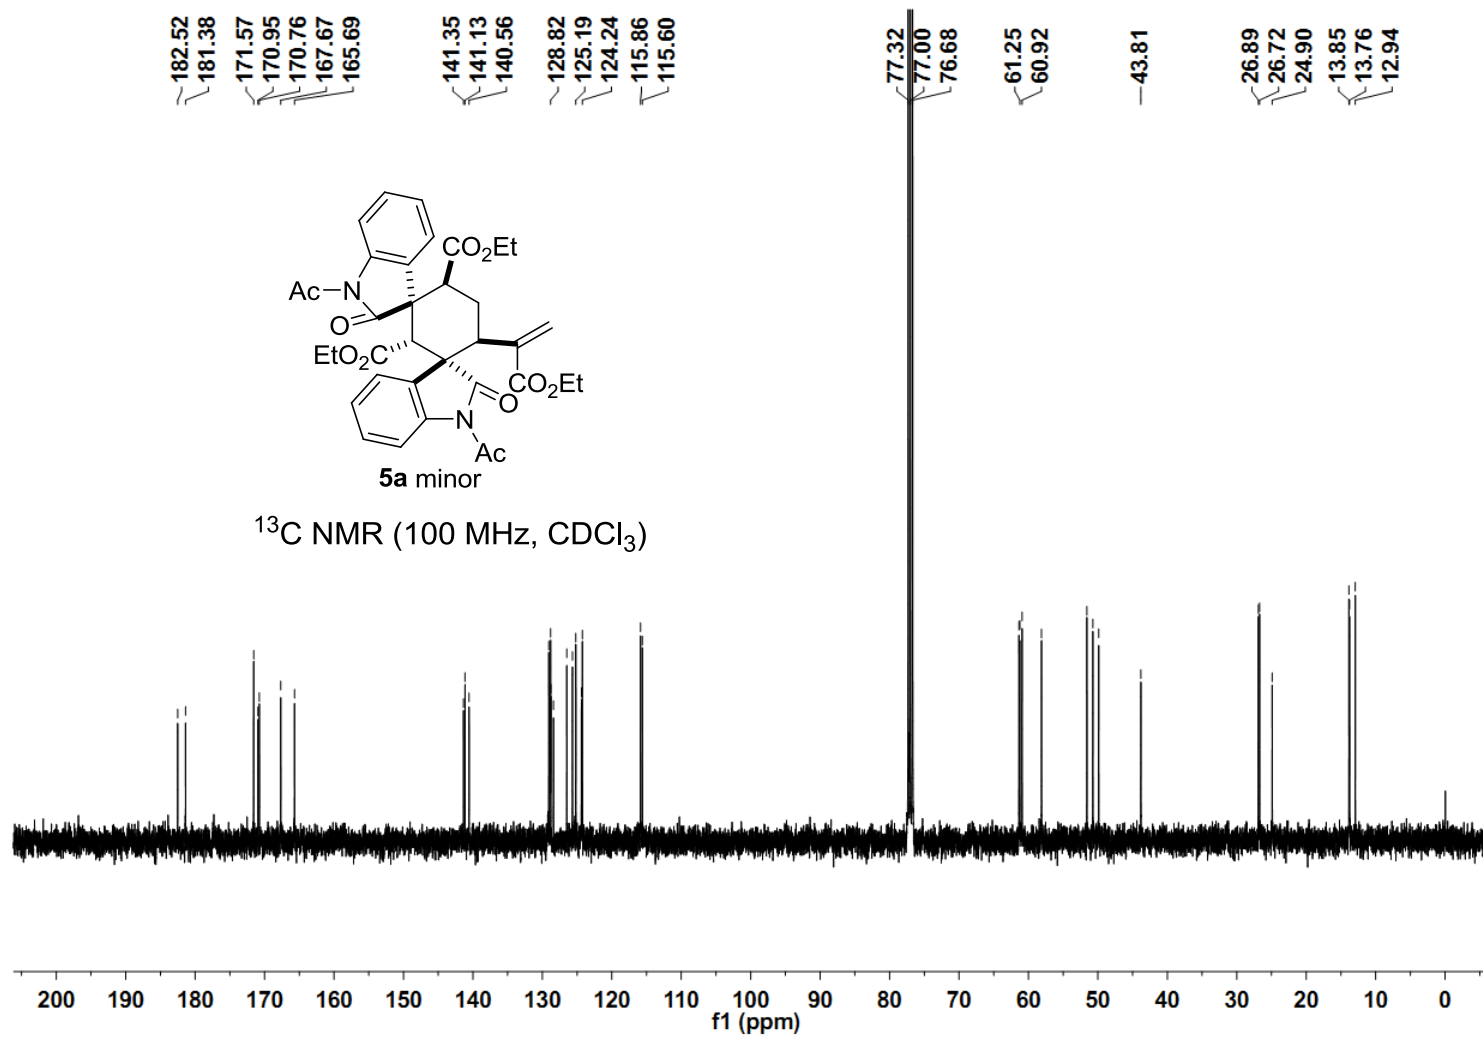

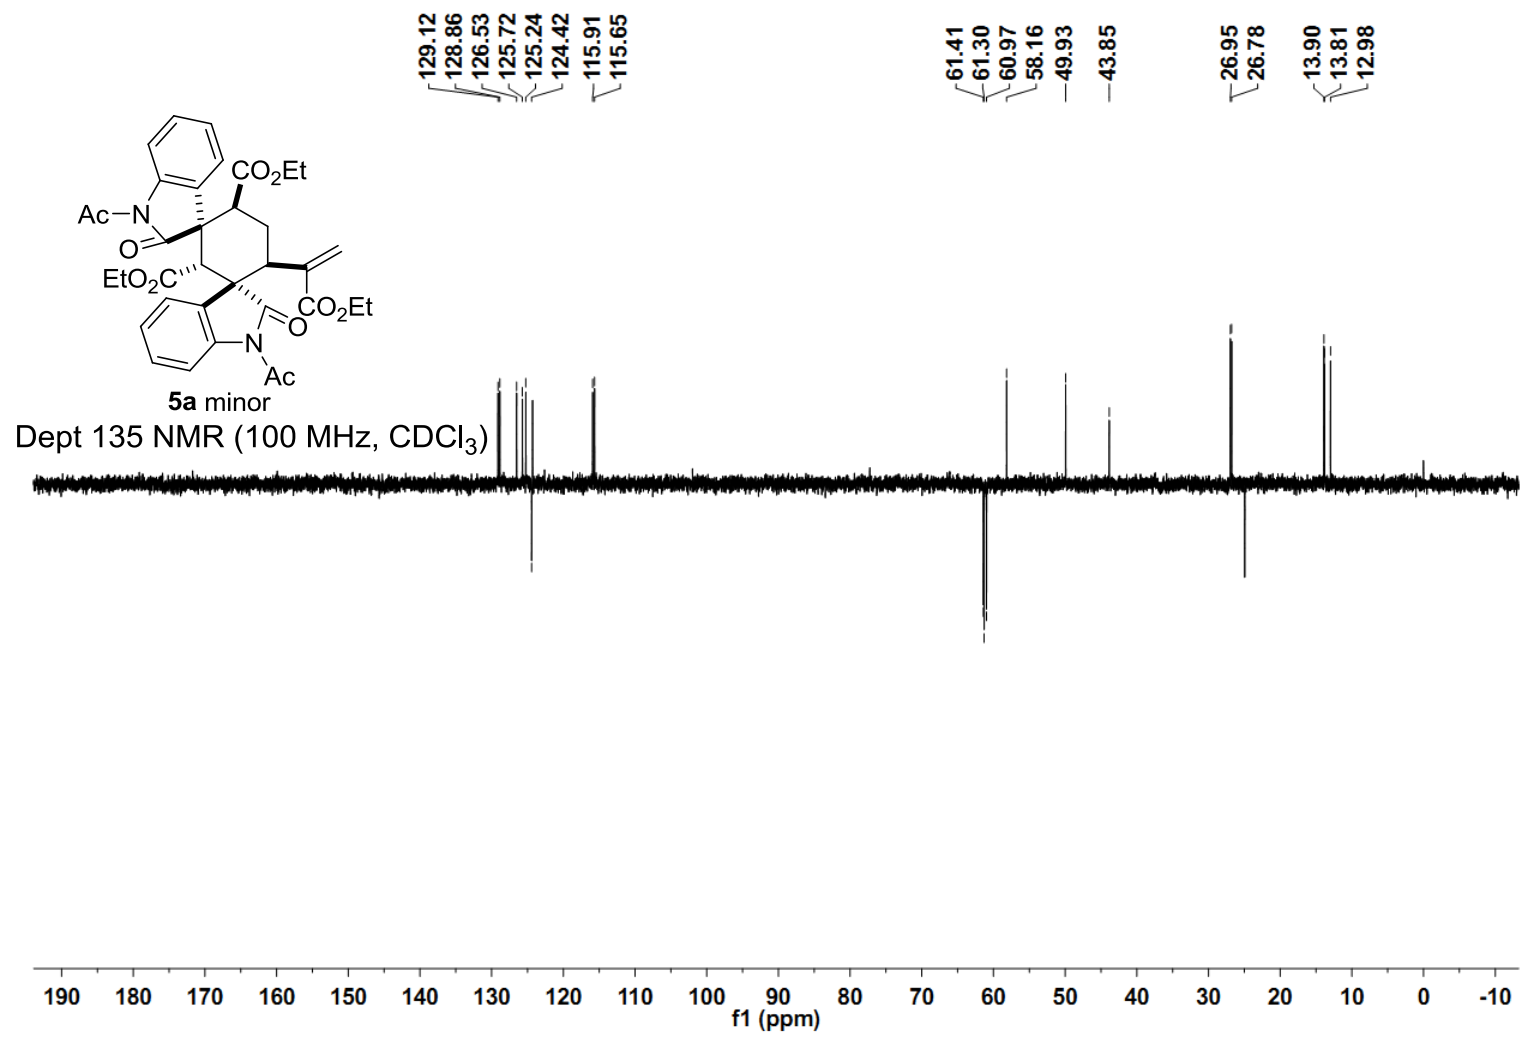

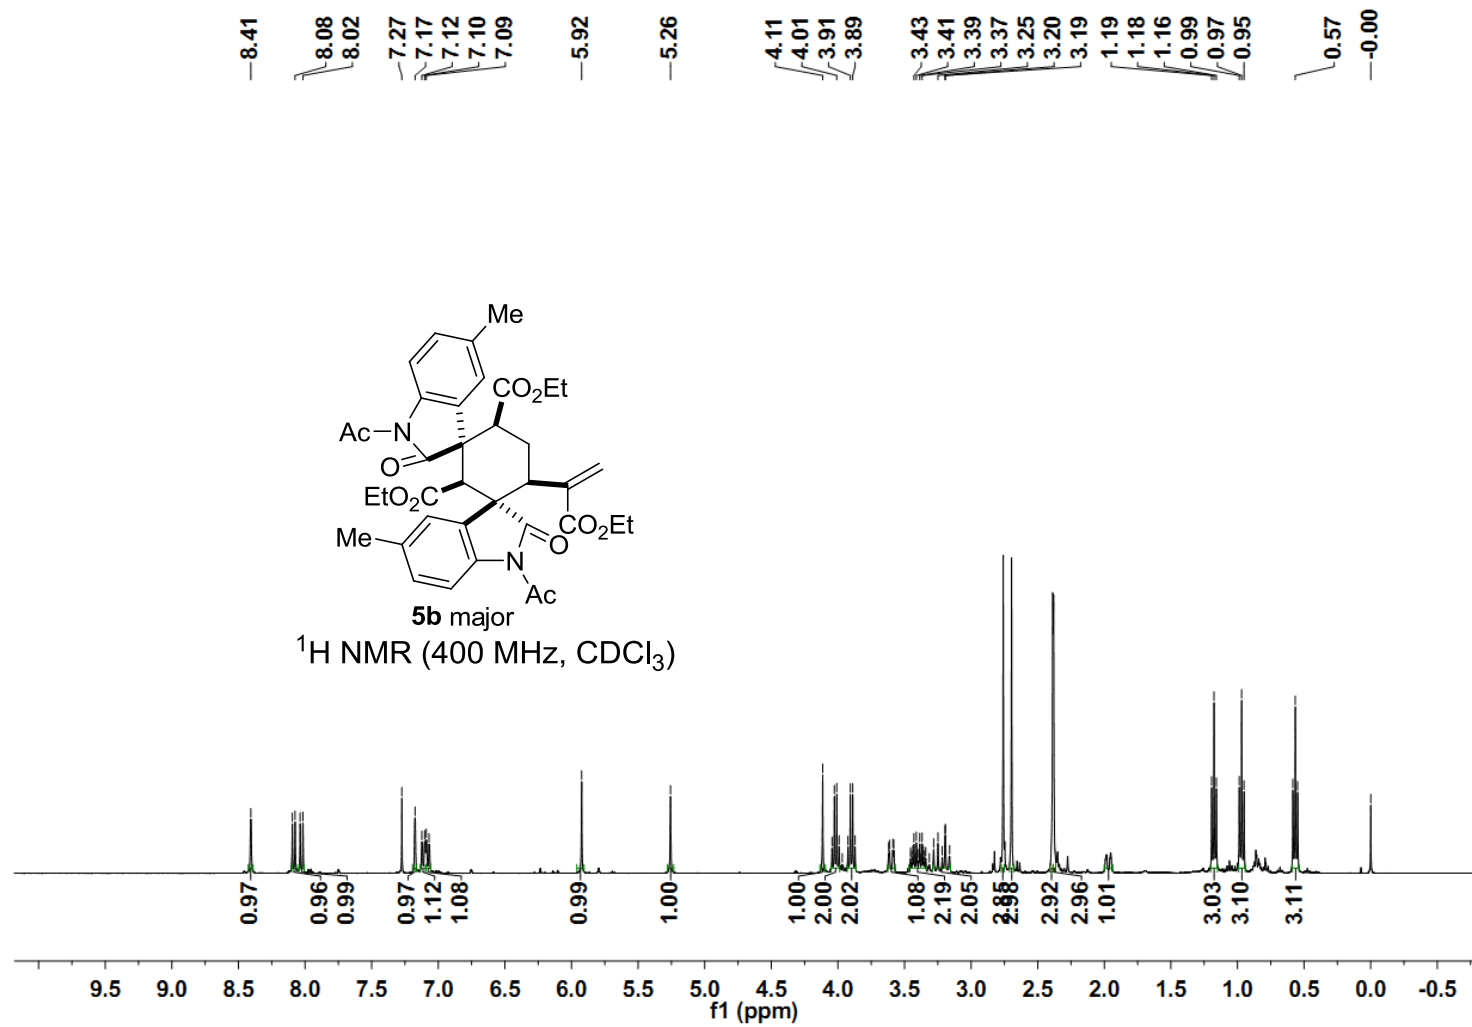

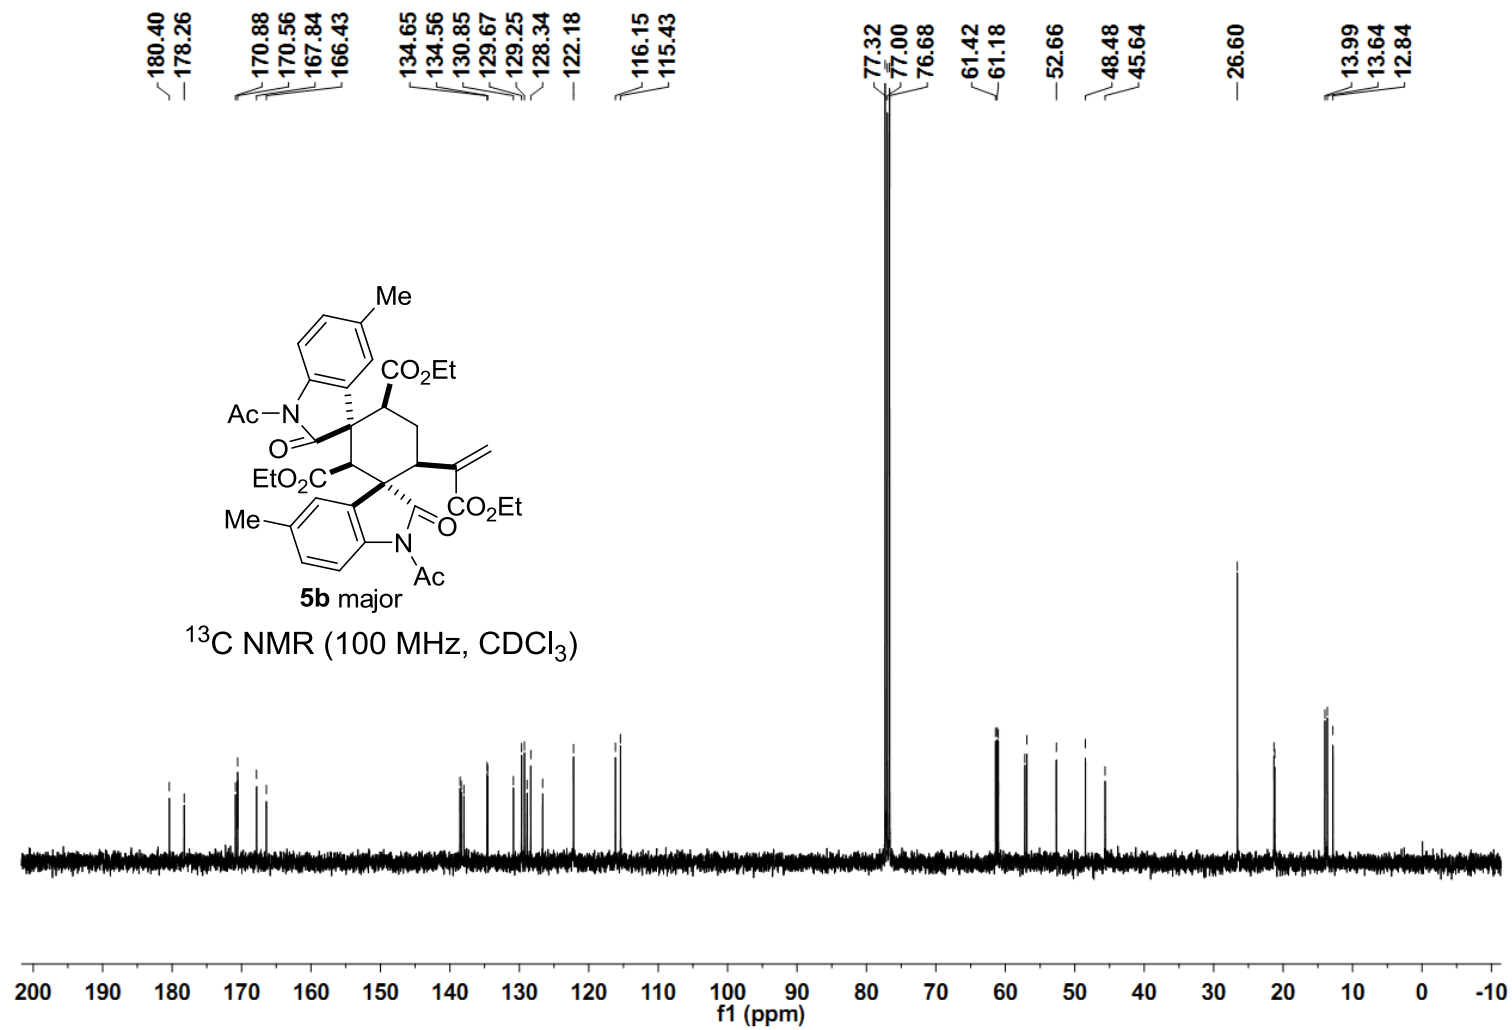

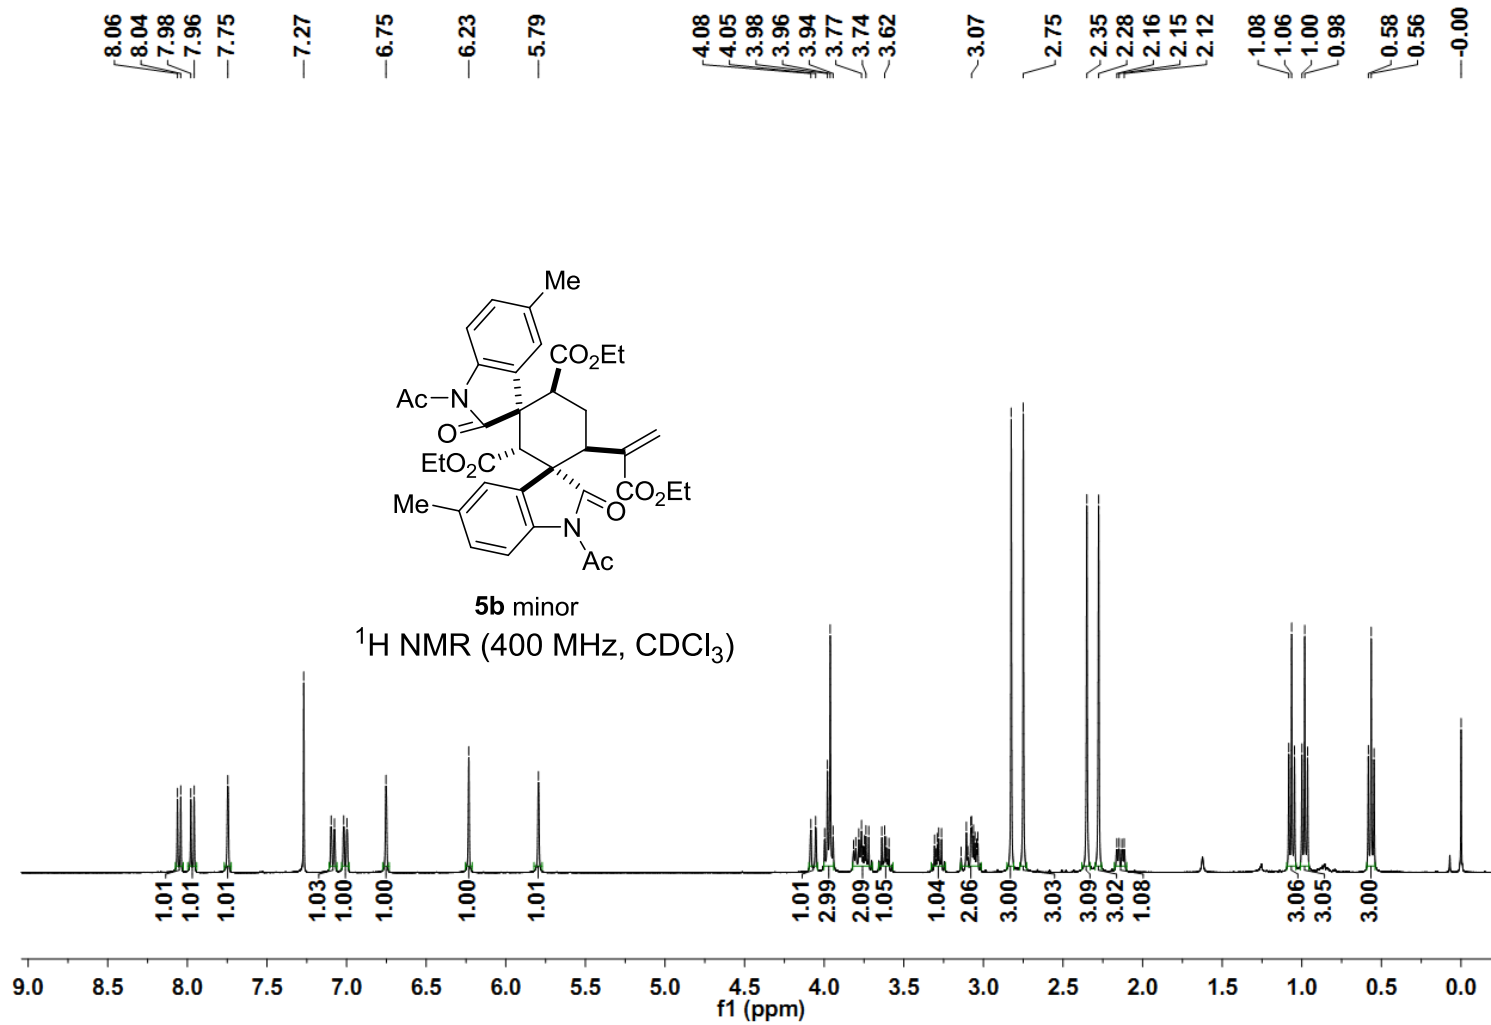

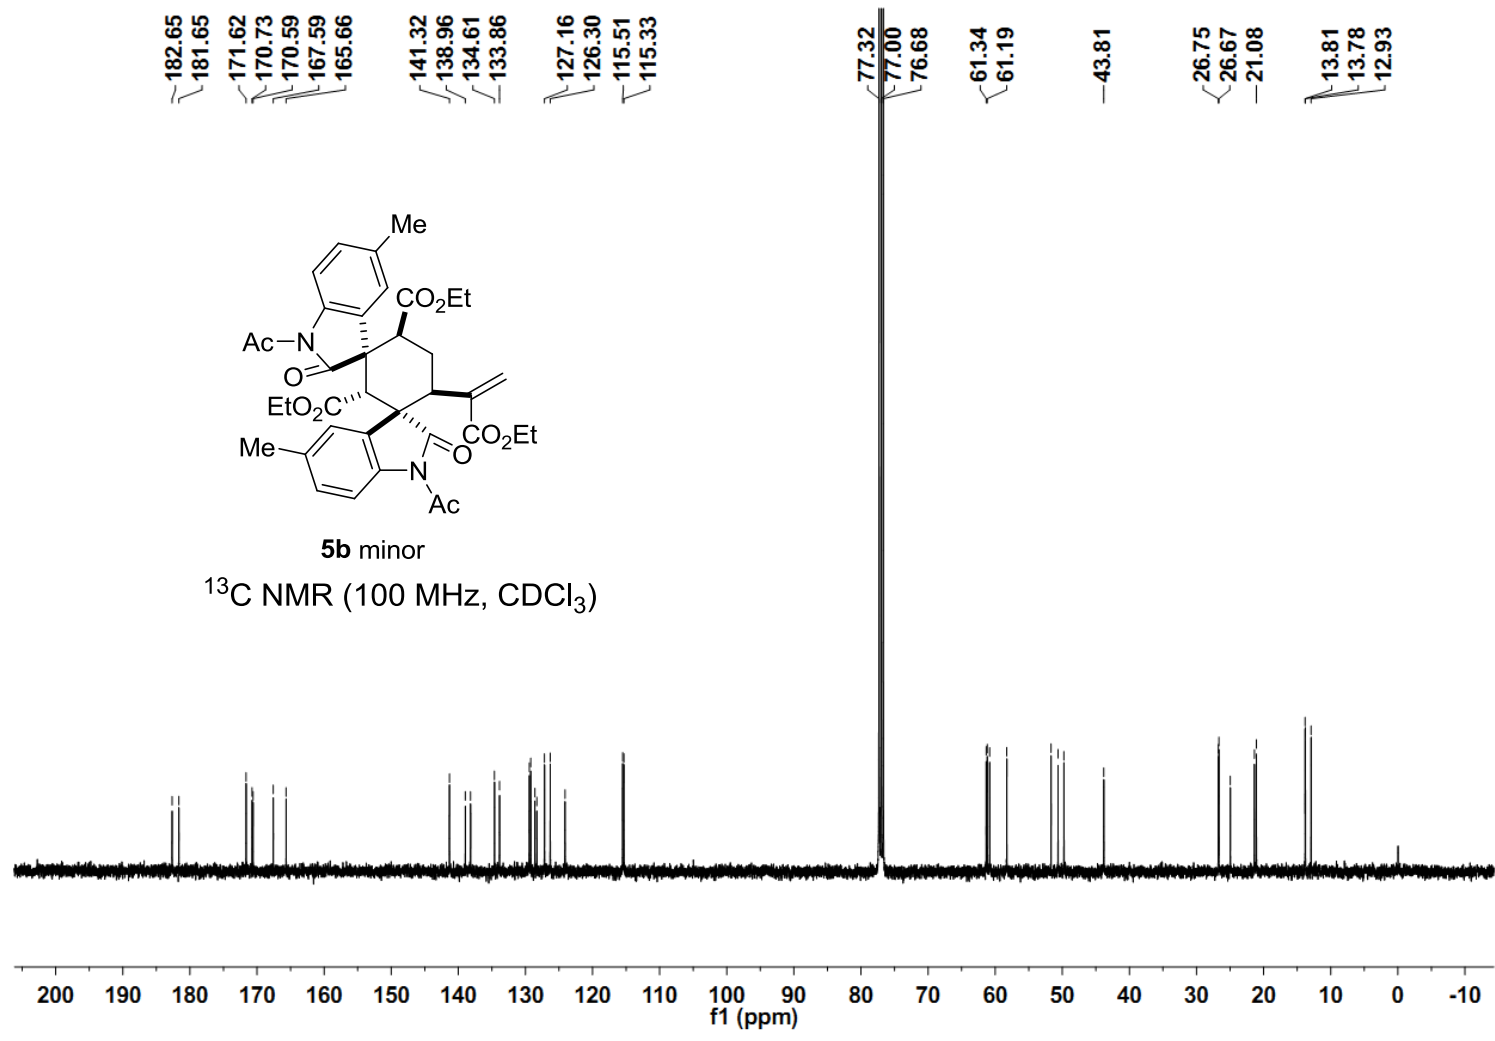

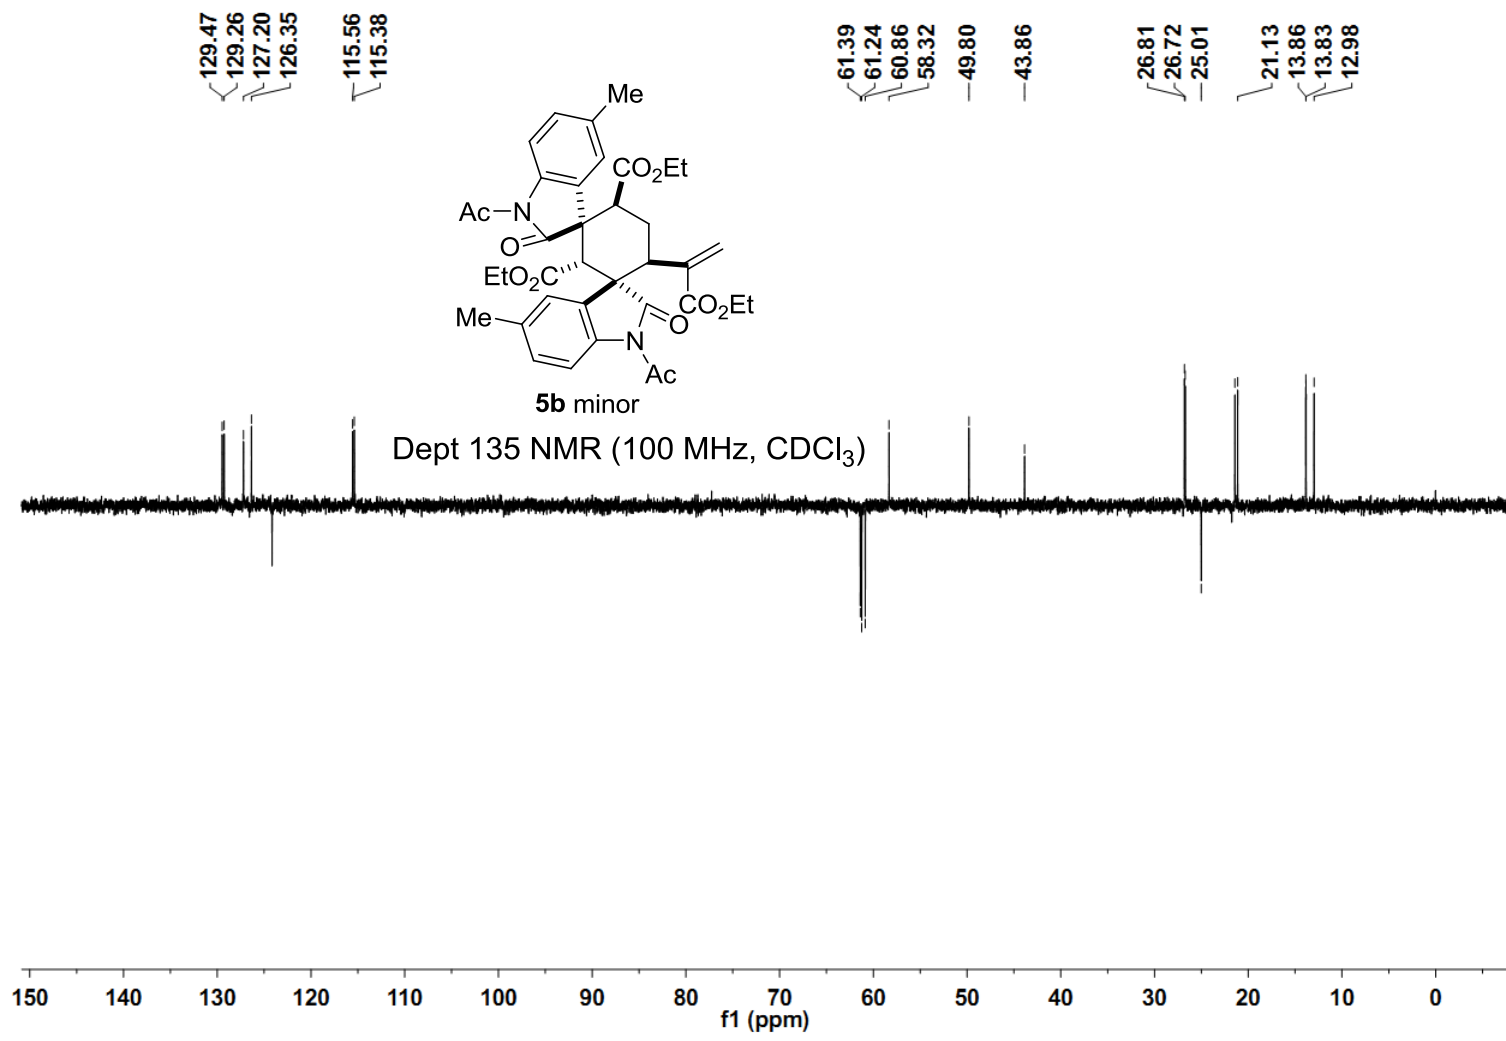

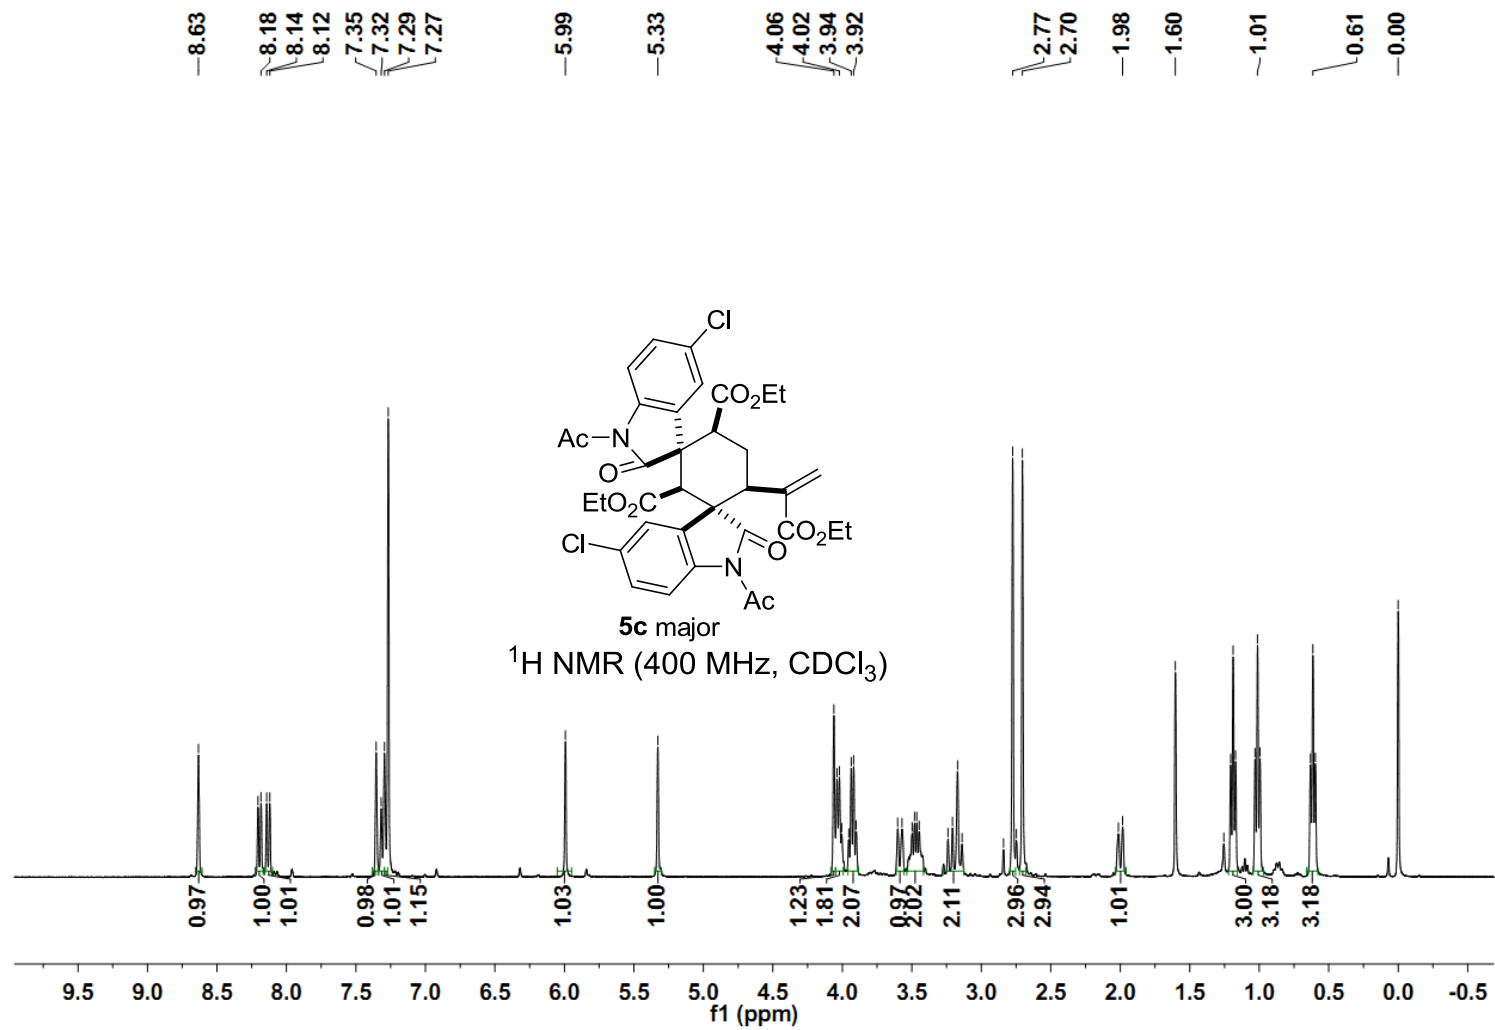



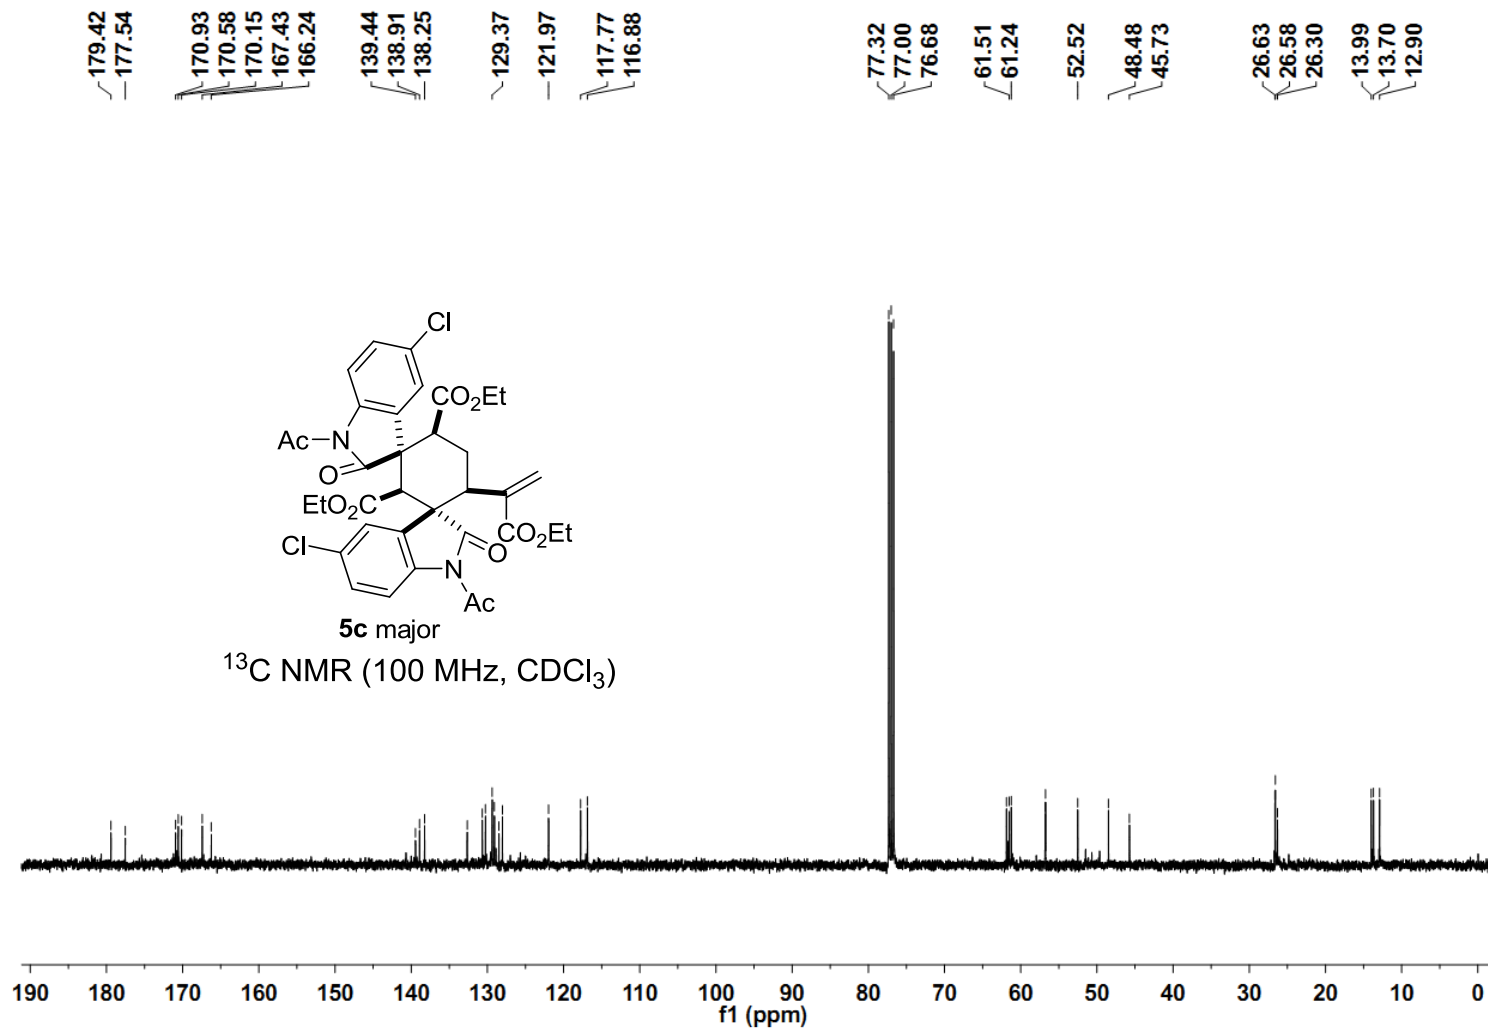

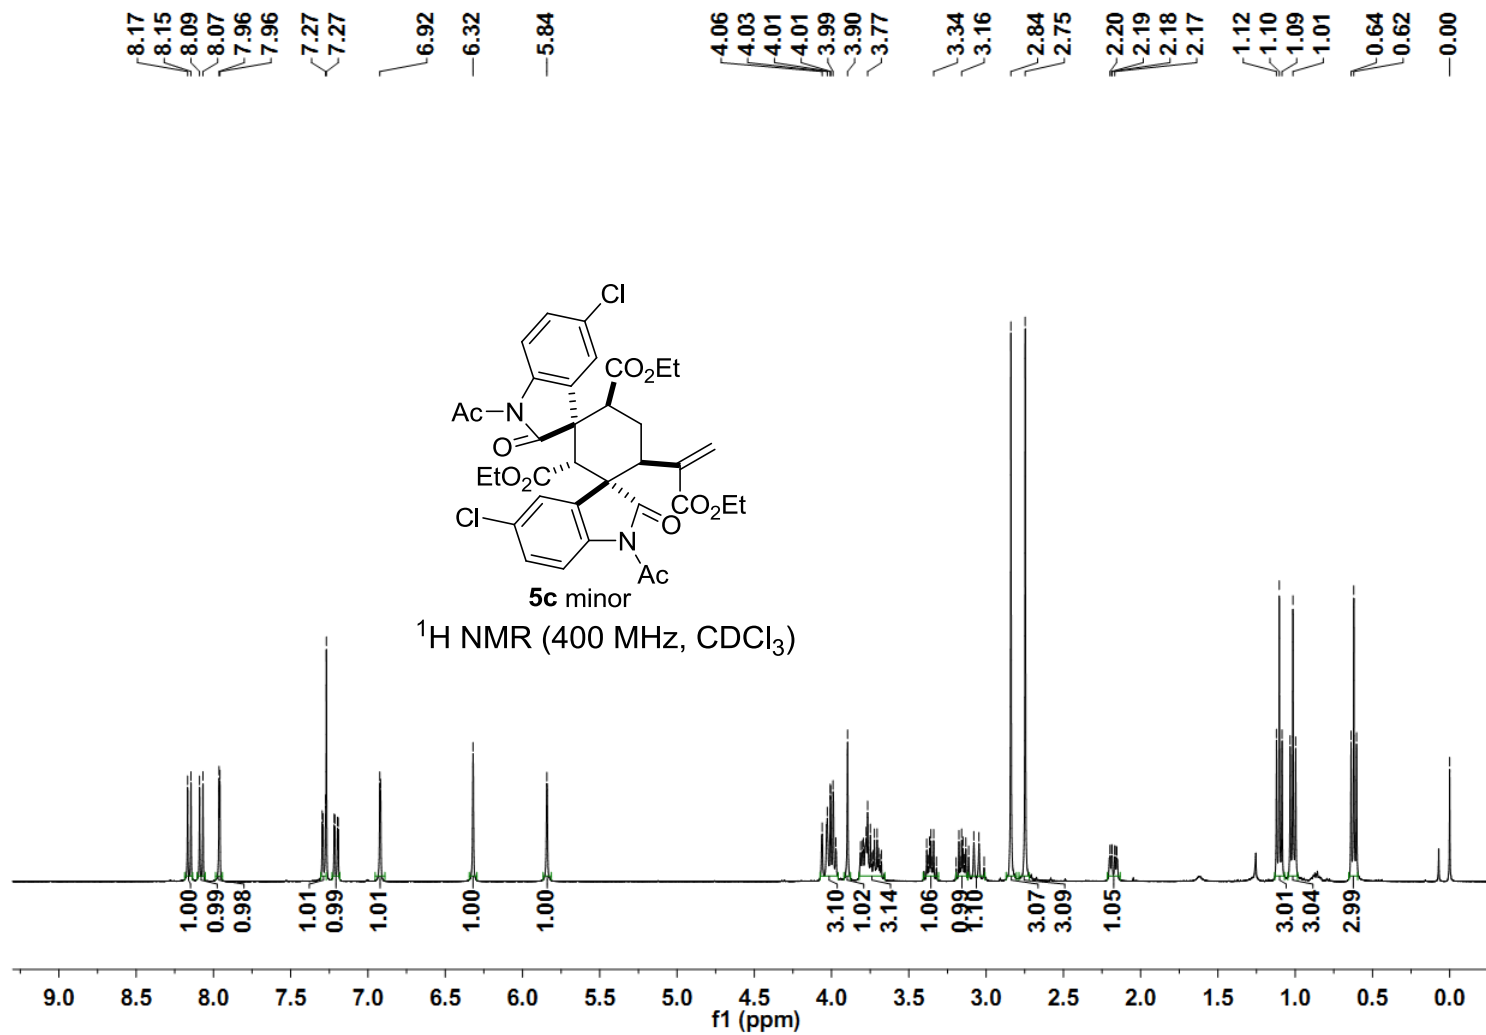

181.90  
180.69  
171.20  
170.77  
170.53  
167.26  
165.71  
140.68  
140.00  
139.26  
128.88  
126.99  
125.67  
117.07  
116.85

77.32  
77.00  
76.68

61.65  
61.09

43.76

26.72  
26.59  
24.82  
13.85  
13.80  
12.96

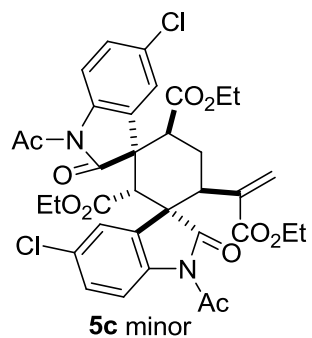

<sup>13</sup>C NMR (100 MHz, CDCl<sub>3</sub>)

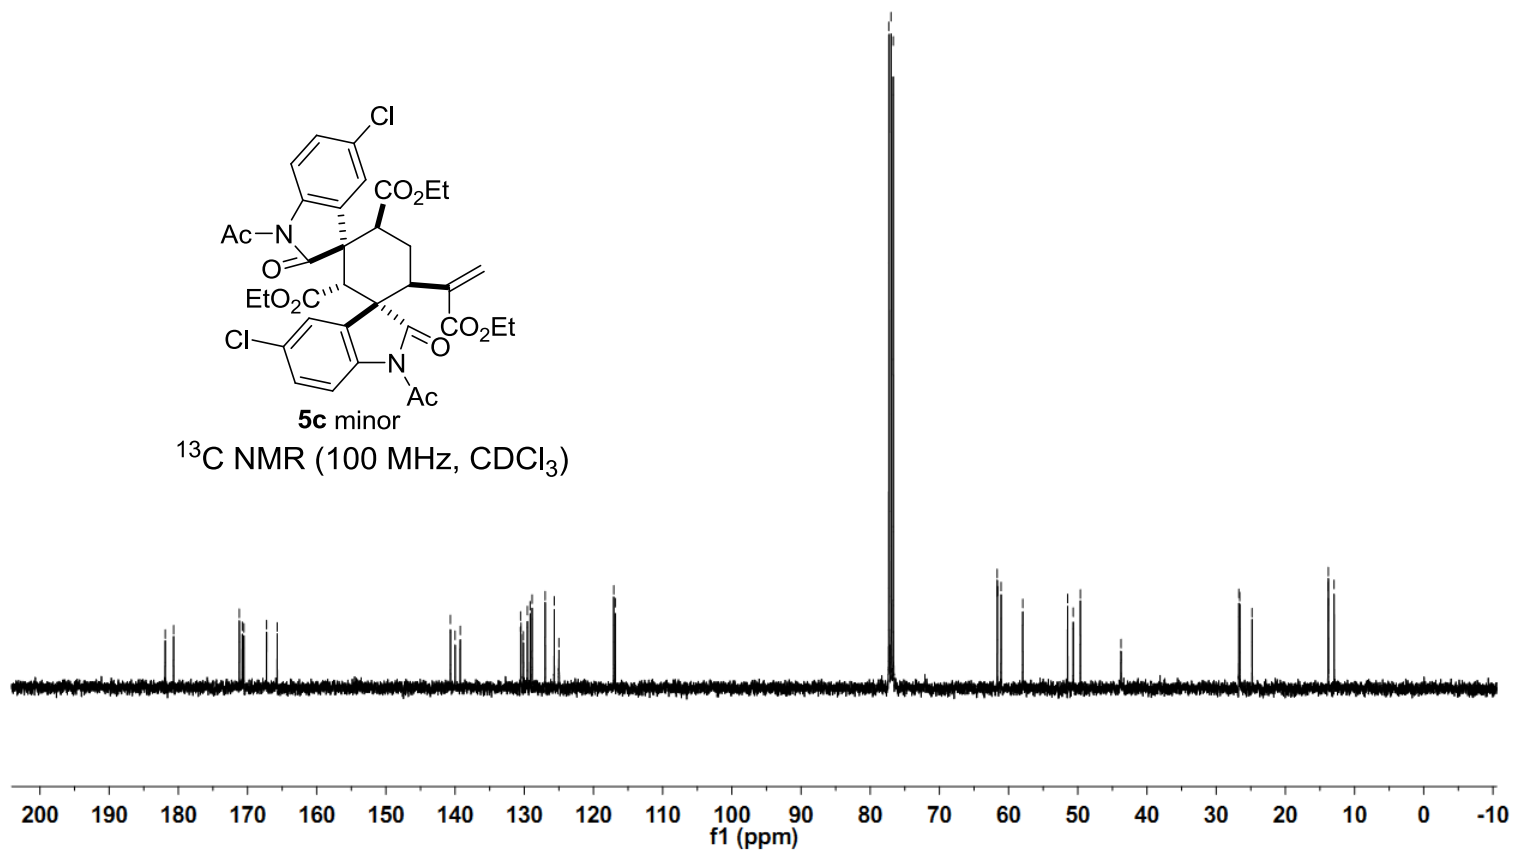

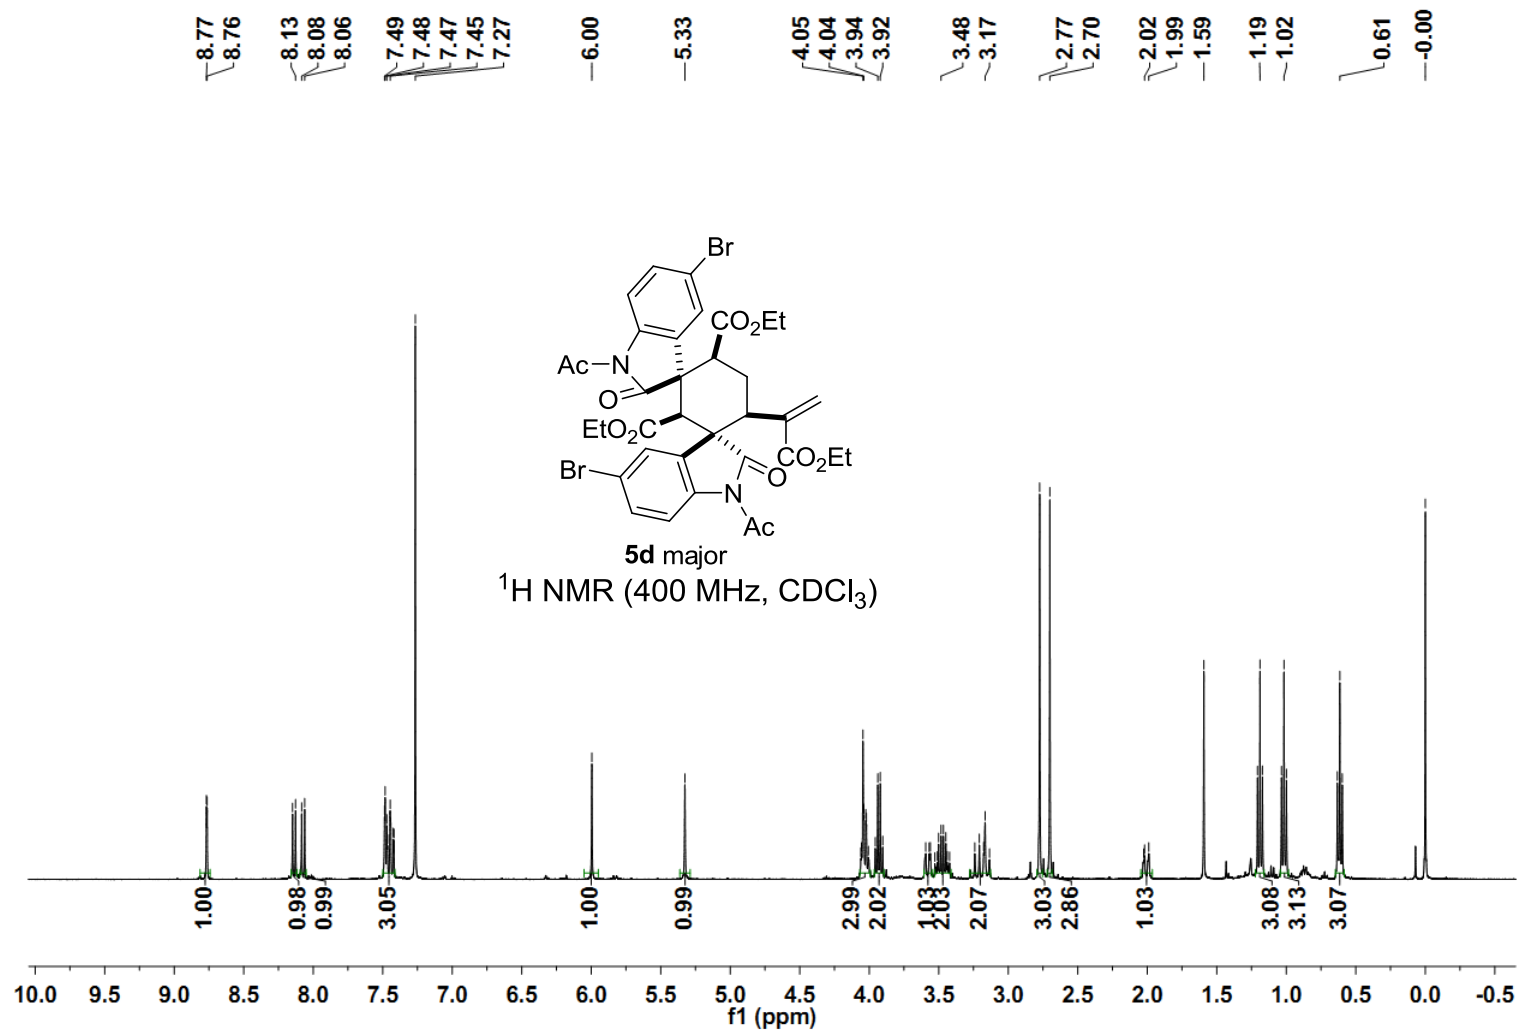

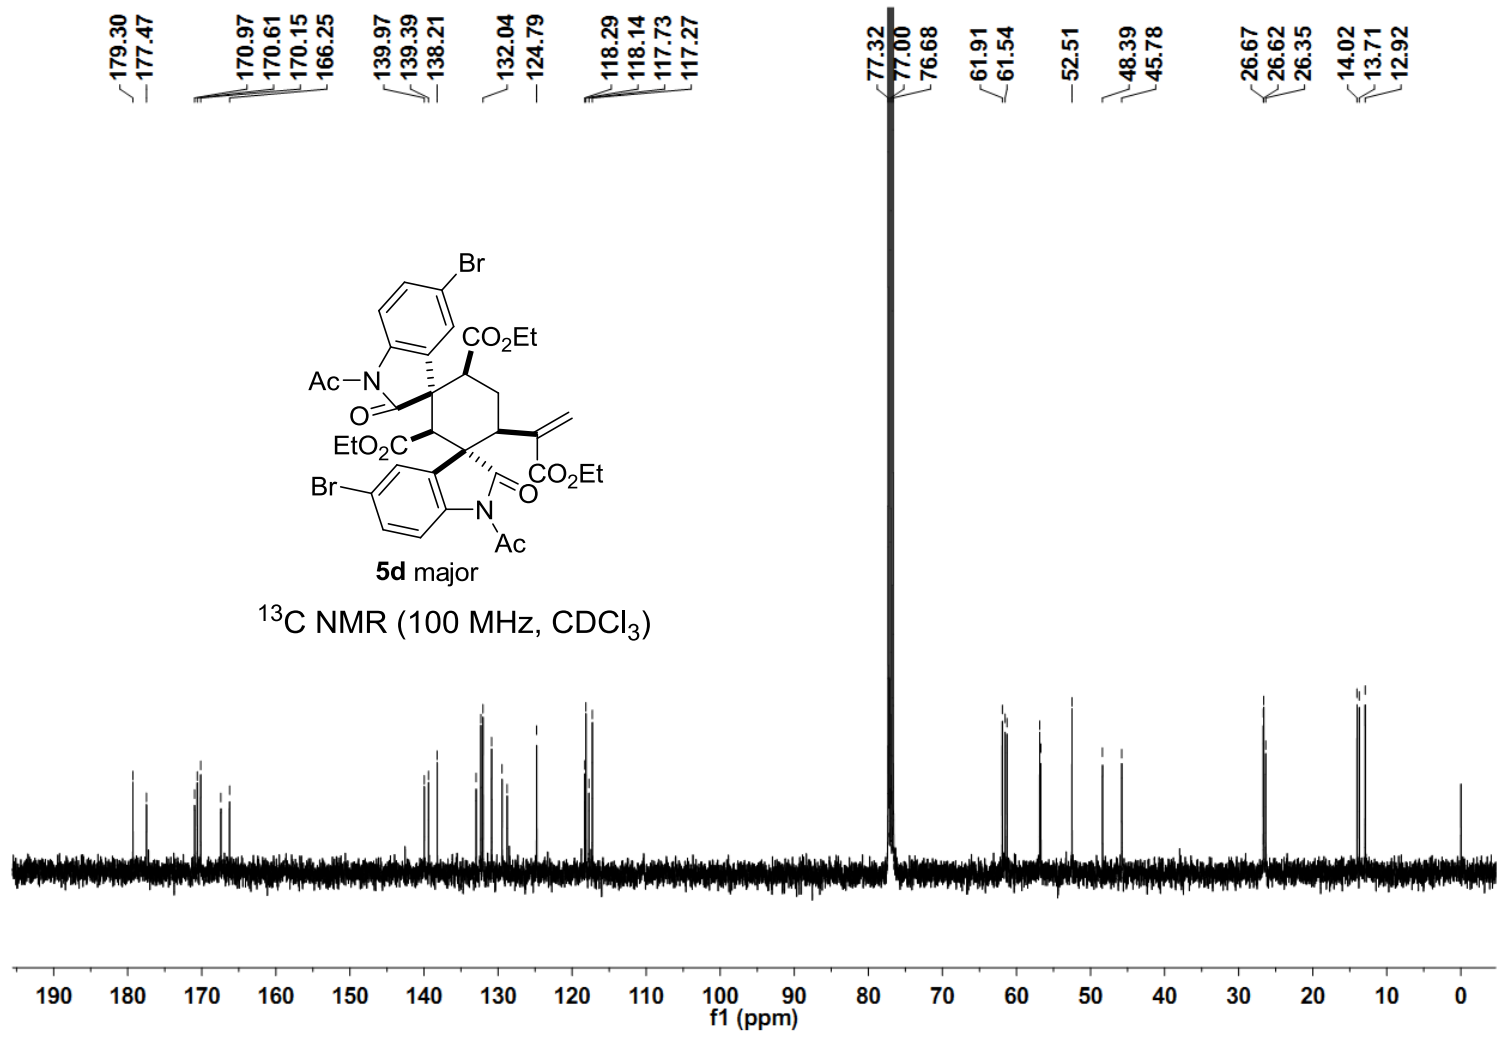

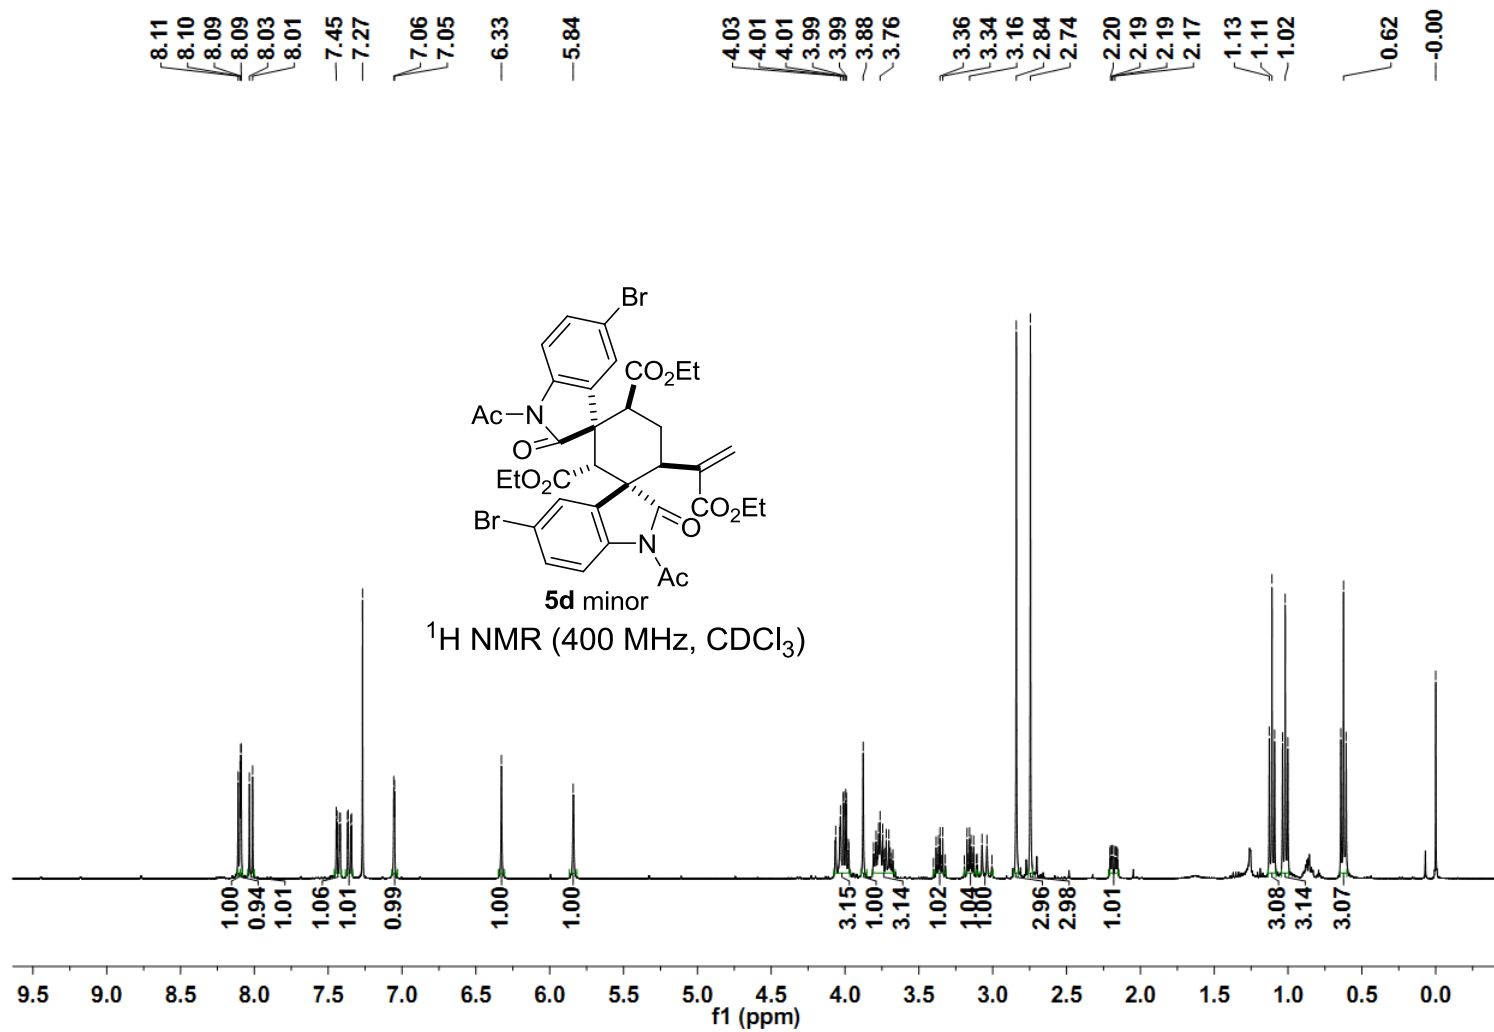

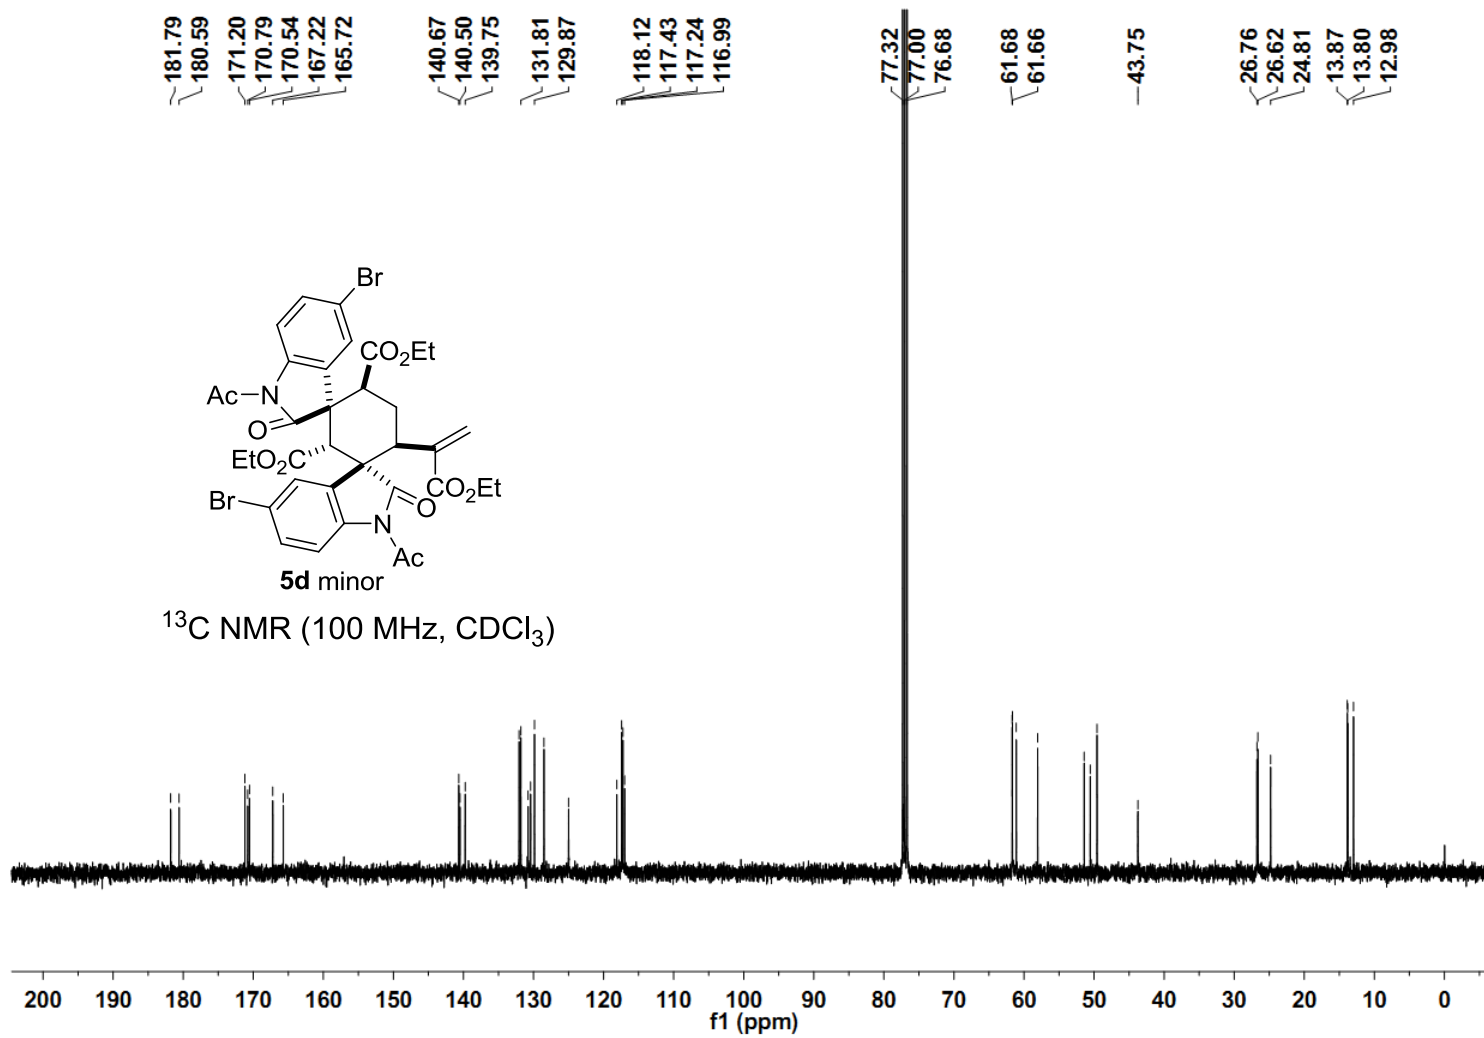

8.44  
8.44  
8.43  
8.41  
8.39  
8.39

7.40  
7.37  
7.37  
7.27  
7.25  
7.23

5.97

5.28

4.05  
4.01  
3.93  
3.91

3.15  
2.75  
2.70

1.99  
1.98  
1.96

1.20  
1.18  
1.01

0.63  
-0.00

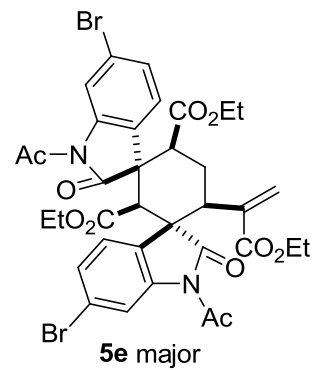

<sup>1</sup>H NMR (400 MHz, CDCl<sub>3</sub>)

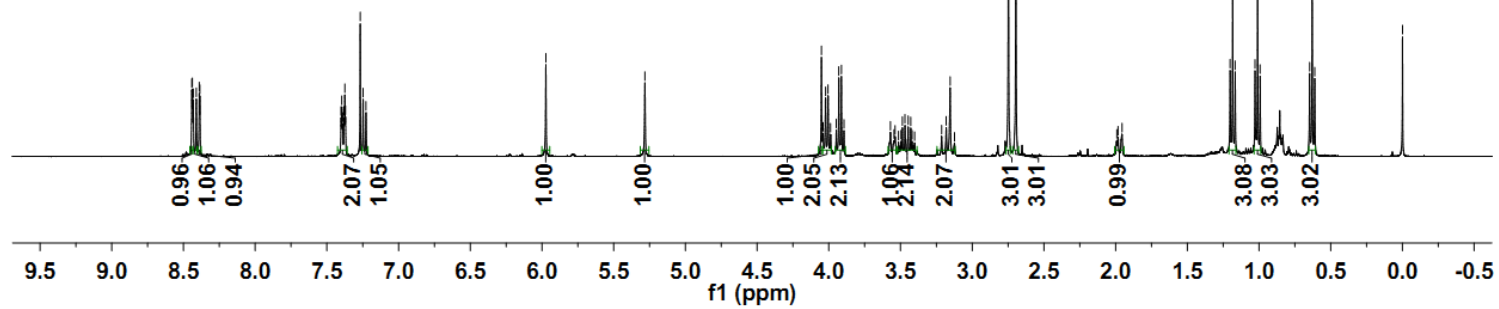



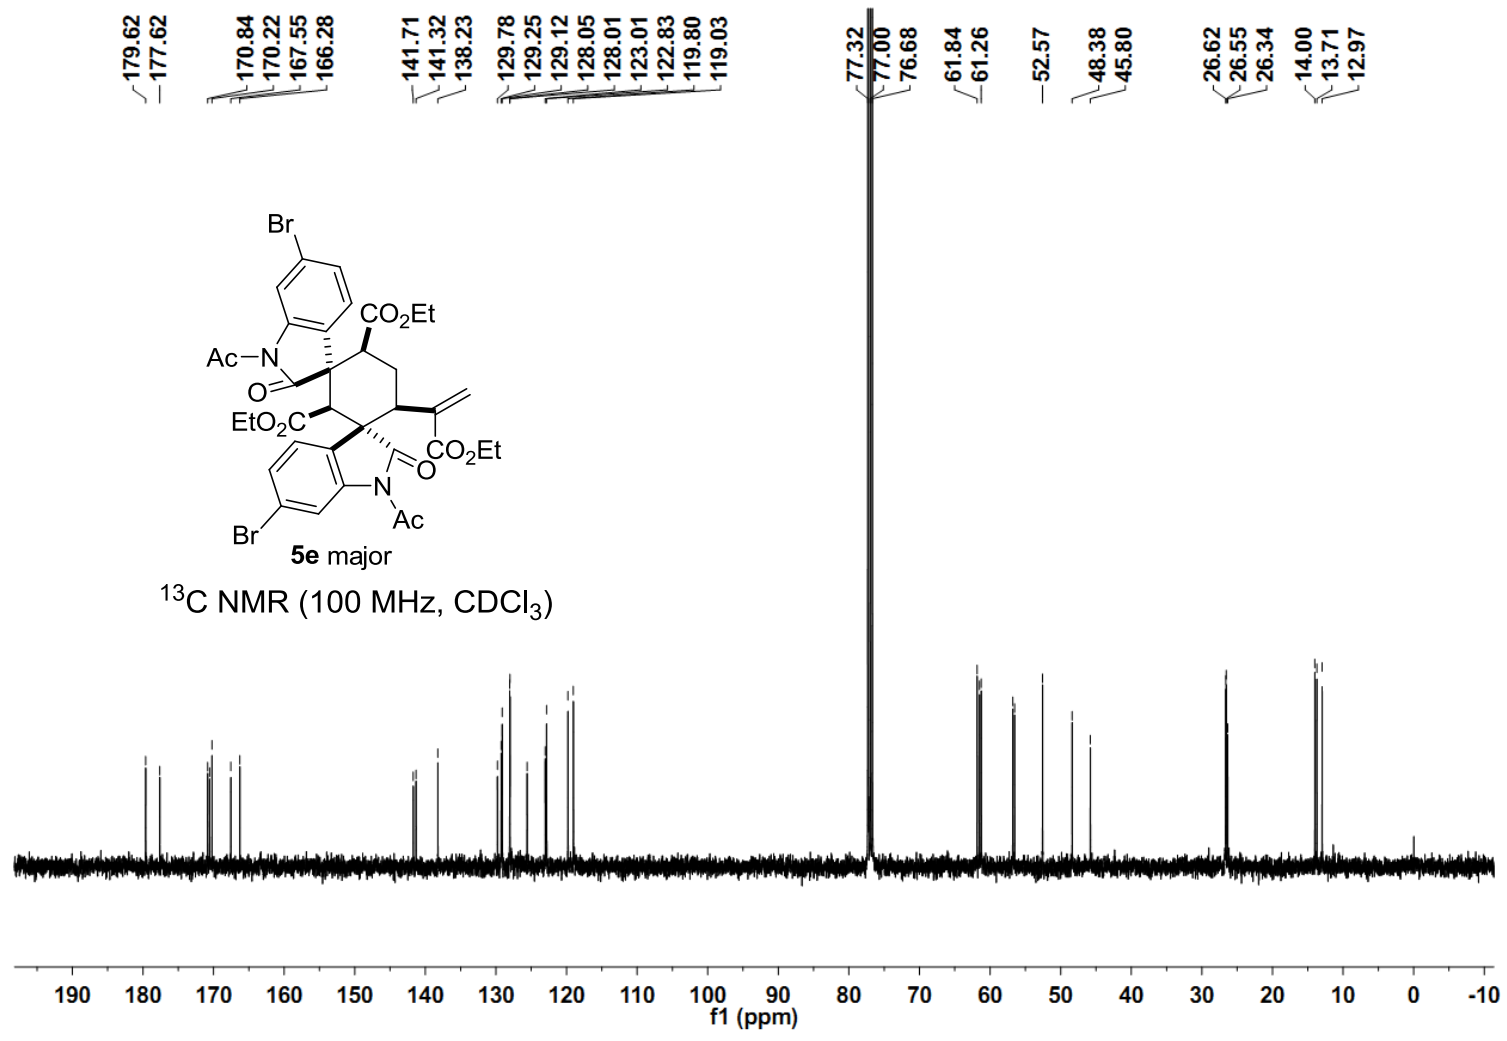

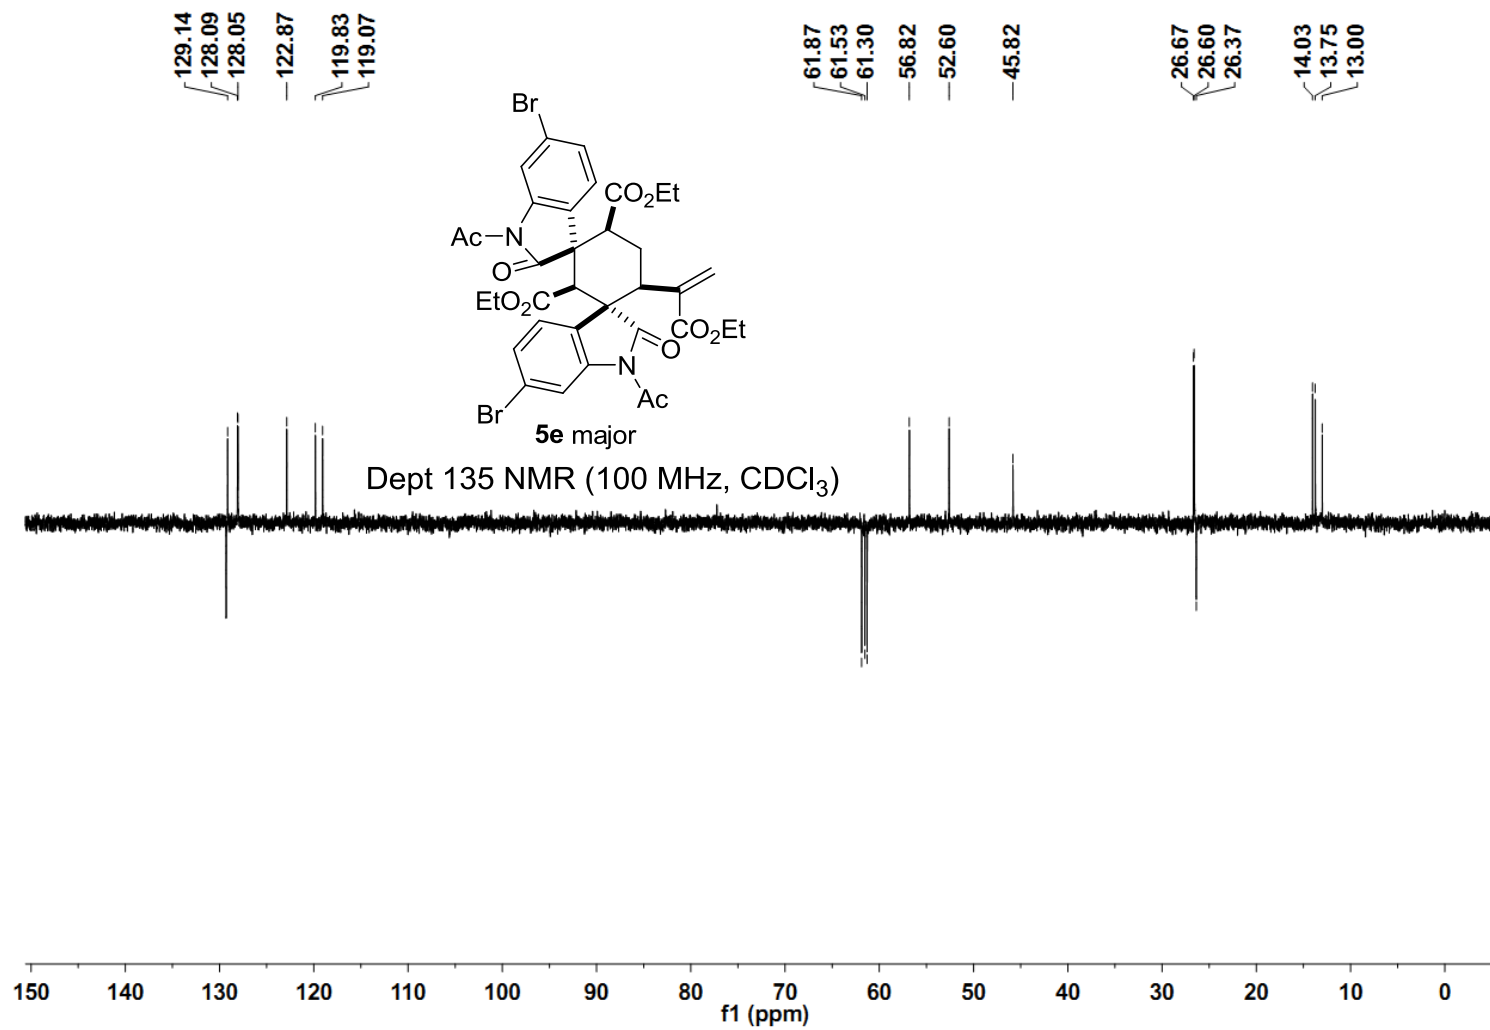

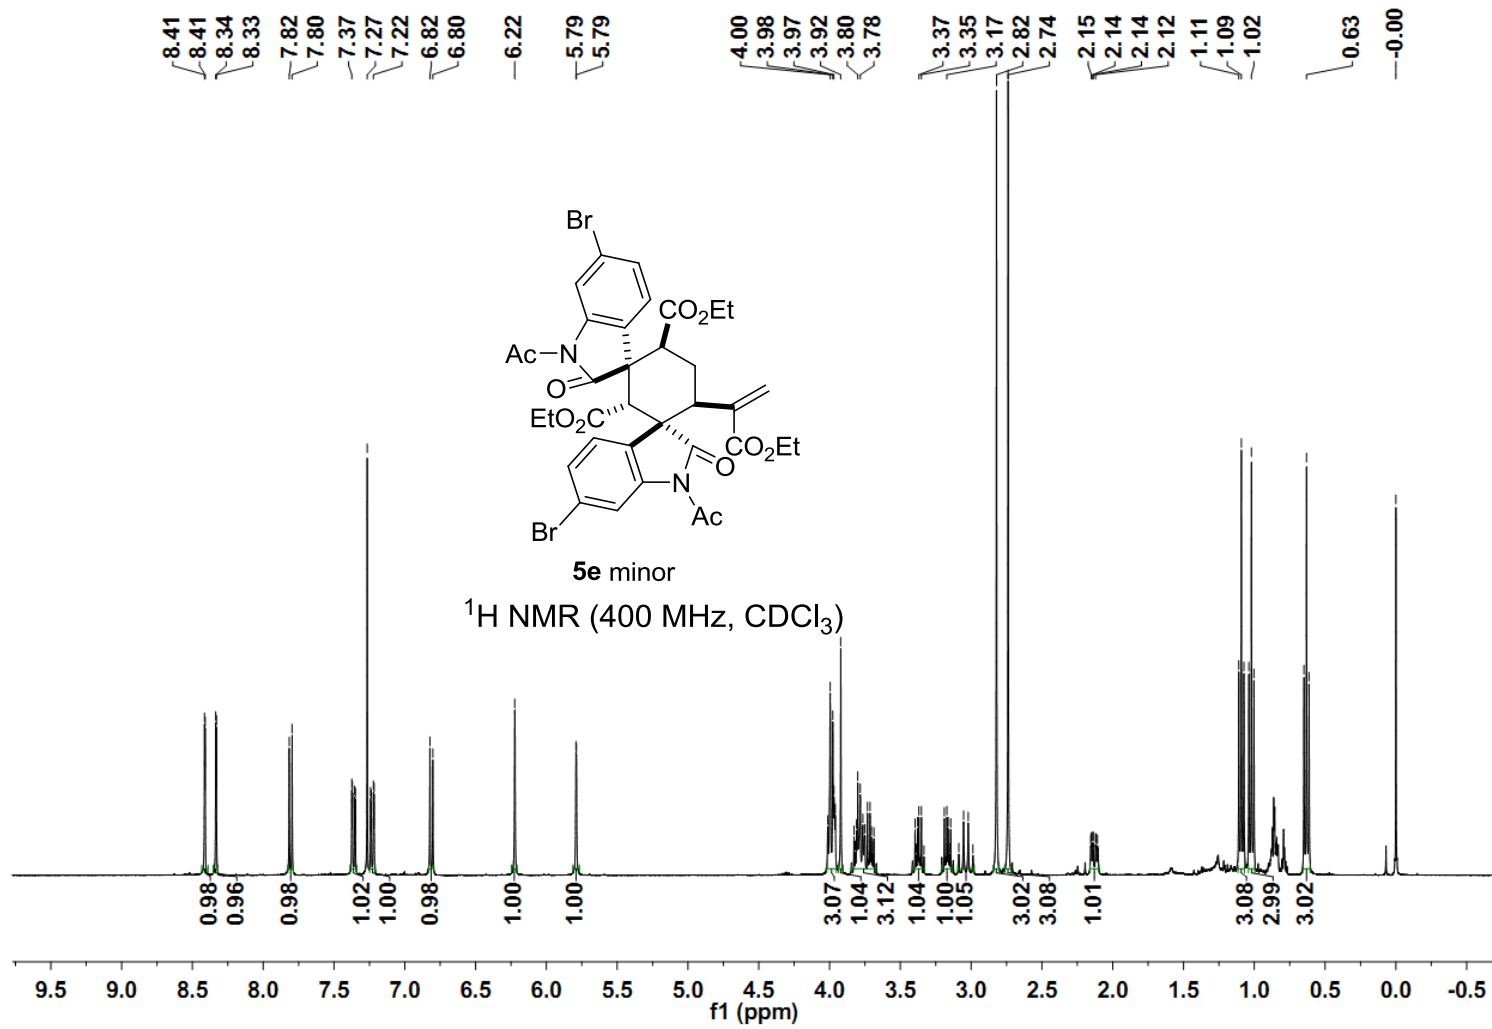

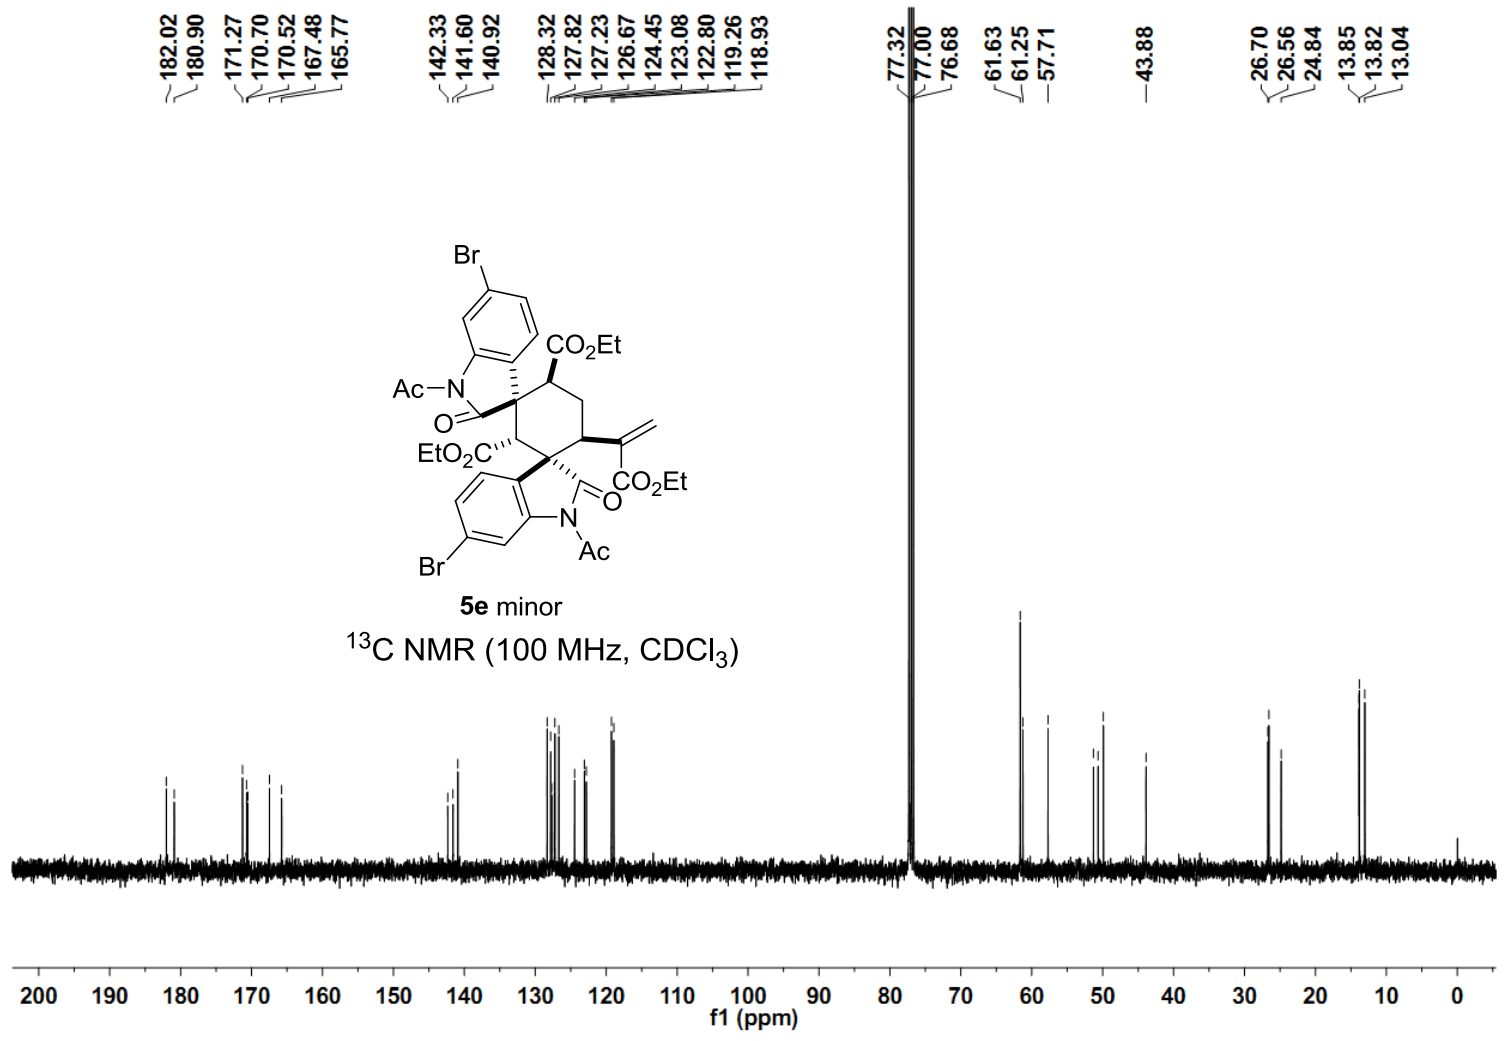

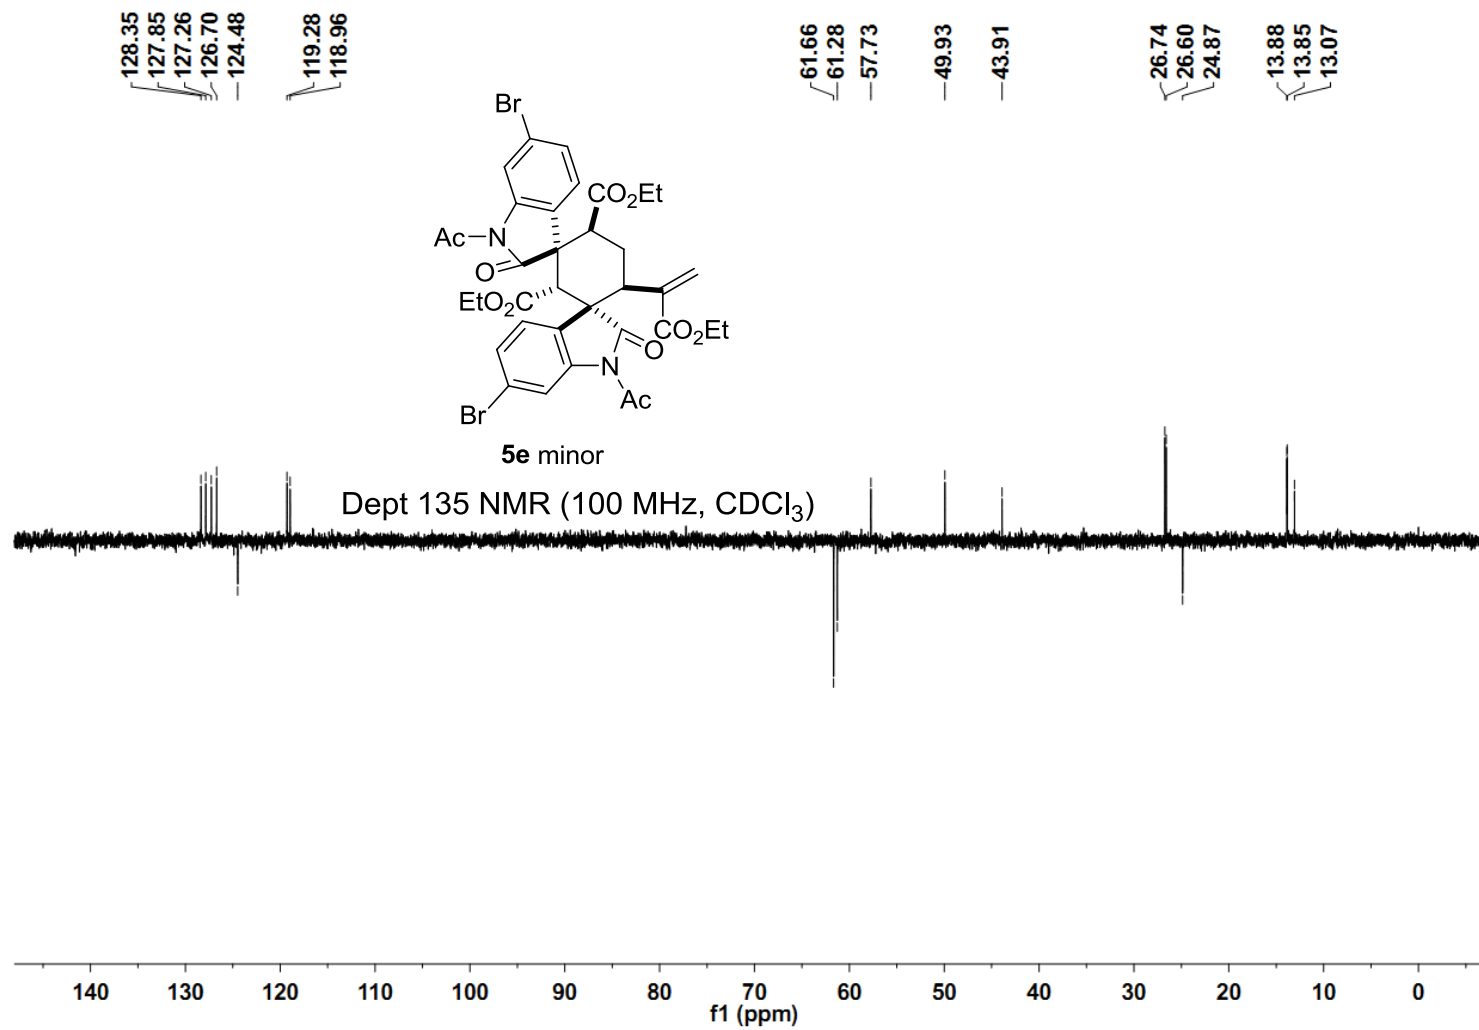

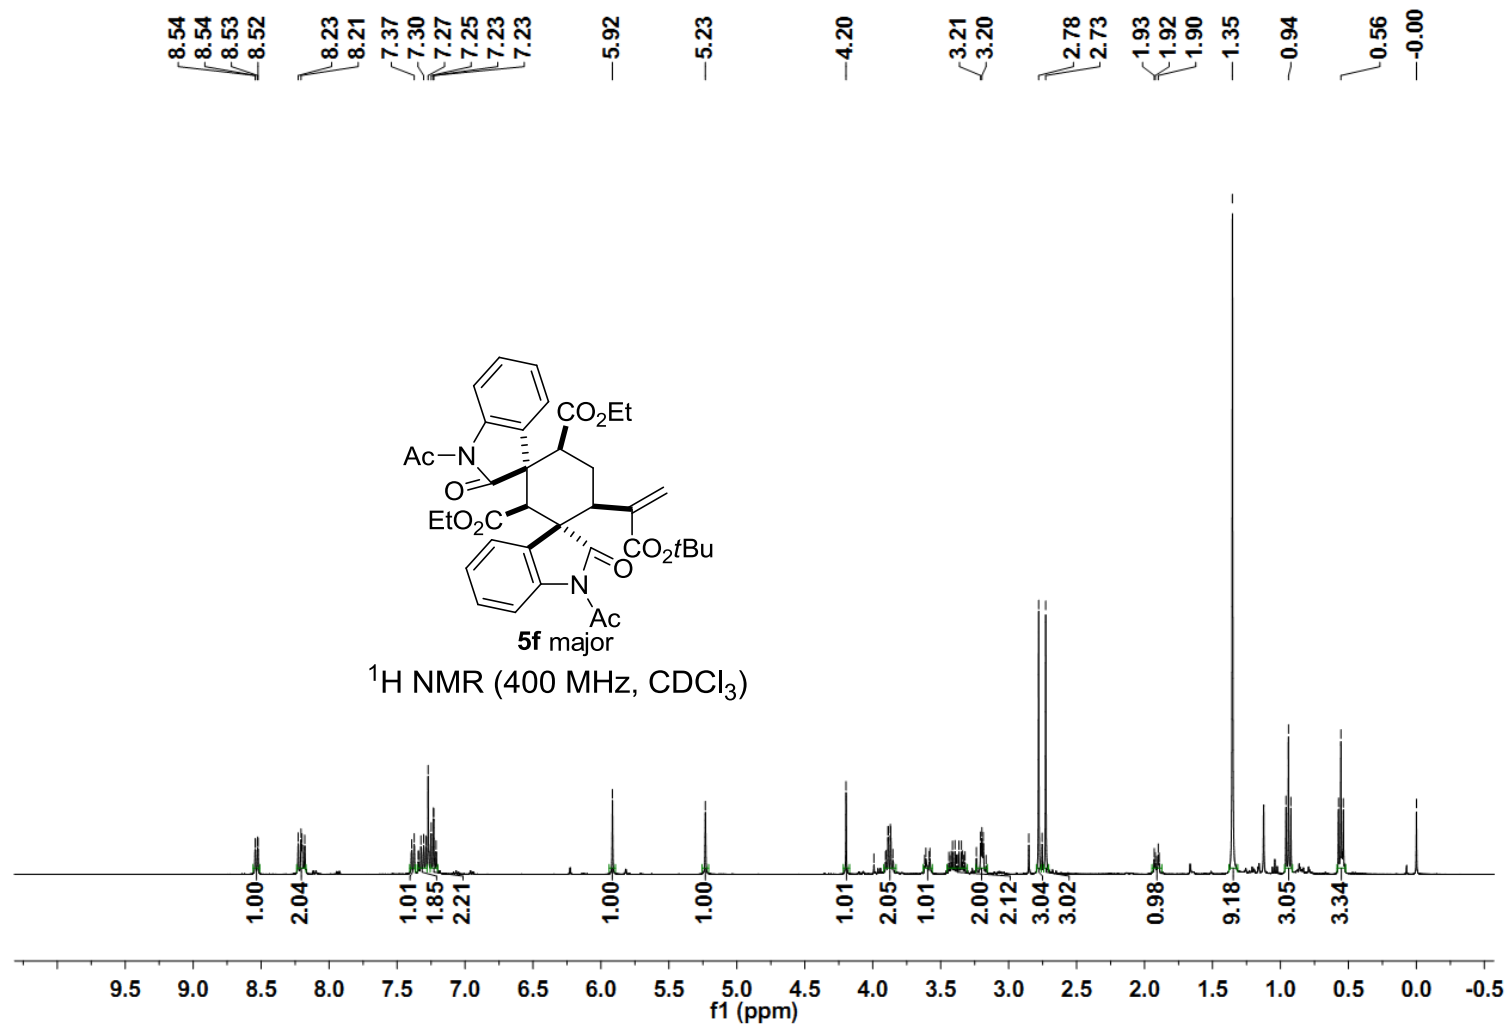

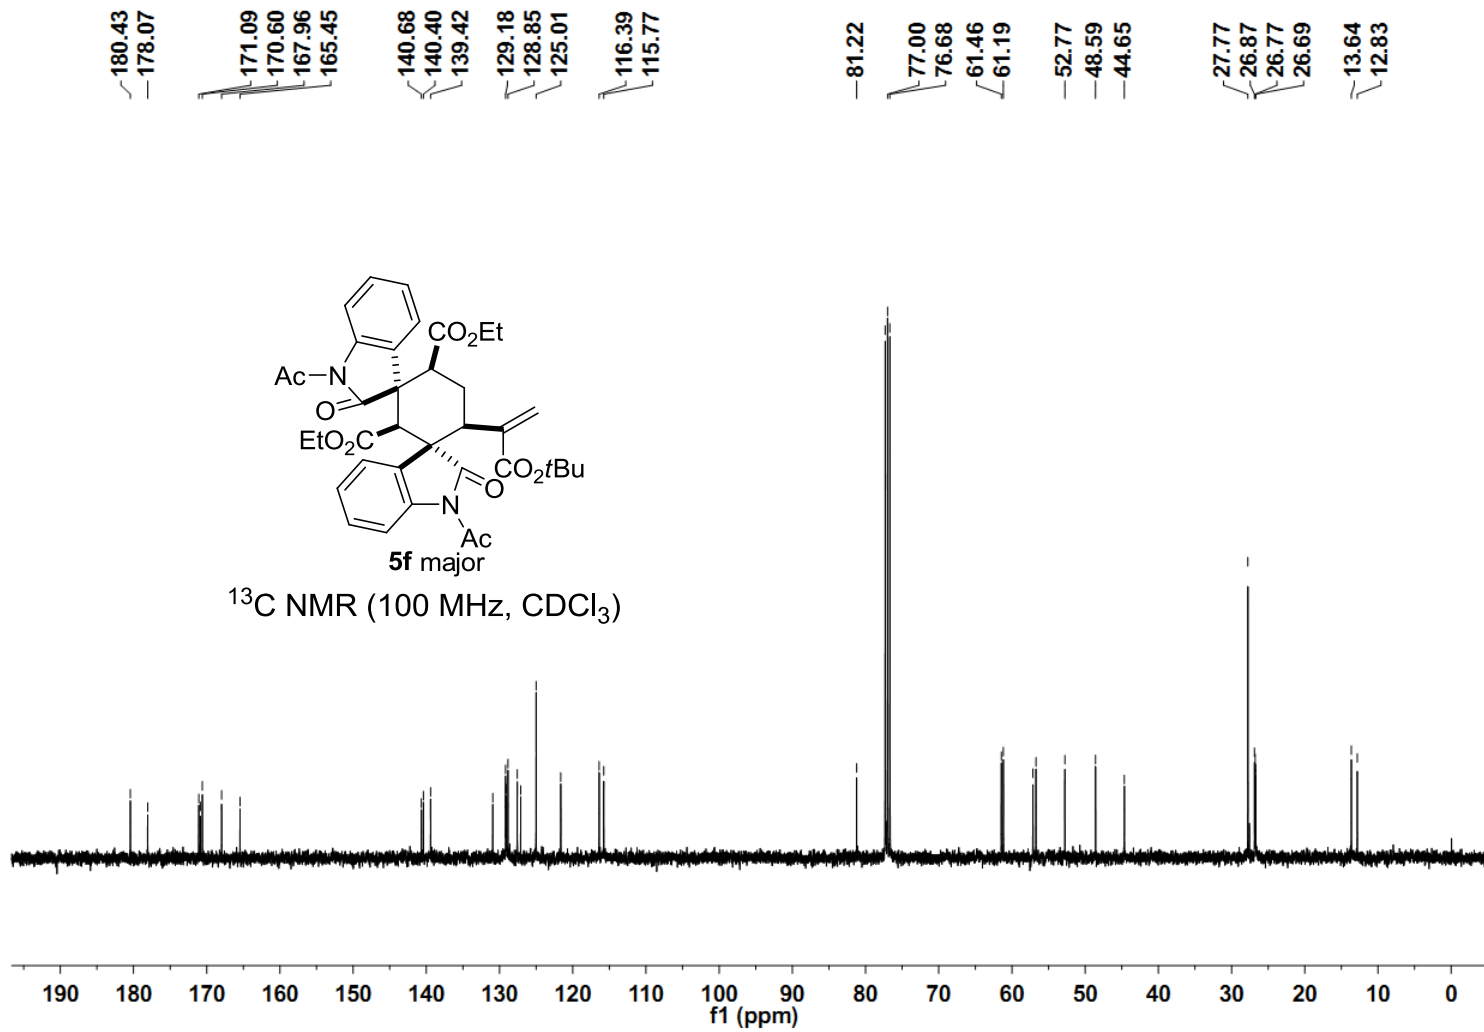

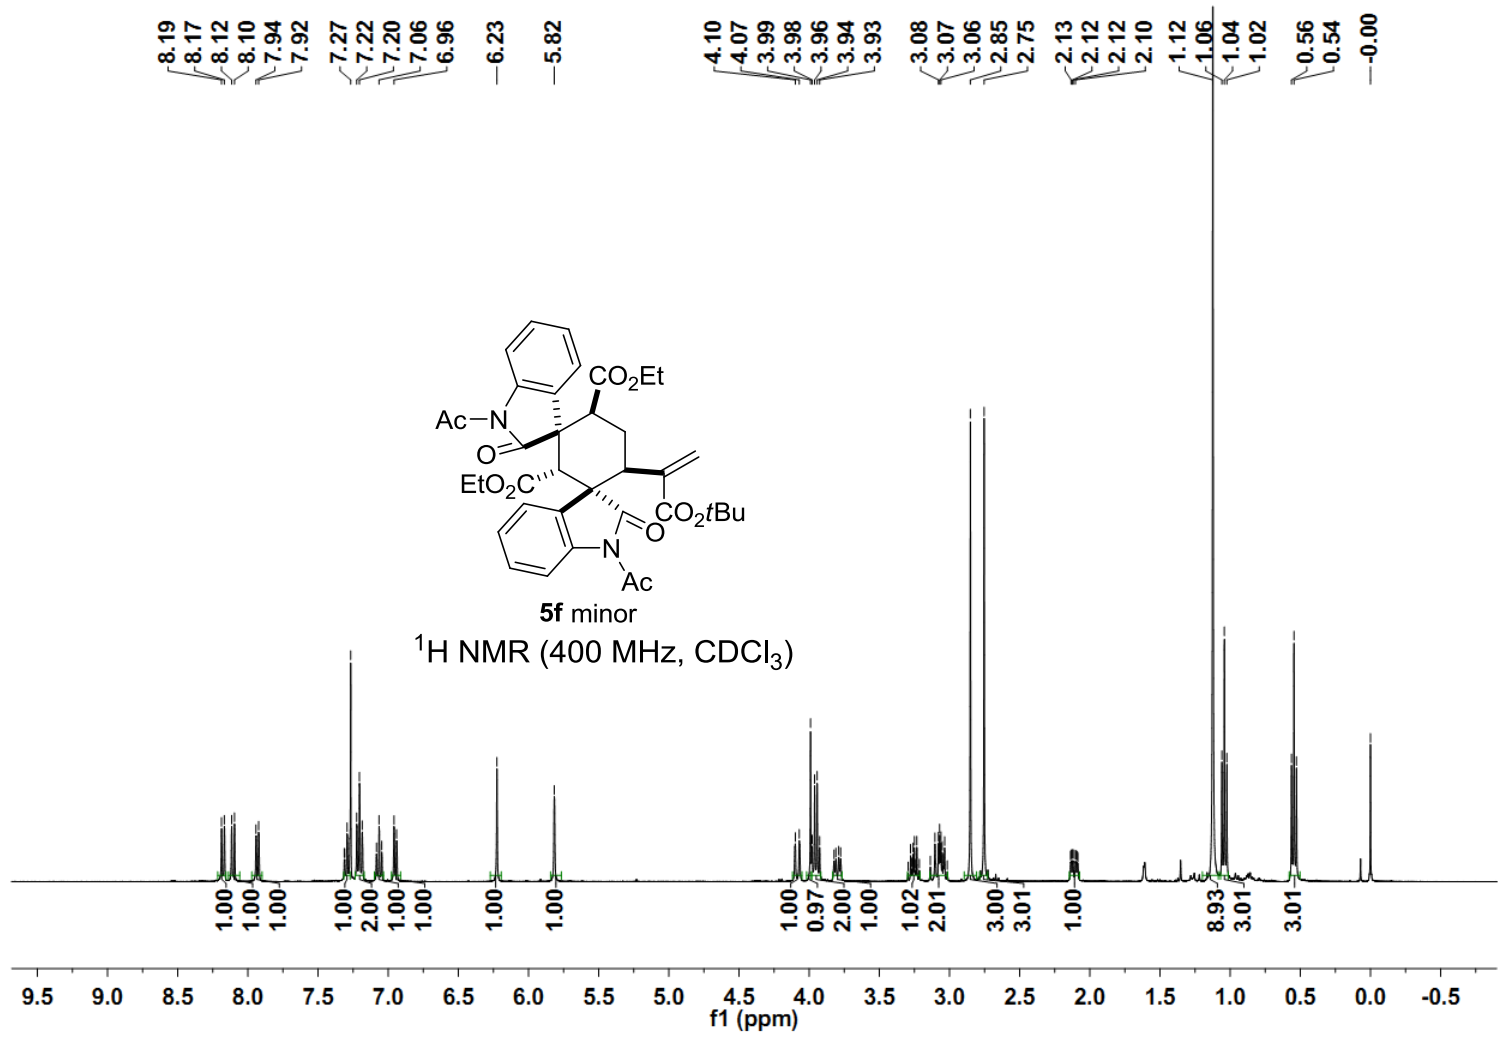



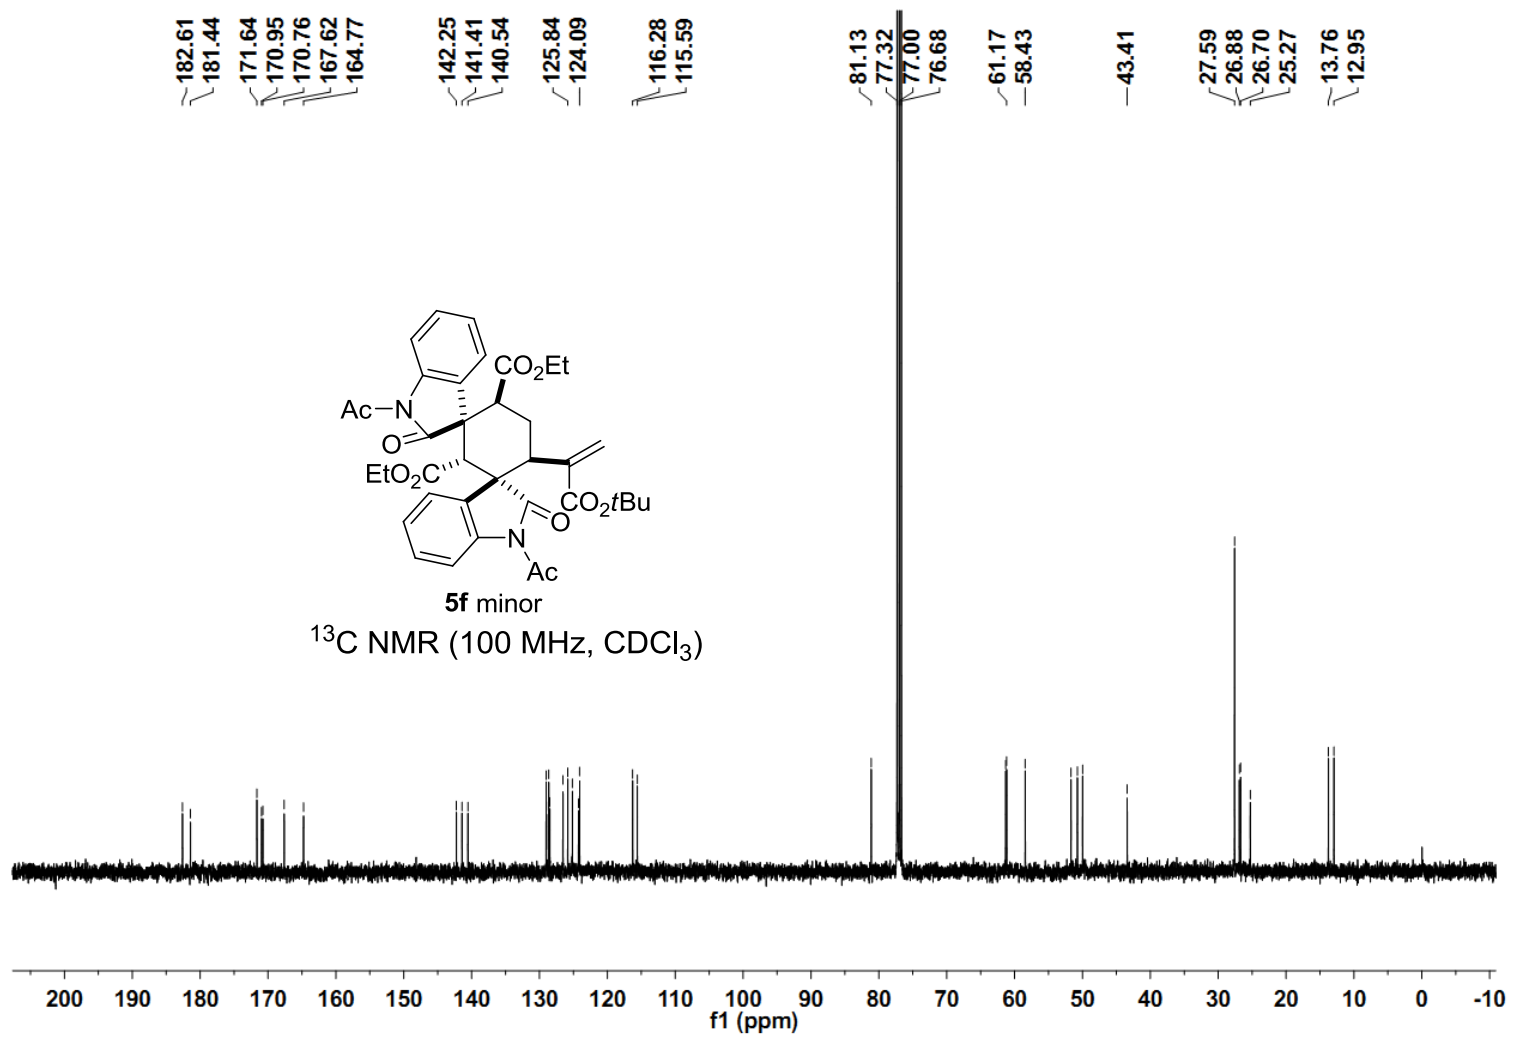

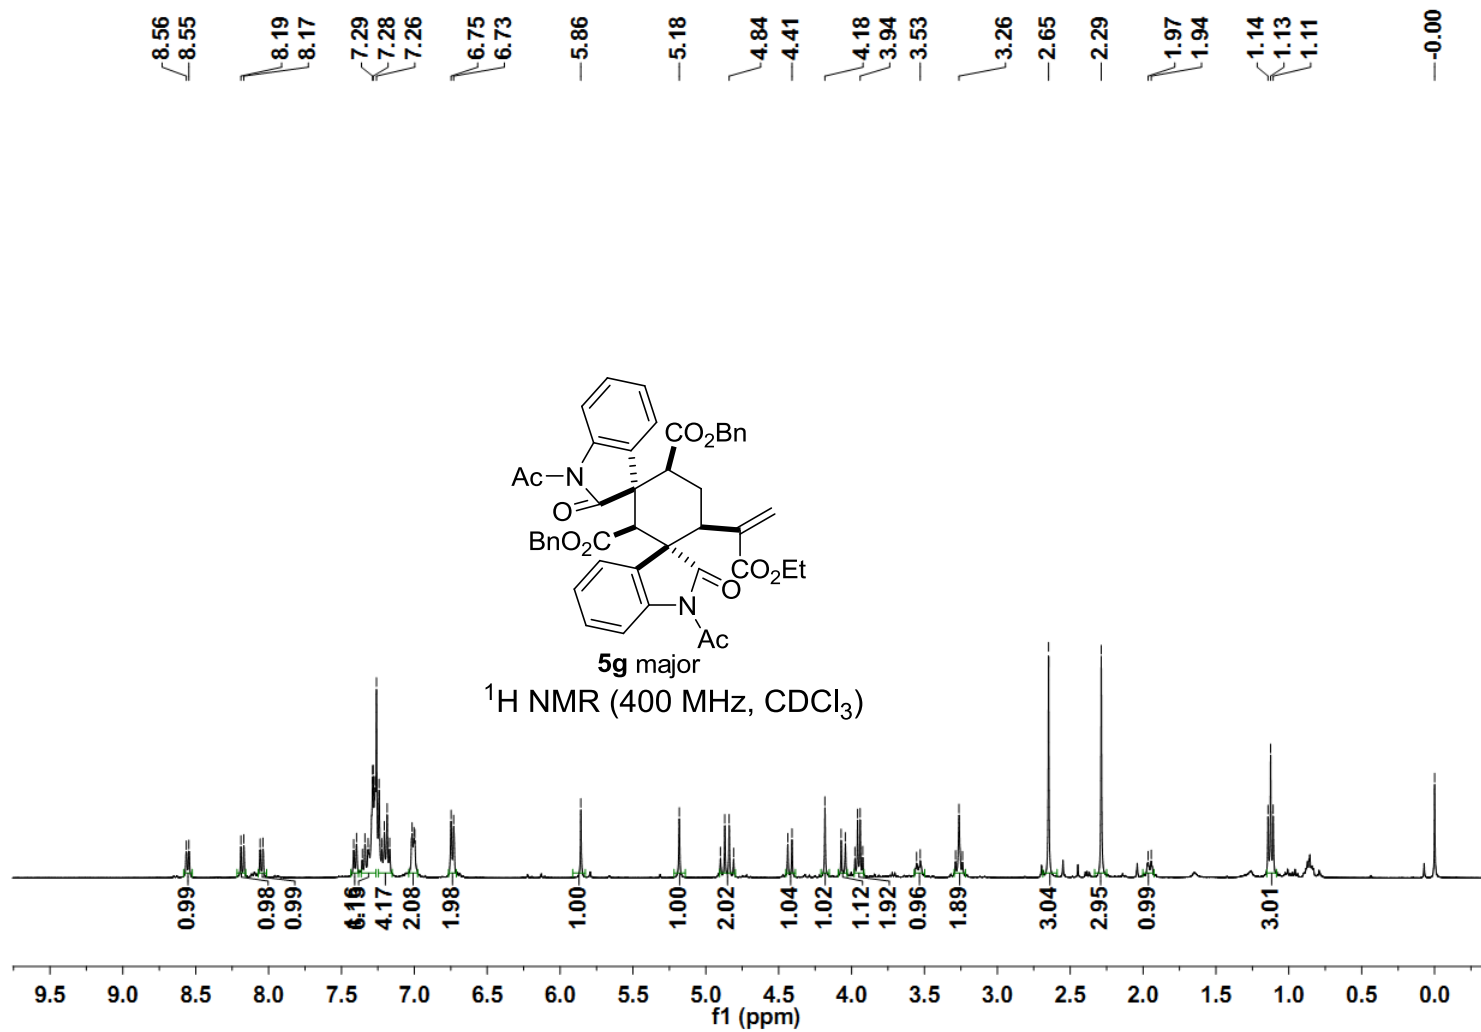

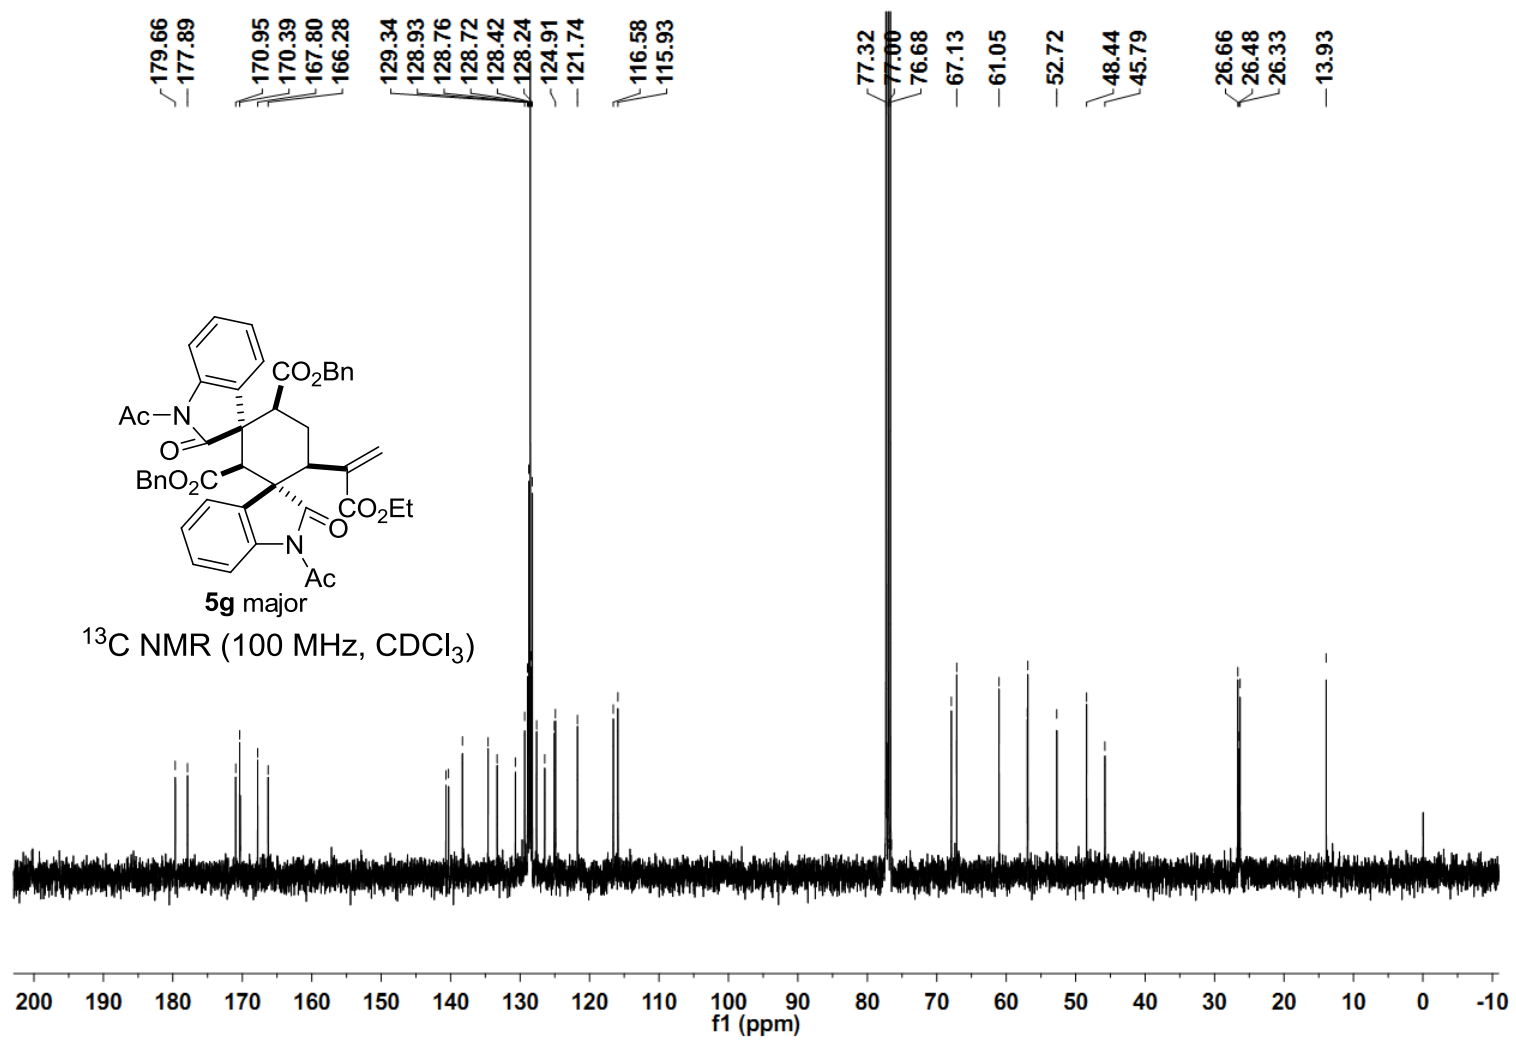

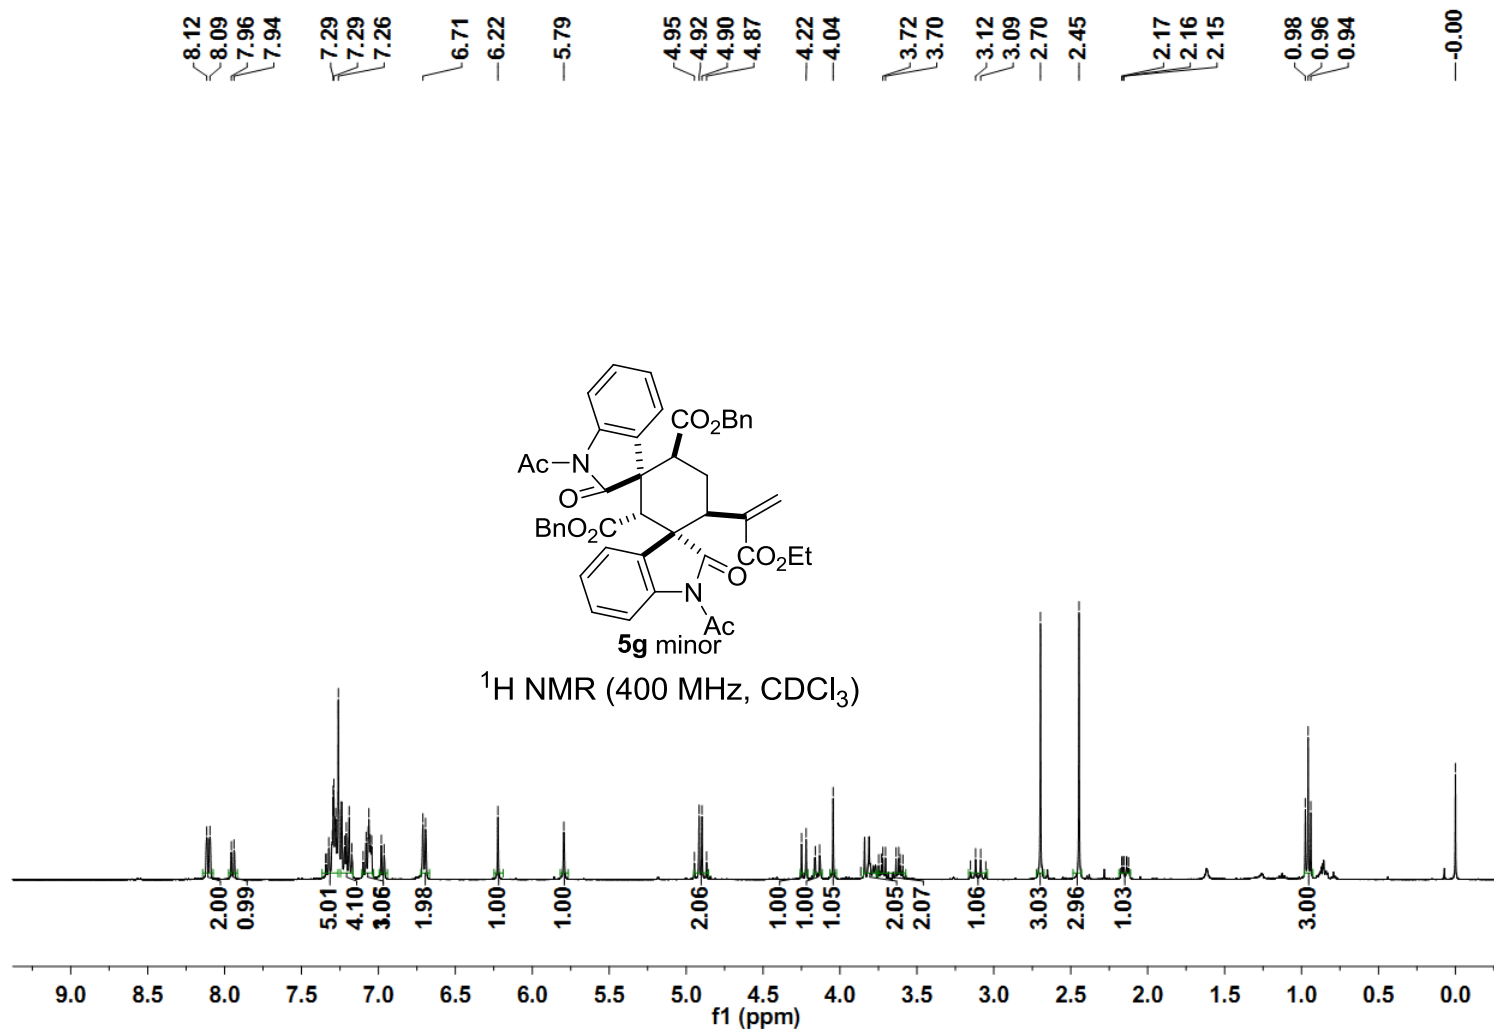

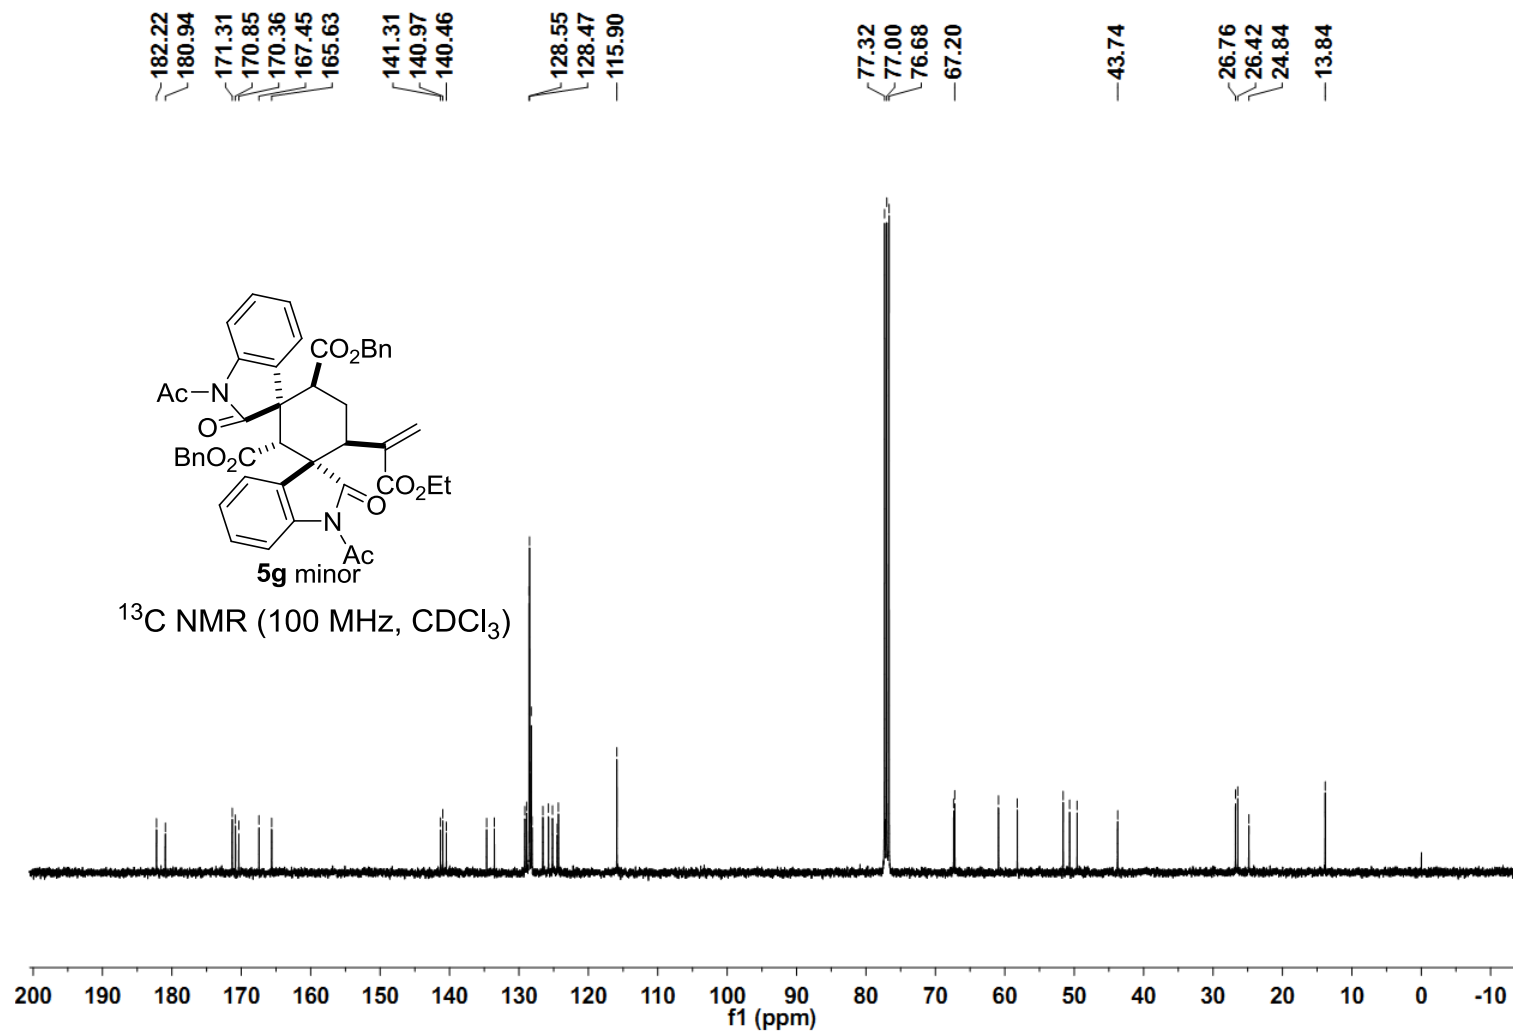

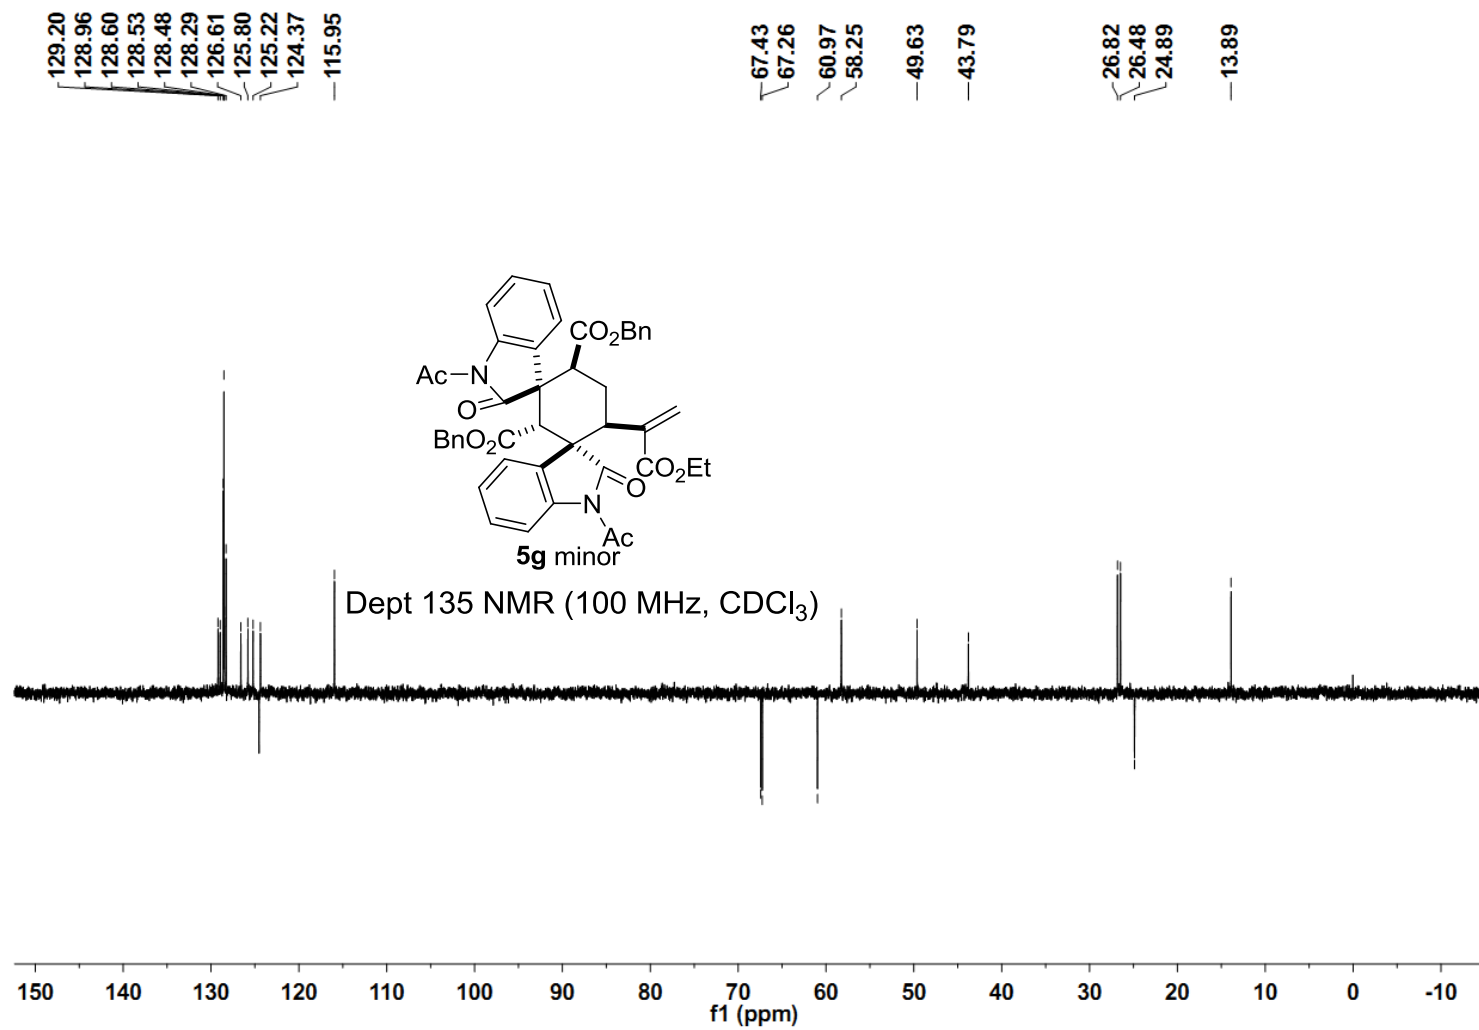

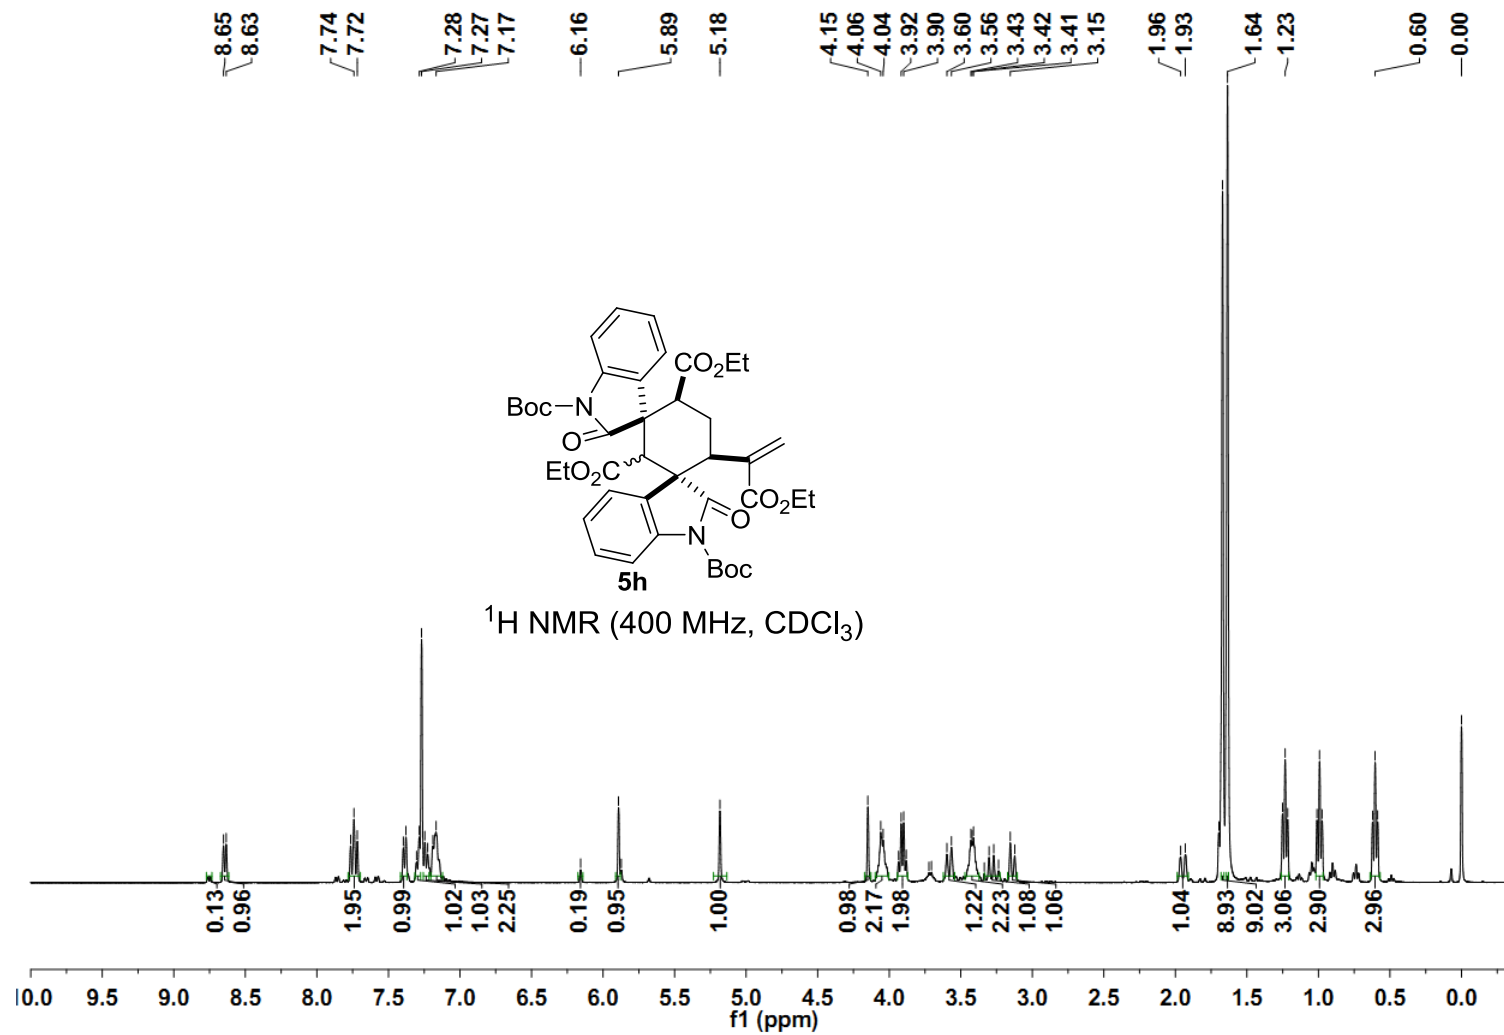

177.77  
175.66  
170.20  
167.80  
166.11  
149.09  
148.93  
140.03  
138.71  
128.80  
128.56  
124.12  
114.92  
114.04  
84.06  
83.73  
77.32  
76.68  
61.23  
61.04  
53.00  
48.52  
46.02  
28.15  
28.02  
26.41  
14.01  
13.60  
12.75

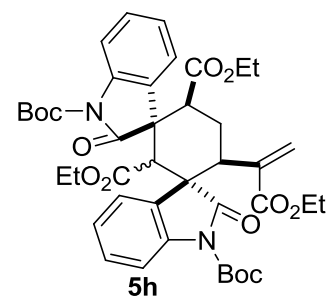

<sup>13</sup>C NMR (100 MHz, CDCl<sub>3</sub>)

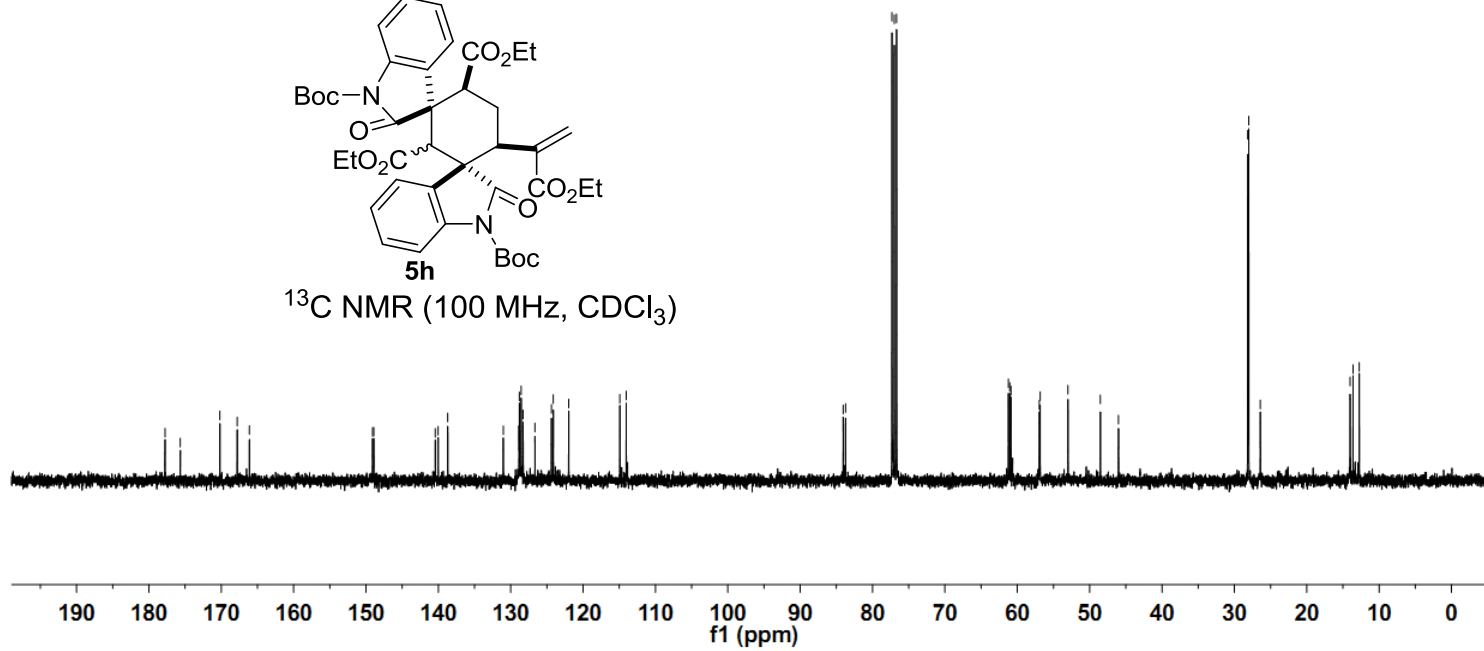



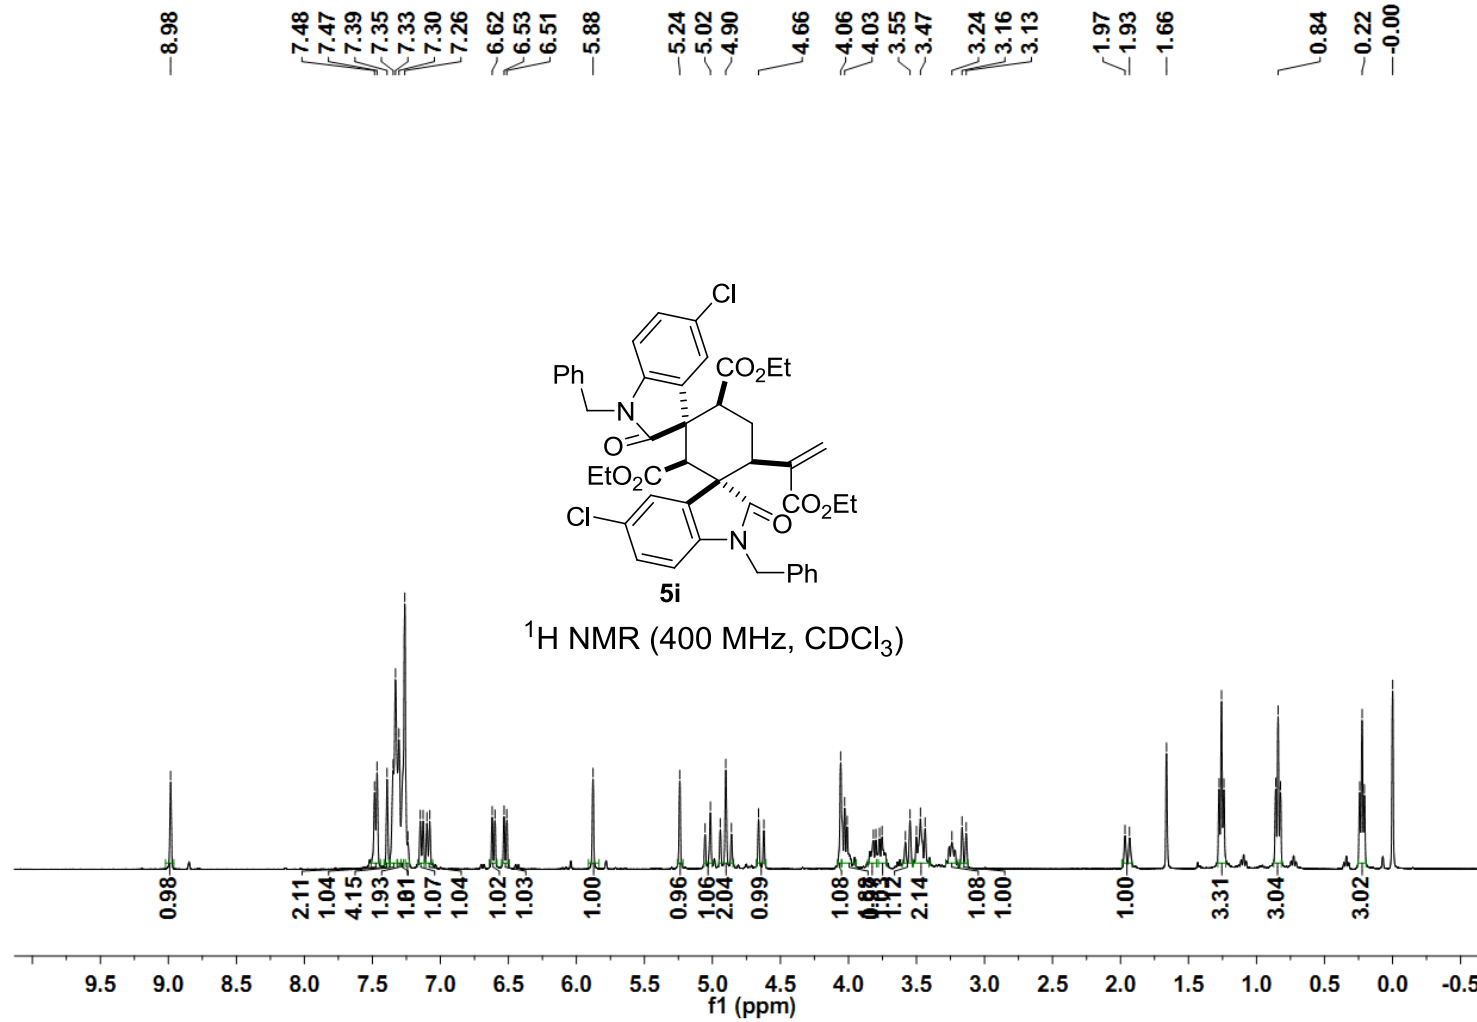

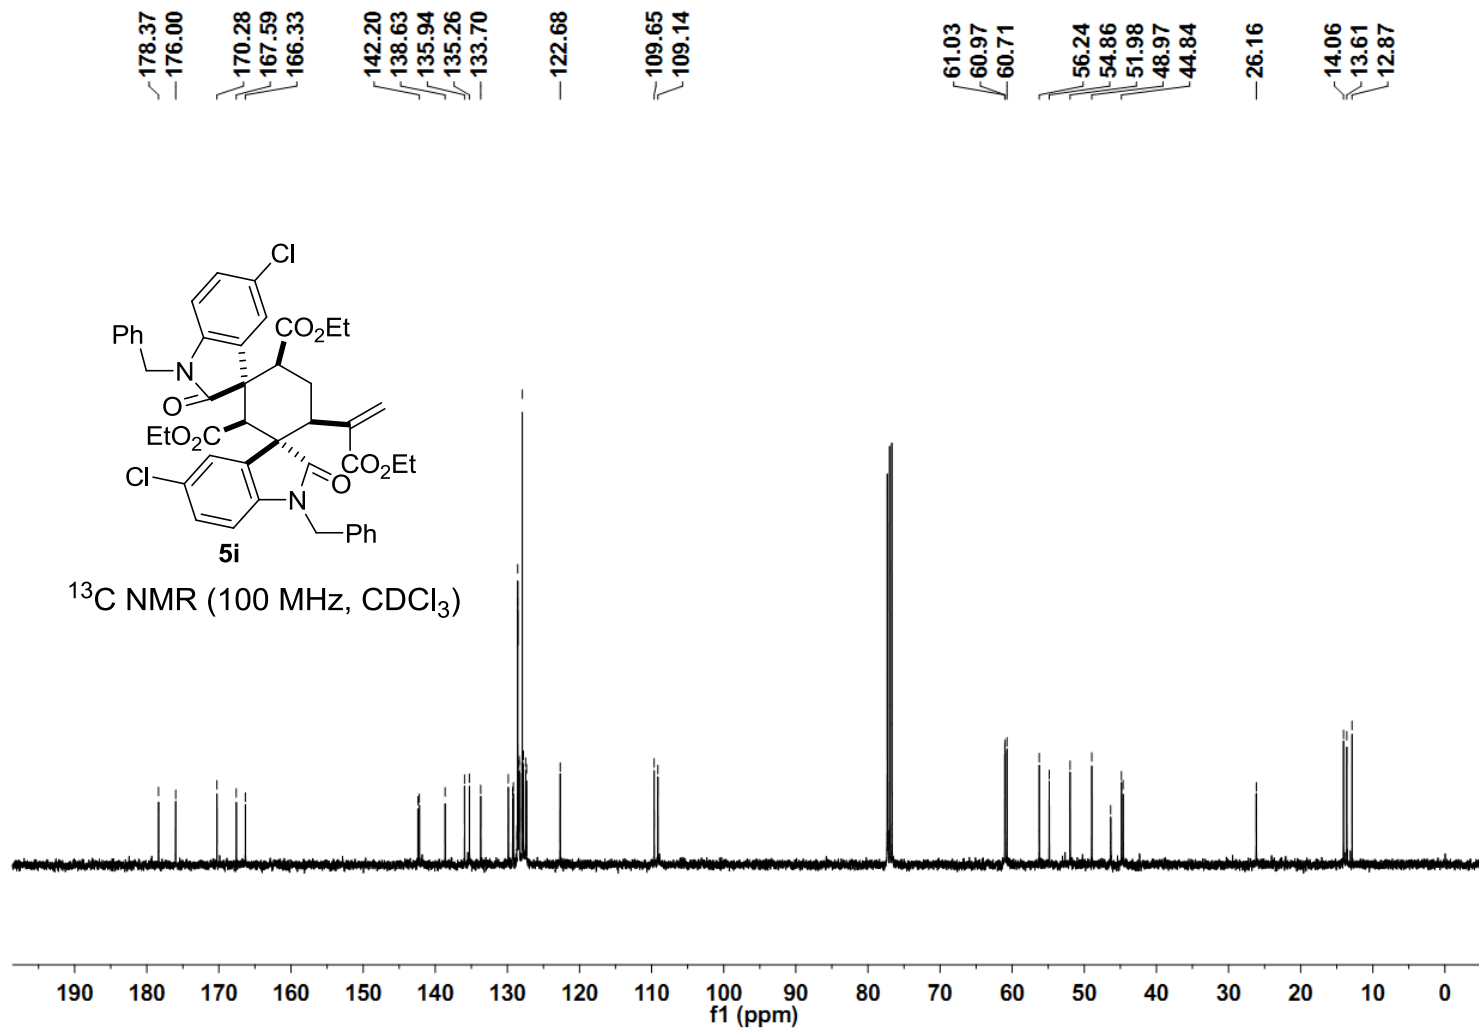

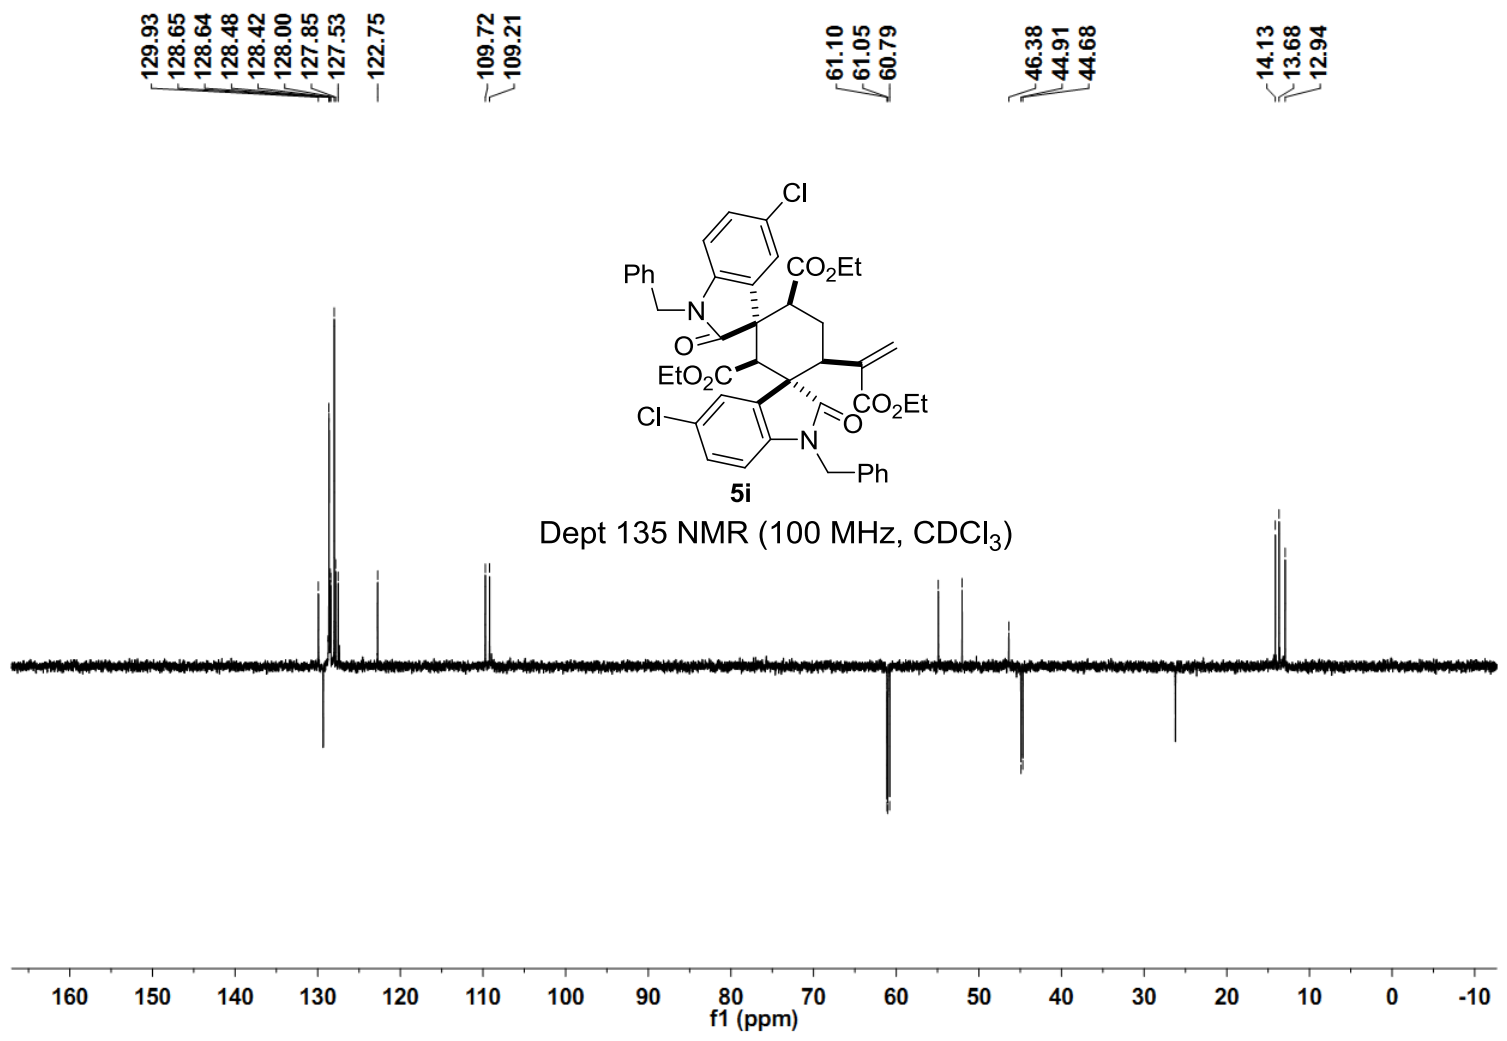

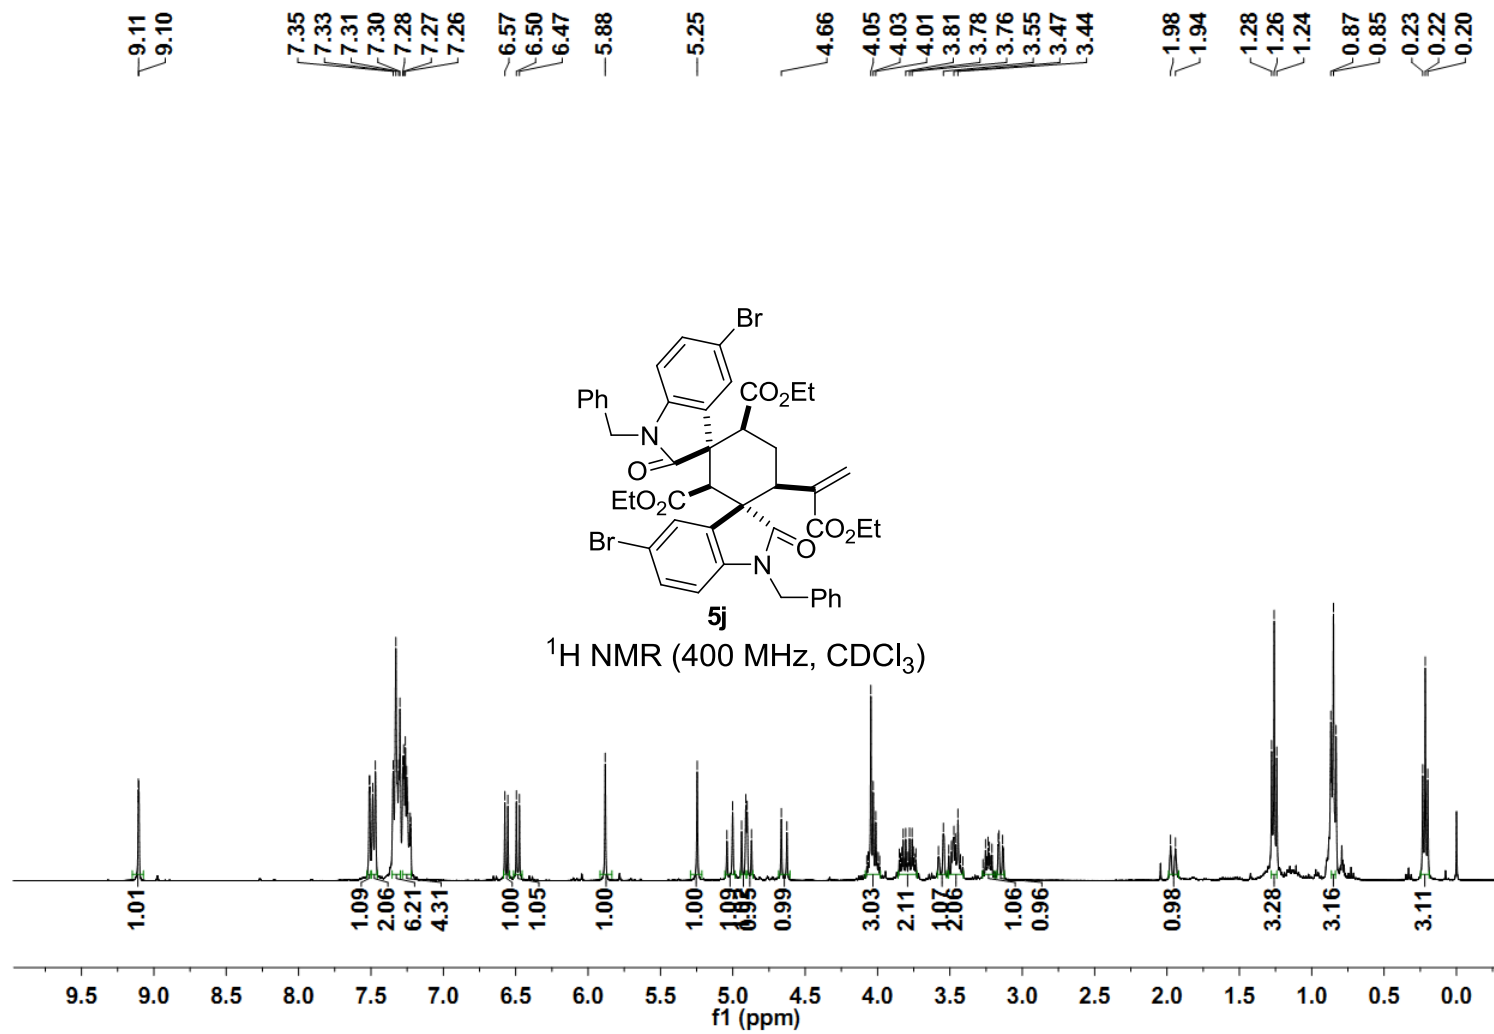

178.25  
 175.85  
 170.26  
 167.54  
 166.31  
 142.85  
 142.62  
 128.57  
 128.56  
 127.93  
 127.88  
 115.37  
 110.13  
 109.67  
 77.32  
 77.00  
 76.68  
 61.05  
 60.72  
 56.18  
 51.92  
 48.83  
 44.79  
 44.55  
 26.12  
 14.07  
 13.60  
 12.85

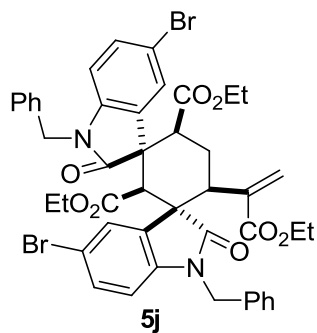

$^{13}\text{C}$  NMR (100 MHz,  $\text{CDCl}_3$ )

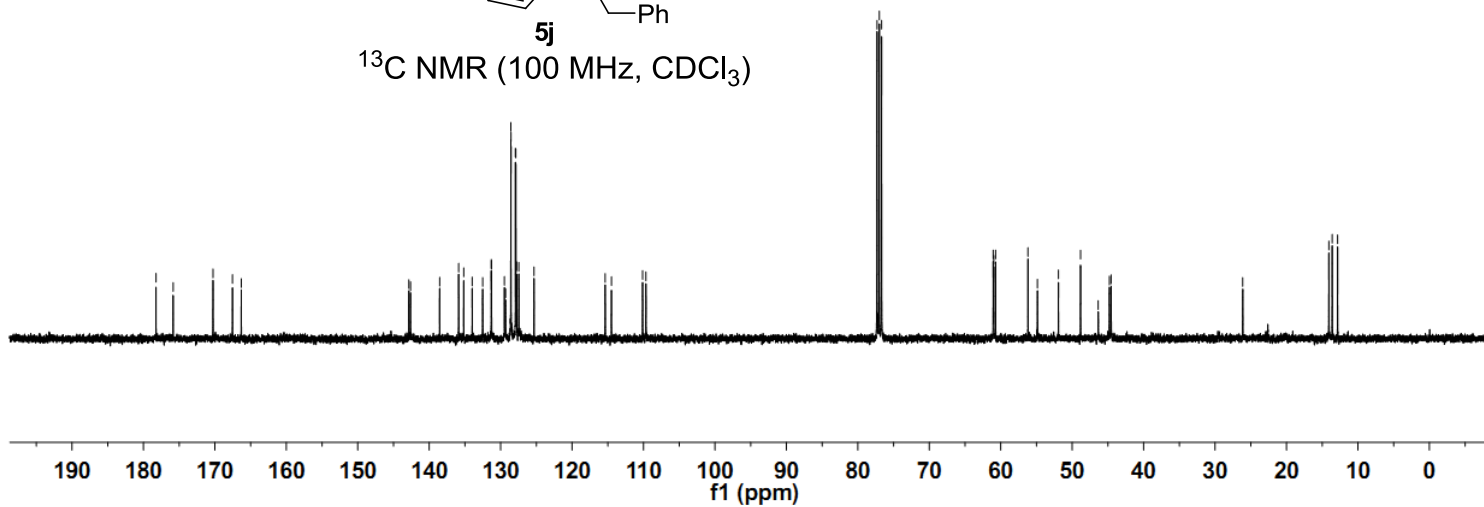

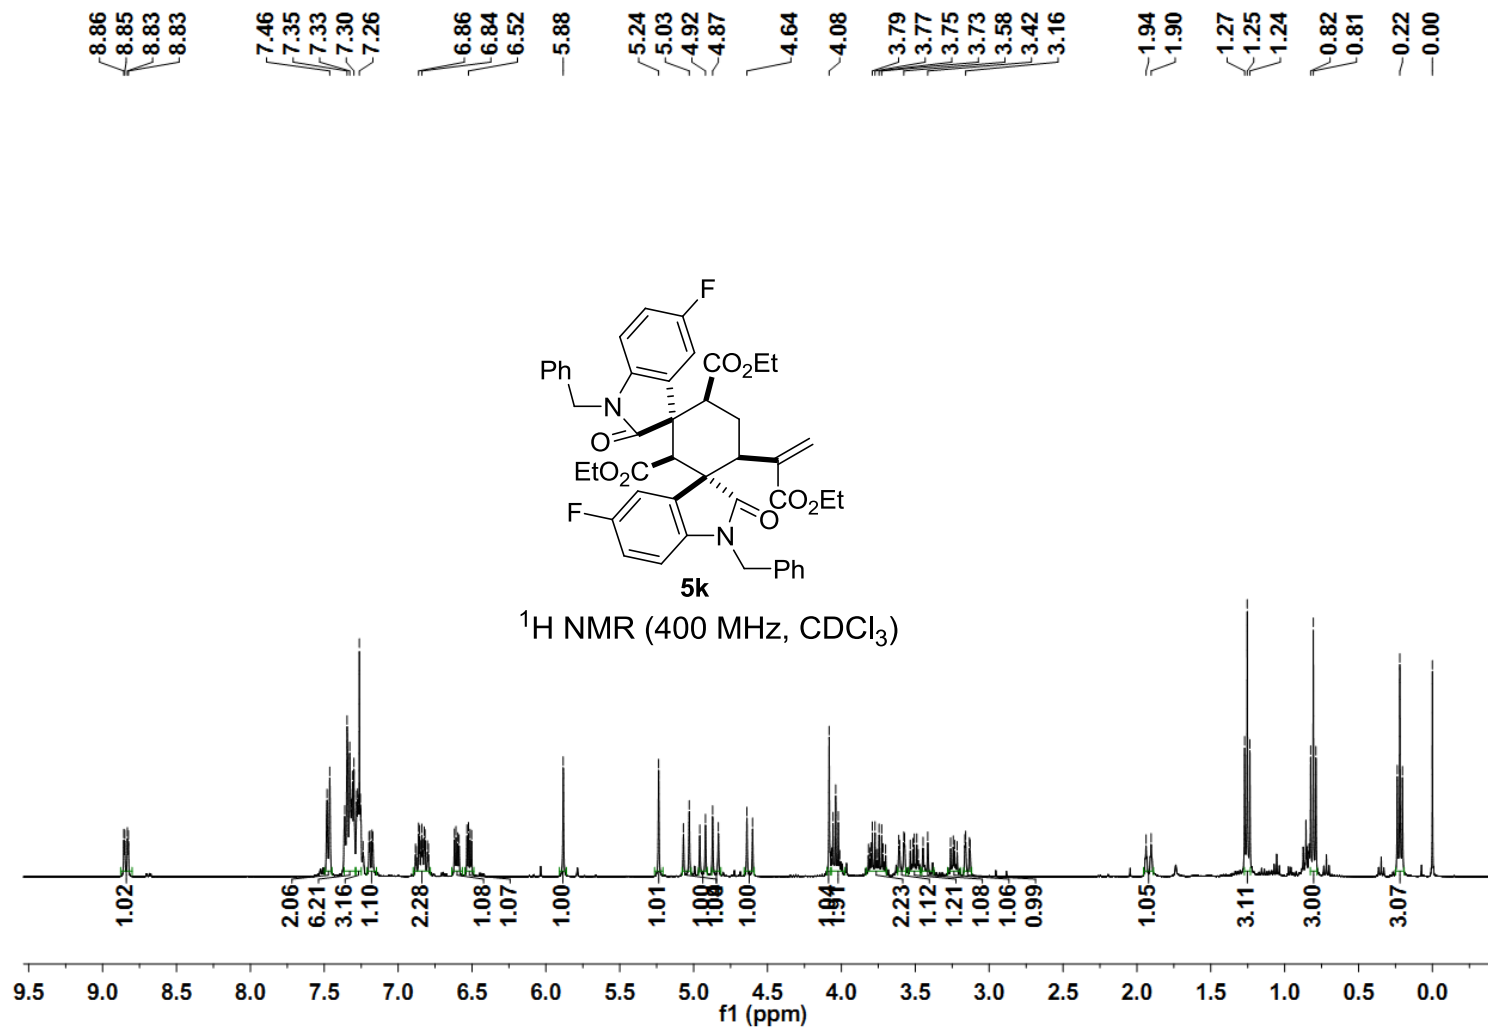

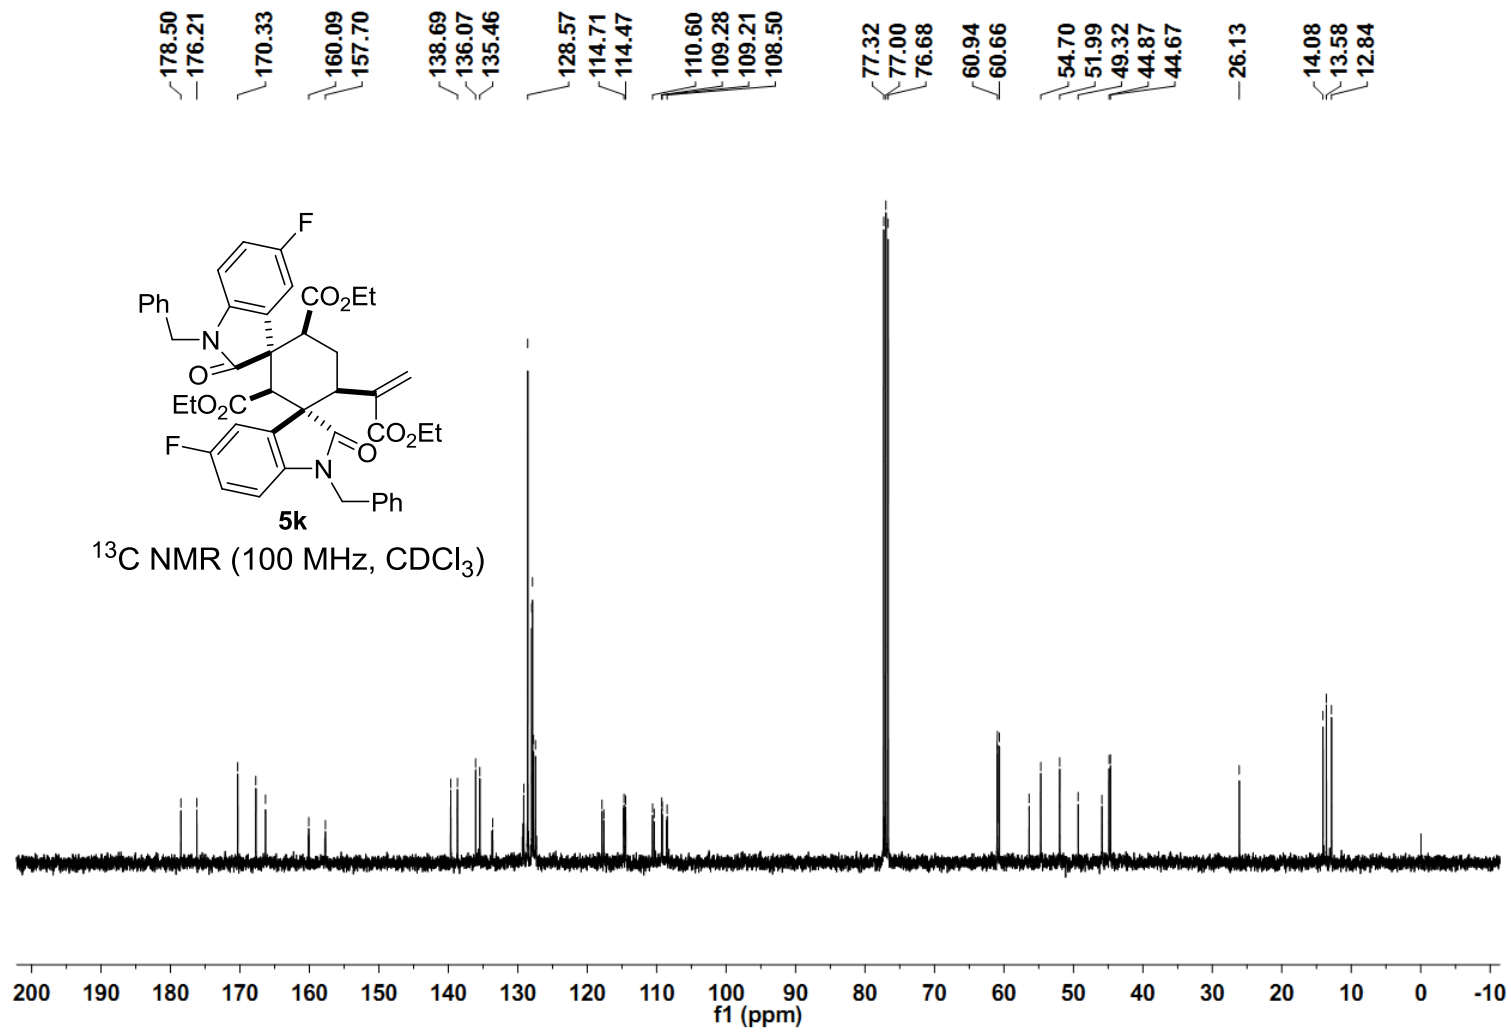

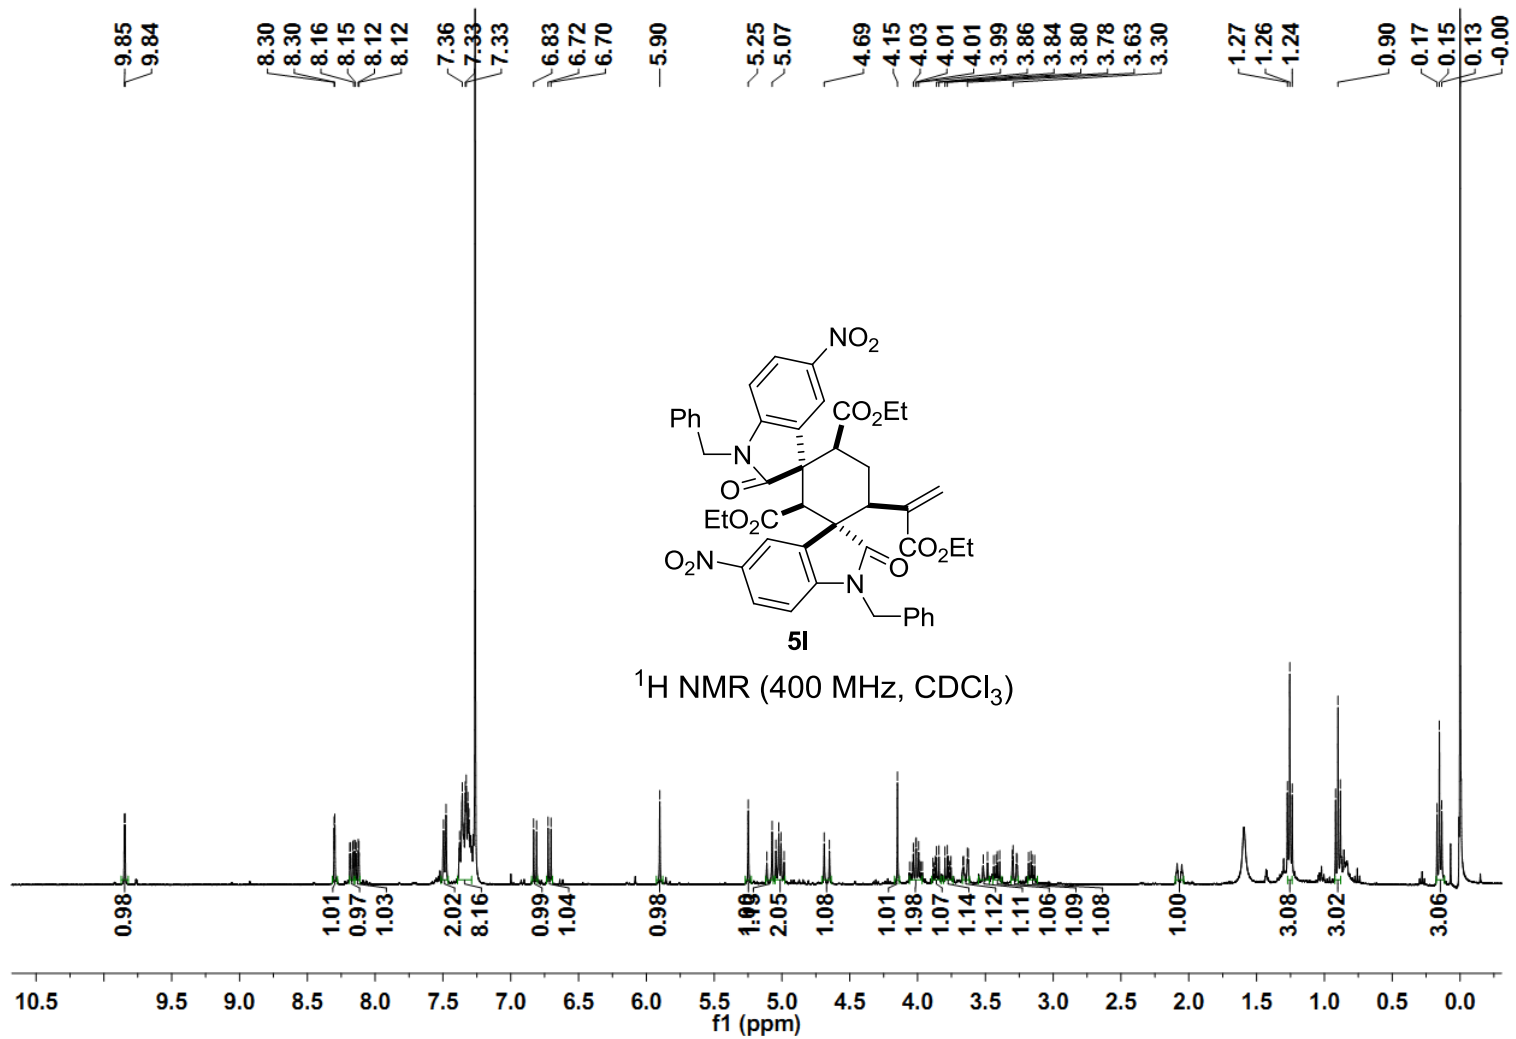



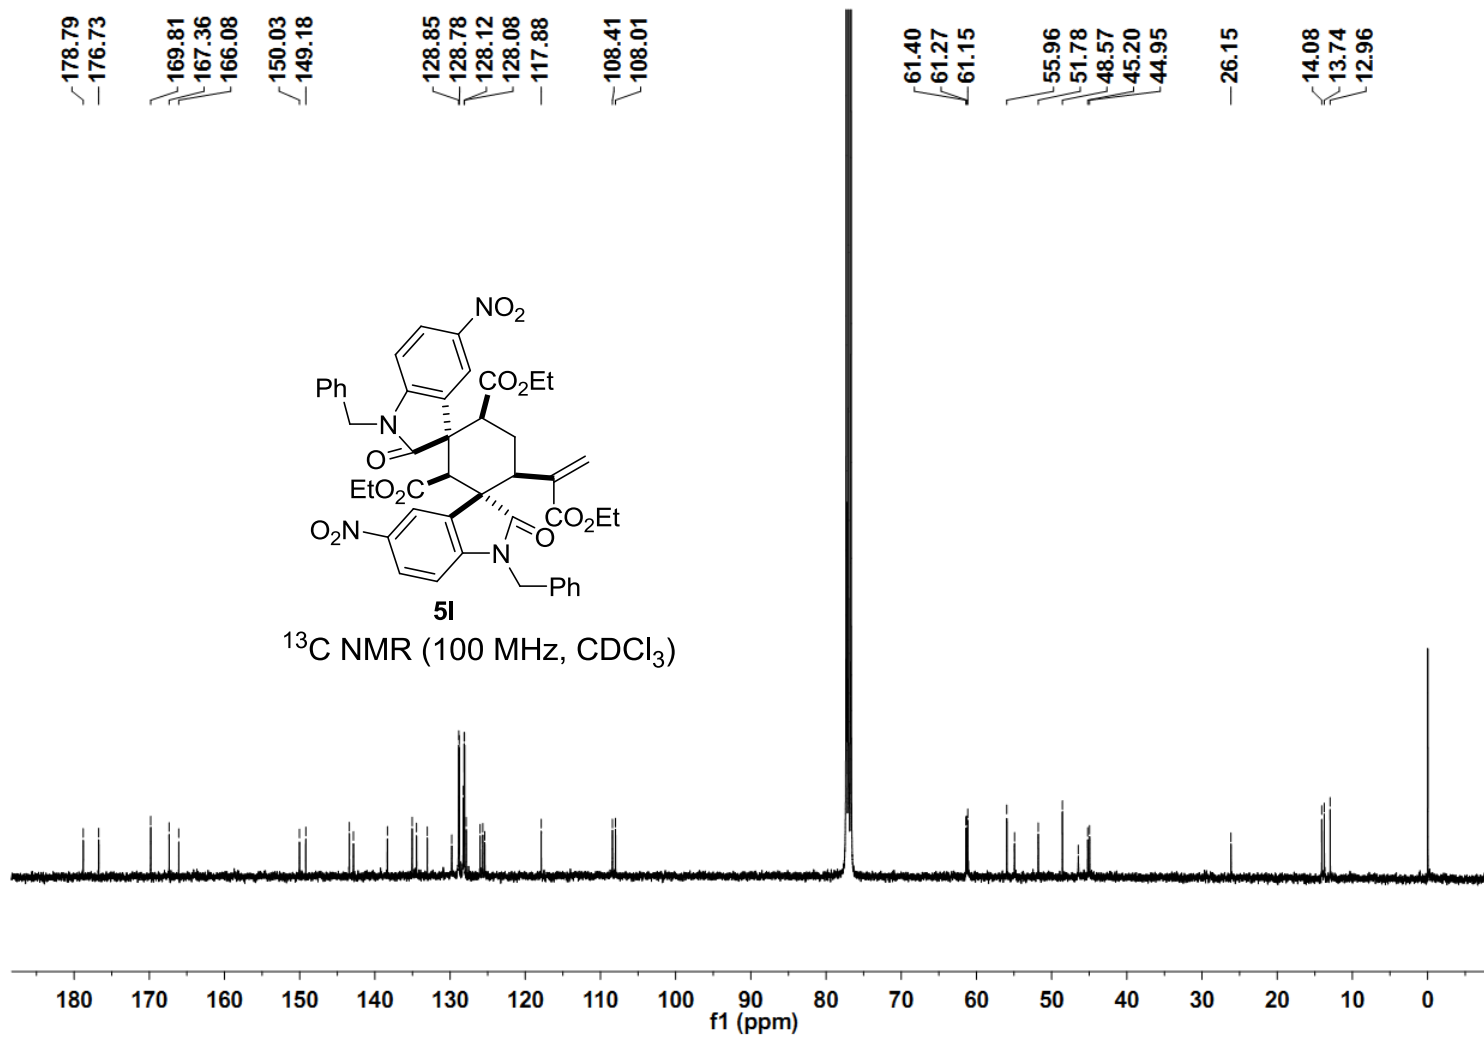

8.76  
8.74  
7.34  
7.34  
7.32  
7.31  
7.26  
6.84  
6.75  
5.86  
5.19  
4.95  
4.87  
4.84  
4.05  
4.00  
3.99  
3.98  
3.97  
3.80  
3.78  
3.76  
3.74  
1.94  
1.91  
1.24  
1.22  
0.84  
0.28  
0.00

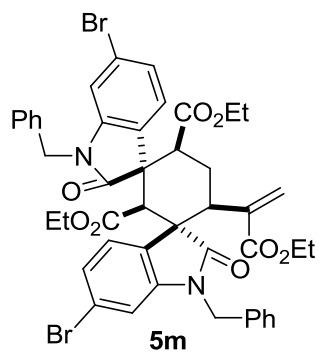

<sup>1</sup>H NMR (400 MHz, CDCl<sub>3</sub>)

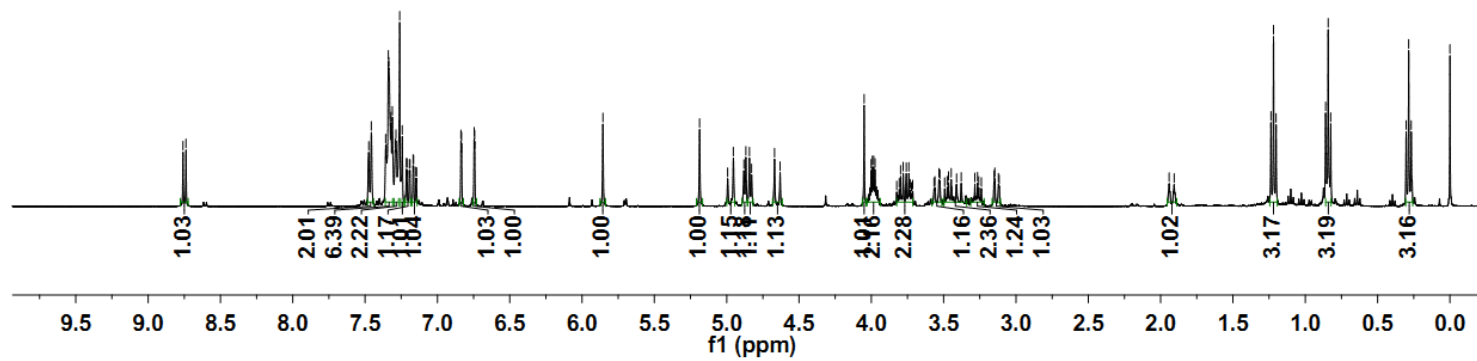

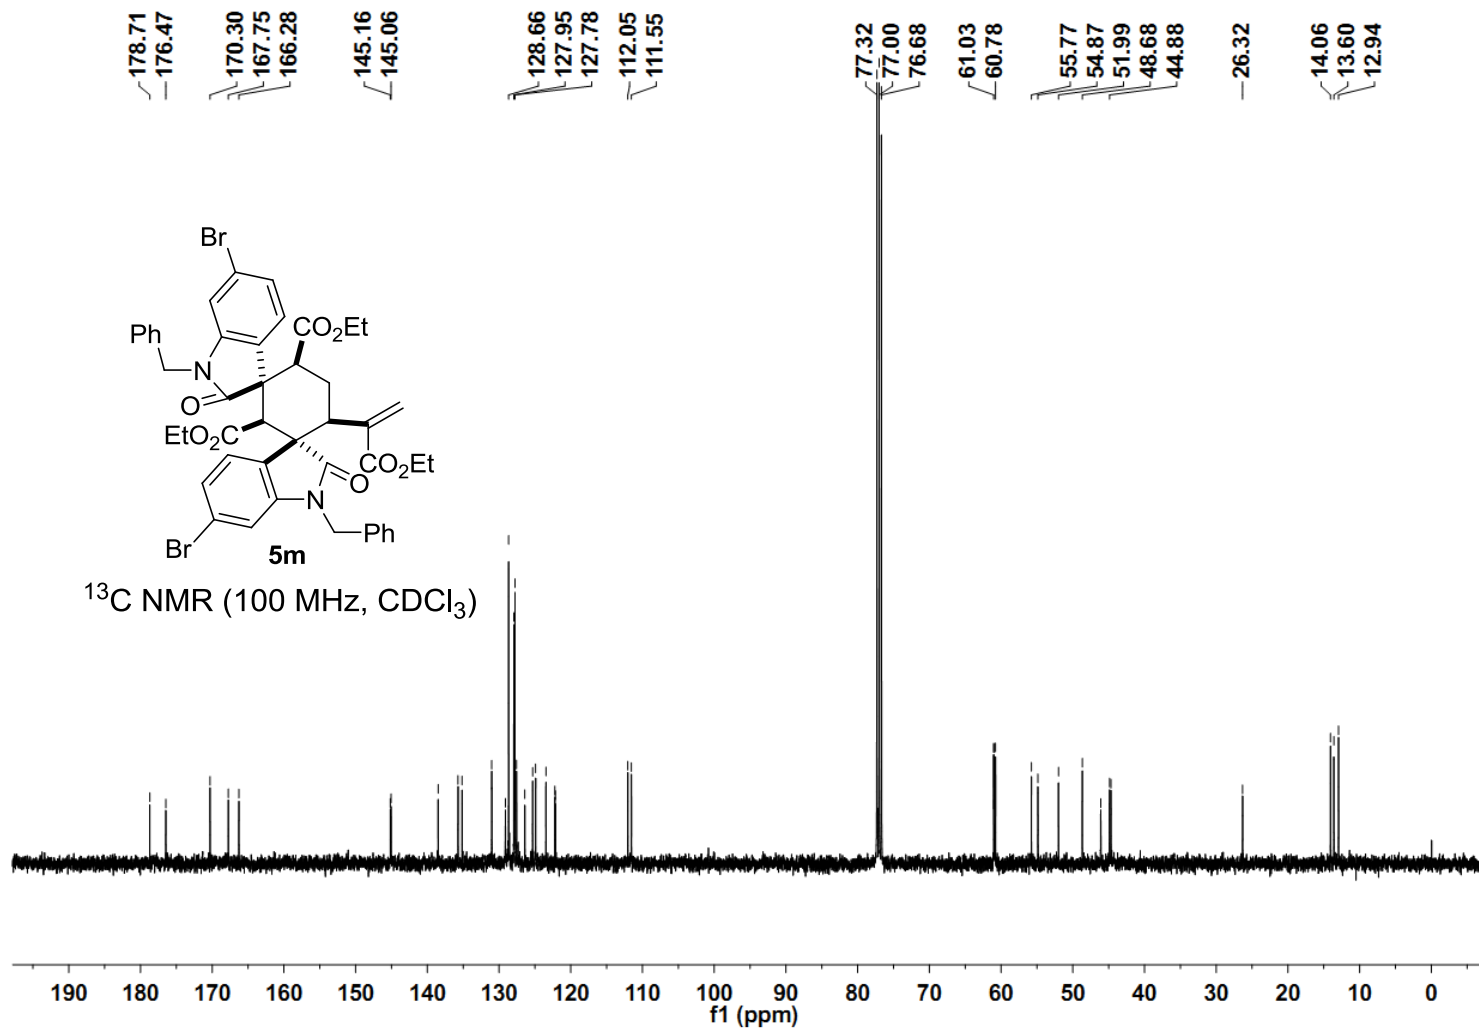

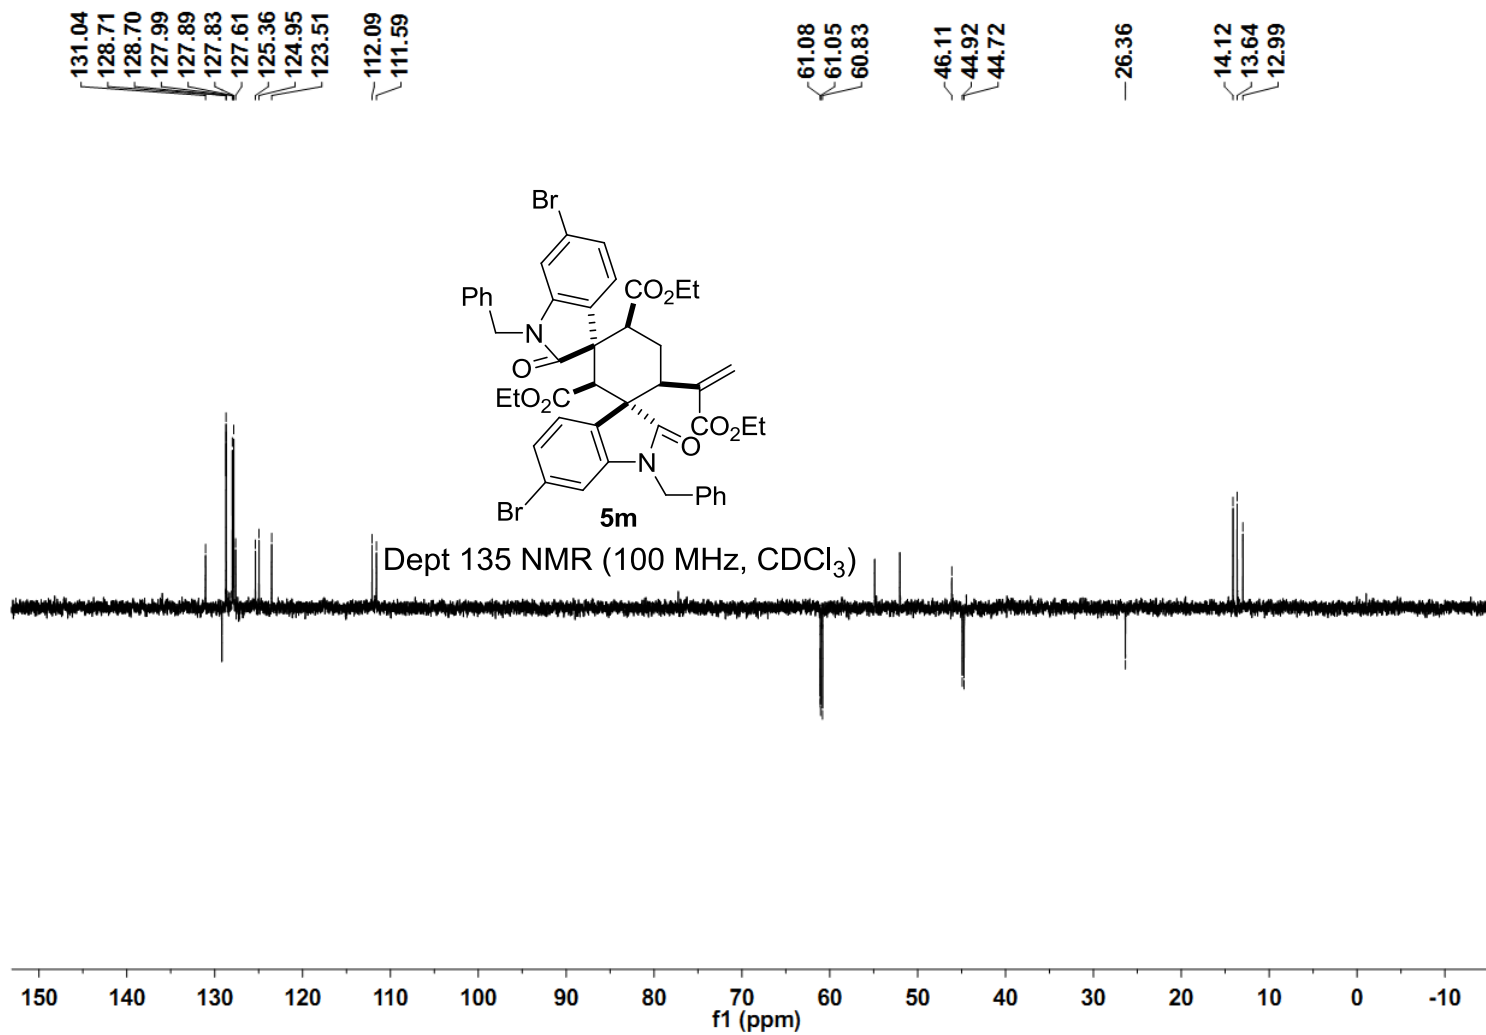

### III. NOESY Spectra for Compound 5a

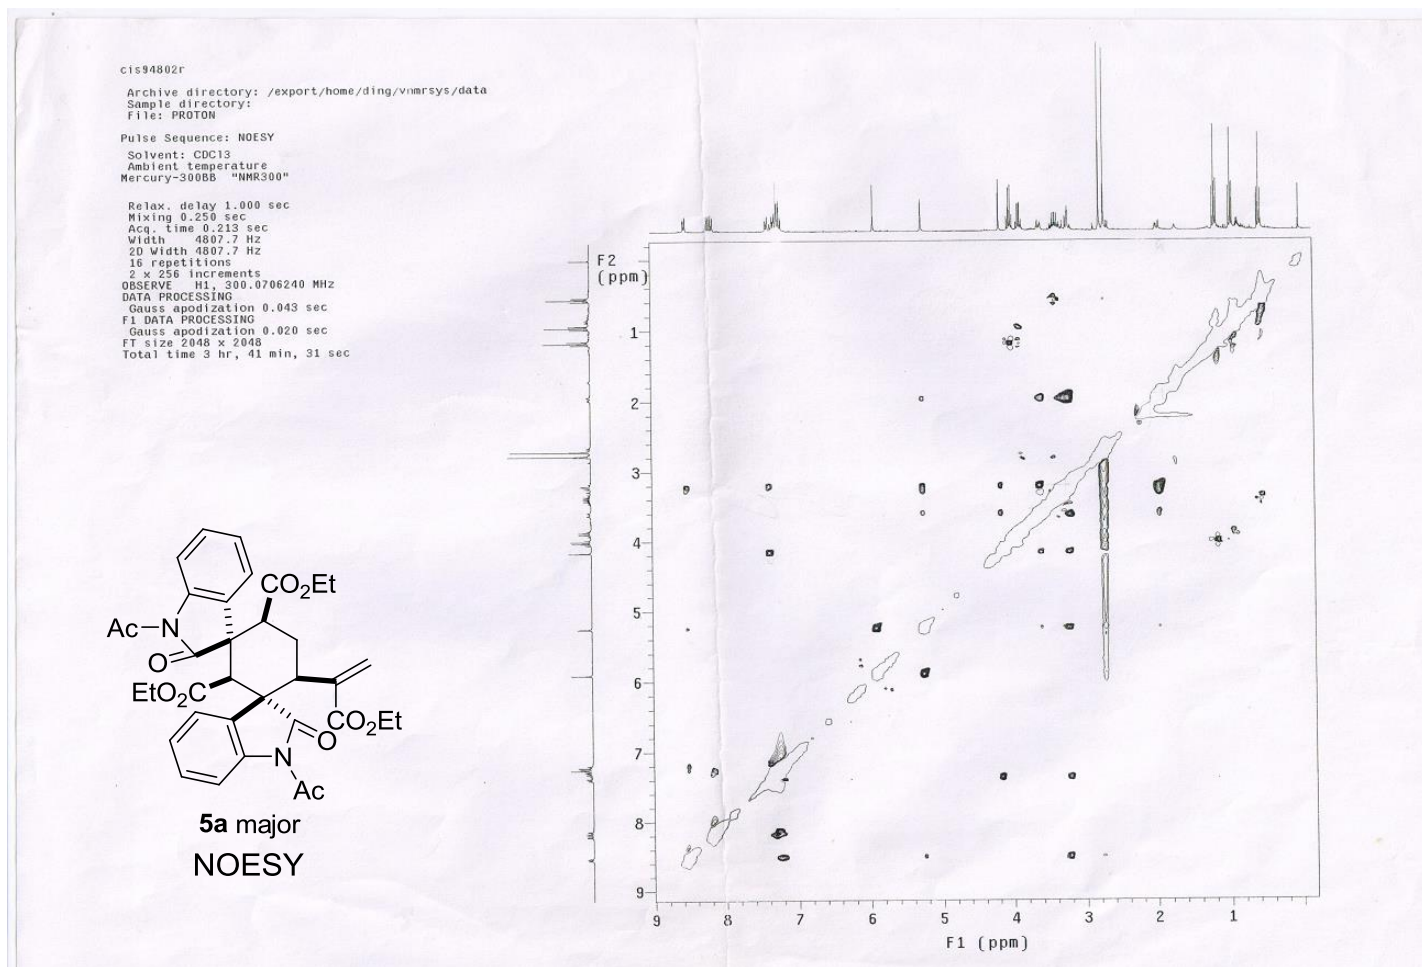

cis948016

Archive directory: /export/home/ding/vnmrSYS/data  
Sample directory:  
File: PROTON

Pulse Sequence: NOESY  
Solvent: CDCl3  
Ambient temperature  
Mercury-300BB "NMR300"

Relax. delay 1.000 sec  
Mixing 0.250 sec  
Acq. time 0.213 sec  
Width 4807.7 Hz  
2D Width 4807.7 Hz  
16 repetitions  
2 x 200 increments  
OBSERVE H1, 300.0706261 MHz  
DATA PROCESSING  
Gauss apodization 0.047 sec  
F1 DATA PROCESSING  
Gauss apodization 0.020 sec  
FT size 2048 x 2048  
Total time 2 hr, 52 min, 39 sec

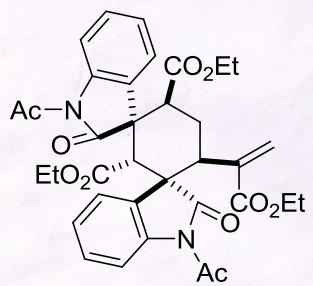

5a minor  
NOESY

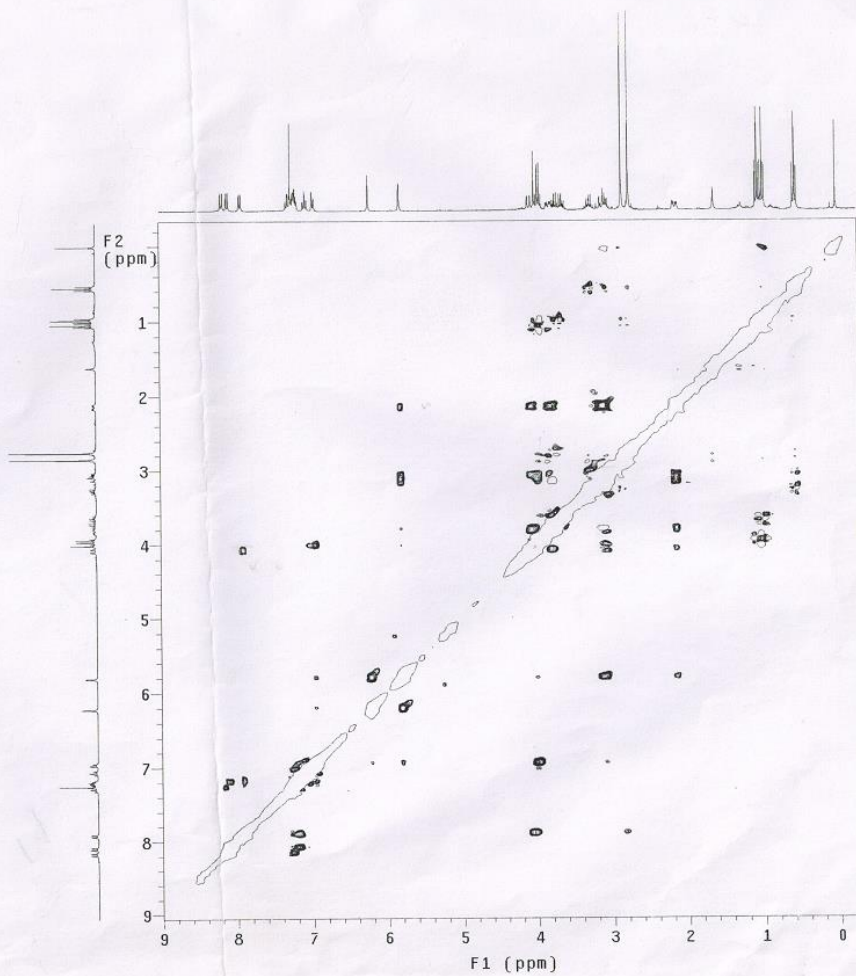

Supplement: c4ob01927j1.pdf [file c4ob01927j1.pdf]
